# Supplementary material for: A High-Quality Reference Genome Sequence and Genetic Transformation System of Aralia elata
Source: Frontiers journal article supplement (doi:10.3389/fpls.2022.822942), 2022-03-01
Supplement: Table_2.XLSX [file Table_2.XLSX]

## Sheet: Gene_id_rename
Gene symbol	ID	Nucleic acid sequence	Protein sequence
AeCYP71D1	Arel.032717	ATGGAGTTCCAATATTCCCTCTTCTCTATCATCATTACTTCCCTAGCCAGCATCCTCTTTTTCTTTGTTTTGATCAATAAGTTATTGAAAAGATCCTCAAAAGTAGCTCATAAACTTCCCCCAGGGCCATGGAAGCTACCTCTGATCGGAAATTTGATTCAAGTGGCTGCTTCAAATCCGATACCACATCGCGGTCTGCTTGAATTGTCAAGGAAACATGGACCTCTCATGCATCTACAACTTGGTAAAATTCCTGCTATTGTTGTCTCATCGCCTCGAGTCGCCAAAGAGGTATTGAGAACCCATGATCTTGCCTGCGCGGACAGGCCGGATATGCTCCTGGGCAAGATAATGTTGGCCAACAGTAGAGACATTGTTTTGGCTCCCTATGGCGATTAC…	MEFQYSLFSIIITSLASILFFFVLINKLLKRSSKVAHKLPPGPWKLPLIGNLIQVAASNPIPHRGLLELSRKHGPLMHLQLGKIPAIVVSSPRVAKEVLRTHDLACADRPDMLLGKIMLANSRDIVLAPYGDYWRQMRKISTSELLSANKVRSFRNVREEESWQLIDSIRSSLGSPINYSTKVTGMANAIICRATIGKKCKYQDELIEVVEDIAYWGSGFFMADLFPKLKFLEYITGMRPKLEDMRRKLDHIFGHIINEHREKLASRNEQNIHDTDEDLIDVLLRINESQRLEFPITSNDIQGITLDMFTAGTDSTSATLQWIMSELMRNPRVMEKAQAEVRQALKGKTIIYEADIQGLSYLKLVVKETLRLHAPVPLLVPRECRKQCEIDGYTIPVGT…
AeCYP749A1	Arel.008777	ATGGATAATATTTCAGAATTCAACTCAATTACATTTCTTGTTAGCTCTATAAGCCTGTTCCTCCTCTCTATTTTCTTTAAATTTCTTCACAAAGTATTATGGACTCCAATTCGCATACAAAATATGCTGAACAAACAGGGAATAAAAGGCCCTTCTTACAGATTTCTTCATGGCAACACCAAACAAGTCTTGGAAATGATGAAAGAAGCTATGAGCCAACCCTTGGGTTTATCGCATCACATATTTCCTAGAATTCAGCCAAATATTTACTCTTGGATCATCATATATGGAAAGAATACTCTAAATTGGTATGGTCCTAAAGCTCAGTTAGTTGTGACAGAATTAGAACTTGTGAAACAAATATTGAGTGATAAAGATAAAGTTTATCCAAAGGCAGAT…	MDNISEFNSITFLVSSISLFLLSIFFKFLHKVLWTPIRIQNMLNKQGIKGPSYRFLHGNTKQVLEMMKEAMSQPLGLSHHIFPRIQPNIYSWIIIYGKNTLNWYGPKAQLVVTELELVKQILSDKDKVYPKADTEGFVKKLLGDGLVTSNGEKWAKQRKLANHSFHAESLRSMTPAMISSVEMMLERWKDHEGKEIEVFEEFRLLSSEVISKTAFGSSYLEGKDIFDMLIKLSVMLTRSNYKIRLPGLSRFLKNKDDIESEKIEVKIRDSIVKIVRKRENAINGEGGSSCSYGTDFLGLLVKAKNDADEANRITIQDVVDECKTFYVAGHETTTSLLSWTILLLGIHIDWQEKARQEVLNLFGHQNPDSDGIARLKTMNMIINETLRLYPPLTILLRKV…
AeCYP724B1	Arel.002106	ATGGGTGGGAGTTTTTGGATGGTCATGTTAGTTGGTTTTCTTGGGTTTTTGATGGGTCTCATCATAAACCATTTTTTGCCTTTGTTCTTGTTGAAGCTTAATGGCCAAGTACTTCCTAAAGGGACTTTTAGTTGGCCTCTACTTGGTGAAACCCTCTCTTTTCTCAACCCTCATCCTTCTAACTCTATTGGCACCTTTCTTCAACACCATTGTTCTAGGTATGGGAAGGTGTTCAAATCCCATTTATTCTTCACACCTACAATAGTTTCATGTGATGAAGAGCTCAACTACTTCATTCTACAAAATGAAGACAAATTGTTCCAGTGCAGCTATCCAAAGCCCATCCATGGAGTCCTTGGGAGCCTCTCAATGCTAGTGGCAGTTGGGGACACCCACAAG…	MGGSFWMVMLVGFLGFLMGLIINHFLPLFLLKLNGQVLPKGTFSWPLLGETLSFLNPHPSNSIGTFLQHHCSRYGKVFKSHLFFTPTIVSCDEELNYFILQNEDKLFQCSYPKPIHGVLGSLSMLVAVGDTHKRLRNVALSLVTTTKSNPQFLNDIENNAIQILDSWKLKKQVLFCEEARKFTFNVIVKQVLGLTPDEPQTSRILKDFLTFMRGLISLPLYIPGTPYAKAVQARKRISSSVKAIIEERRKNNAGNSSDNKRRSTDFLEILLCVDTLSLDEKVSFVLDSLLGGYETTSSLMAMVVHFLDQSPSALEQLKLEHQNIRSMKKKDASLNWDDYRKMEFTQHVINEALRYGNIVKFVHRKALKDVKYKDYVIPSGWQVLPVLSAVHLDTSLHAN…
AeCYP72A1	Arel.015891	ATGGGAGTACTACTAGTAGCTTCAGTTGTAATCTCAGTTGTTTTGGTTACAATTGTGAGCTTGACACACAAATTAGTGAATAGGCTATGGGTAAGGCCAAAACAGATAGAGAAGTACCTGAGAGAGCTGGGGTTTAGTGGCAATCCGTACAAGTTTTTGCACGGCGATATGAAAGAGTTCTCAAGGATATCAAAGGCAGCAATGTCGAAACCCATGGACTTCTCCCATGATGTTGGAGCCCGGGTTCTACCATATCACCATCATTTAGTCAAGAAATATGGTAACAACTCATTTATGTGGTTTGGAGCGAAACCAAGGTTAAATATCATGGATCCAGTGCTAGTCAAGGAGATTTTGTCTAAGCCTGATGAATTTCATAAAGTATACCCAGATCCAGTT…	MGVLLVASVVISVVLVTIVSLTHKLVNRLWVRPKQIEKYLRELGFSGNPYKFLHGDMKEFSRISKAAMSKPMDFSHDVGARVLPYHHHLVKKYGNNSFMWFGAKPRLNIMDPVLVKEILSKPDEFHKVYPDPVADLVVGGLSTAHGEKWPRHRKIINQAFNLEKLKGTLPEIYLSTTNIISTWKTLVSTTGTTEVDAWPYIENLARDMISRAAFGSNFEEGRRIFQLHEKQADLAFQFMGTSYIPWARHFKIKANRKMKRLNGEMIDQLSGIIKKREKALKMGQKINKNDLLSVLMEATRKEIQEEGTGMTMEEVVDECKVFYSAGADSTARLLVWTMILLSKHTDWQARAREEVLQLLGNKKEFDFELLNHLKIVTMILYEVLRLYPPAGMLLRATSK…
AeCYP78A1	Arel.020705	ATGAGAACAAATATAGAAAGCCTATGGGTTTTTGCTTTAGCTTCAAAATGCAAATCTTGCACTTCAATAAATTTCATATATTTTGTTTTAATCTCTGGTGTCGCTTGGTTTATCATGAGCTTAATTTACTGGGCTCACCCAGGTGGTCCAGCTTGGGGCAAGCATAAATGGAGAAAAACCACCTCTTCTTCTTCTTGCGCTGATAAGCCCACCATACCAGGCCCAAAGGGAGTTCCTTTTATAGGGAGCATGAGTCTCATGGGTGGTTTAGCCCACCACAAGATTGCAGCCATGGCTAAAGCTTGTGGAGCCAACCGGCTGATGGCTTTTAGCCTTGGCGAAACAAGAGTCATCGTTACATGTAATCCAGATGTAGCTAAAGAGATTCTCAACAGCTCC…	MRTNIESLWVFALASKCKSCTSINFIYFVLISGVAWFIMSLIYWAHPGGPAWGKHKWRKTTSSSSCADKPTIPGPKGVPFIGSMSLMGGLAHHKIAAMAKACGANRLMAFSLGETRVIVTCNPDVAKEILNSSVFADRPVKESAYSLMFNRAIGFAPYGVYWRTLRRIAATHLFCPKQIKASEAQRFDIARQMAAMFSGDNEKGMAINVREALKTASLNNMMCSVFGRKYHELDTSCNTEAGELRKLVDEGYELLGTLNWSDHLPWLSDFDPQKIRVRCSNLVPKVNRFVSRIISEHRADQTGGLNRDFVDVLLSLQGREQLSDSDMIAVLWEMIFRGTDTVAVLIEWVLARMVLHPDVQSRVHDELDTIVGRSRAVSEADIATMVYLPAVVKEVLRLH…
AeCYP71A1	Arel.031013	ATGGAAACTTTCTCAACGATATGGCTCCCTCATGTCCATGAAGCTTGGTTCTGTCCCAACTCTTGTAGTCTCTTCAGCAAGAATAGCAAACAAGTCTTTAAAACACATGATCTTGCATTTGCTAGTAGGCCATCTTTACATGGACAAAGGAAACTATCTTACAATGGATTAGATGTGGTCTTTTCTCCATATAGTGACTACTGGAGGGAGATGAGAAAAATTTGTGTTCTTCATCTTTTTAGCTCCAAAAGATCACATTCTTTTCGCCCTATTCGCGAAGATGAAGTTGCCCGTCTTGTGAAAAAGATATGTGATCTTGCTTCTTCTAAACTCGTCAATTTGAATGAAATCTTAATGACTCTTACTACCTGCATAATTTGCAGAGTTGCTTTTGGTAAG…	METFSTIWLPHVHEAWFCPNSCSLFSKNSKQVFKTHDLAFASRPSLHGQRKLSYNGLDVVFSPYSDYWREMRKICVLHLFSSKRSHSFRPIREDEVARLVKKICDLASSKLVNLNEILMTLTTCIICRVAFGKRYDEEGSERSRFQDIFNETQAMFGSFFVSDYFPLMGWIDKLRGISGRLEKNFKDMDSFYQELIDEHLNSERTSSMKGDILDILLQLKRDKLFSFDLTFDHIKGVLMNIVIAGSDTSLAAVVWAMTRLMQNPTQMKQVQEEIRKTIGKKGHVDEDDLQKLVYLKAVVKETMRLFPPAPLLVPRETIDSCVIEGYEIQPKTLVYVNAWAIGRDPEAWKNPEEFFPERFLGNPIDFKGQDFELIPFGAGRRGCPAIDMGTATTELTLAN…
AeCYP88A1	Arel.007582	ATGTCACCGGCACCTGAGGAGATTTCAGCAAATATGTGGGTGGCACTTGTGTTAGGAGTAGTCCCACTTATAGGGTGGGTGATGTGGTGGTGGAATGATCAGTGGTATGCTCTCAAACTCAAATTCCGGGGAGGTTTTCCTAGCGGCACCAAACTACCTCCGGGCCACATGGGCGTTGCCGTTTTCGGGGAAATGTTCAAATTCCTTTGGTATTTCAAGCTTCTTCGCCGTCCGGATGACTTCATTAACTCAAAGCGCACCAAGTATGGTGACGGTGAAGGGATATACCGGAGCCACCTATTTGGGTCACCGGCGATCATAGCGTGGTCCCCAGCAGTTAGCAAGTATATAATCCAATCAGGAGCAGAGTTCGTATCTGGATGGCATGGTACTGAAATT…	MSPAPEEISANMWVALVLGVVPLIGWVMWWWNDQWYALKLKFRGGFPSGTKLPPGHMGVAVFGEMFKFLWYFKLLRRPDDFINSKRTKYGDGEGIYRSHLFGSPAIIAWSPAVSKYIIQSGAEFVSGWHGTEILGTNSLIYLQGAAHTRLRNFVSRAINQPQALRGIALMVQPRLIAALQSWAHKGTIVAYNEAKKYQKKAMEIFRKELEKKKKELQDGAMNTNDLMDGMMRLKDDEGKQLSDSEVLDNILSLVVGGYESTSLAIMWALYYLPKYPNVLQKLREENMSLSKNKHGELPTSDDITKLIYTNKVVEETLRMANIASTIFRTATKDIVYLHTNPENFENPMCFNPDRWNEPAKPGAYQVFGGGSRICAGNMLARLQLAIFLHHLVTGYKWEL…
AeCYP72A2	Arel.032199	ATGGTAACTTTGAAAATGACTATGATTTACAACTTAATTGCAGCTTCTTGTTTTGTTGTTCTTATAGTTTATGCATGGAGATTTTTGGACTGGATTTGGTTTAAACCAAAGAAGCTAGAAAAAATCTTGAAACAACAAGGTTTCAGAGGGAACGCATATAGCCTGCTAGTTGGAGACCTTCACGATGGCTCGGAGATTATCAAAGAAGCCAACTCCAAGCCCATAAATTTGGATGATGATATTATGCCTCGTGTTATACCAATAGCATATAACACCATCTCCAAGTATGGTAAAAAATCCTTTACATGGGCTGGACAAATACCAAGAGTGCACATAACAGACCCTCAGCTGGCAAAGGAAATCGTATCTAAGTCTGATAATTTTCAAAAAAGTTTCAAG…	MVTLKMTMIYNLIAASCFVVLIVYAWRFLDWIWFKPKKLEKILKQQGFRGNAYSLLVGDLHDGSEIIKEANSKPINLDDDIMPRVIPIAYNTISKYGKKSFTWAGQIPRVHITDPQLAKEIVSKSDNFQKSFKTKNPLIDLLITGVIAFEGEKWRKHRRILNPAFQLAKLKQLLPAFHNSATDMMNKWEEILSKEGSVEVNIWPYLETFSGDAISRTAFGRSYIEGKRIIKLLKQLSEVTAEAMQSVYIPGMRFLPTKRNNIMKQLDQEVQVLLTDMINERTKTMKEGADGDDILSILLKSNFEEMQHGKNSGMTIHDVINECKLFYFAGQETSTILLCWTMILLARNPIWQTRAREEVLNVFGDEKPNNDGISRLKIVNMILNEVLRLYPPVAELTRI…
AeCYP96A1	Arel.033978	ATGGAAGCAATAGGCTACTCTGAAATGGTTCTAGCAGTTATATGCTTTCTCTTTTTATGGAGATTGCGCTACGACGATGGCCTCCCATGGAACTGGCCACTAGTTGGAATGATGCCACGTCTTTTATTCGTAATCAACCATGTTCACGAAGCTATCACAGATATTCTAGGGCTAGCCAGGGGTACTTTTCTCTTCAACGGCCCTTGGTTTGCTAACATGGACATGTTAGTCACGGTTGATCCAGCTAATGTGCACTATATTCTCAGTTCCAACTTCTCAAATTTTCCAAAAGGAGCTGAGTTCATGAAAATTTTTGATGTTTTGGGAGATGGGATTGTCAATTCTGATGGAGATTTGTGGAGGAGCCAGCGGAAACATGCTCGGGTTTTGCTTAATCAT…	MEAIGYSEMVLAVICFLFLWRLRYDDGLPWNWPLVGMMPRLLFVINHVHEAITDILGLARGTFLFNGPWFANMDMLVTVDPANVHYILSSNFSNFPKGAEFMKIFDVLGDGIVNSDGDLWRSQRKHARVLLNHHAFNHFLAKSSRDKLENGLIRVLEHVSKQCLVVDMQELFQRHTFDTTCMFVTGYDPGCLSTEFPEVPFAKAMDEAEEVIVNRHVMPQCVWKLQRWLNIGSEKKMSEAKKTIDNVLYTYISKKQKELCVKGIKCEENVENADLLTLYINEDDETLGLKGNDKFLRDIVLNHLIAGRDTTSSALTWFLWLVITHPEVETKIREELKANIPKNEAEKWRIFSEEELRKLPYLHGALCEALRLYPPVPFQHKEPIKPDILPSGHHVHPNM…
AeCYP76A1	Arel.011967	CTACCCCACAGAACACTTGCCGGACTTCAACAACAATACGGCCCTGTTGTTTGGTTAAAGCTAGGCTCTATTAACACATTGGTGGTTCAAAATGCAAAATCCGCCGCAGAATTGTTCAAAACCCACGATCTCGCCTTCGCTGATCGCTACGATACTGAAGCCCTGCGGACACATGGTTTCAACAAGGGGGCTATATCCGCATCTCTATACAACAACACGTGGCGCTTTCTAAGGCGGATAGGCACGGTGGAAATATTTGTTAACAAGAAGATTACGGAGACTTCCTCCATCAGGCAAAAATGCGTAAATAACATGATTCAATGGATAGAAAAAGAGGCGGATGAAGTAAAAGCGGGAGGTGGCAAAAATATTGTTGTCACAAGATTTGTGTTCTTAGCT…	LPHRTLAGLQQQYGPVVWLKLGSINTLVVQNAKSAAELFKTHDLAFADRYDTEALRTHGFNKGAISASLYNNTWRFLRRIGTVEIFVNKKITETSSIRQKCVNNMIQWIEKEADEVKAGGGKNIVVTRFVFLAAFNTLGNIMLSRDLADPESDVAKEFFEAMMGIMINGVDGNSQHFGLTSMARKKMNRDMGKGLHIVTGFVKERLKEDRESQKKDFLDMLLDFEGSGKDEPEKLSEHDEMFLAGSETTGTTVEWVMTELLRNPESIEKIKHEIAKVVGPNGKLQEGDTDNLHYLHAVLKETLRLHAPLPFLVPRKSTQDTSFMGYHIPKNTQVFVNAWAIGRDPECWDEPLSFKPERFLGSNLDYKGNHFELIPFGAGRRMCVGIPLAQRMAILILGS…
AeCYP716A1	Arel.006369	TTGAGACTCGCACCACCCCTCCAAGGAAGTTTCCGAAAAGTCCTTACTGATTTCGTGTACAAGGGTTTCTCAATTCCCAAAGGGTGGAAGTTCGATCCTACACGATTCGAAGGTTCGGGACCCGCTCCATACACATTTGTGCCTTTTGGAGGAGGACCAAGAATGTGCCCTGGAAAAGAATATGCCCGATTGGAAATACTTGTTTTCATGCACCACCTTGTGAAGAGGTTCAAGTGGGAAAATATAATTCCTGATGAAAAGACAATTTGTCAATCCCATGCCATCCCC	LRLAPPLQGSFRKVLTDFVYKGFSIPKGWKFDPTRFEGSGPAPYTFVPFGGGPRMCPGKEYARLEILVFMHHLVKRFKWENIIPDEKTICQSHAIP
AeCYP704C1	Arel.016352	ATGGATTTTATCTATGCCATCTTCATCTTCTTACTTACTGCATCGCTACTTCTTCTCATAACCTTCTCAGCTCTAATGTTGAAAATCTTCTCTAGAAAATCAATCAAAAACCCACAATACCCTCCAGTGGCTGGAACTGTATTTGGTCAGTTGTTTTATTTCAACAGGCTTCATGACTACCTAGCAGATATTGGTAAGAGACACCGTACTTTCCGGCTTCTTGCTCCAGATCAAAGTGAACTATATACAACTGATATGCGCAACATTGAGCATATACTTAAAACCAATTTTGATAAGTACTCTAAAGGTCAATATAATCAAGATATAGTAACAGACCTGTTTGGCCAAGGGATCTTTGCAATCGATGGTGTTAAGTGGCGGCAGCAAAGGAAGCTTGCA…	MDFIYAIFIFLLTASLLLLITFSALMLKIFSRKSIKNPQYPPVAGTVFGQLFYFNRLHDYLADIGKRHRTFRLLAPDQSELYTTDMRNIEHILKTNFDKYSKGQYNQDIVTDLFGQGIFAIDGVKWRQQRKLASYEFSTRVLRDFSCTVFRKNAAKLVRTISEFSMANTIFDIQDLLMRCTLDSIFKVGFGVDLNCLDGSSKNGSAFIKAFDDSNALIYWRYVDPSWQLKRFLNIGSEASLKKNIKIIYDFVHELISTKREQIEKQQNTNDKDDILSRFLVESKKDPEEMNDQYLRDIILNFIIAGKDTTANTLSWFFYMLCKNPLVQEKIAQEVREVISNHGDEGSIDDFVANITDQILEKMHYLHAALTETLRLYPAVPVDGRCAEADDILPDGFKL…
AeCYP72A3	Arel.011061	ATGGTGTGGTTGACACCTAAGAAGCTTGAGAAGTACCTGAAAGCTCAAGGTTTCGATGGAAATCCCTACAGACTTCTTTTTGGGGACATGATGGAGTATGCTACCATGAGTAAACAAGAAAAACCCAAGCACATCAATCTCTCCGACAACGTCTCCCTTCATGCCTTACCCTACATCCACCACATCATCAACAAATATGATCCAGAACTAATTAAGGAGATTCTGACTAAGCCCAATGTTTACCAGAAGCCACACCCAAACCCACTTGGTGACTTGATTACCGGCGGCCTCCTGTCTGCTGAGGATGAGAAATGGACAACACATAGAAAGTTAATTAACCCAGCCTTCCACCTAGACAAGTTAAAGAATATGTTACCAGCAATGCATTTGAGTTGTAAT…	MVWLTPKKLEKYLKAQGFDGNPYRLLFGDMMEYATMSKQEKPKHINLSDNVSLHALPYIHHIINKYDPELIKEILTKPNVYQKPHPNPLGDLITGGLLSAEDEKWTTHRKLINPAFHLDKLKNMLPAMHLSCNEMIEKWEMLVSTTGSAEVDVWPYLEDMSGDVISRTAFGSNHEEGRRIFLLQKEQVNLALHLMQLAFFPCWRYIPTKENKRMNKVCTELQVLLRGIISKREKAMQNGEVNDGDLLGILTESNSKEIKEQGIGMSIEEVIDECKLFYFAGSETTSNLLVWTMVLLSVHPEWQIRAREEVLQAFGSKKPDYDGLNHLKIVTMILQEVLRLYPPAAMLVRAIPKDTKLGDTNLPAGVGFILPVILLHYDHEIWGMDAHEFKPERFSEGVL…
AeCYP735A1	Arel.001956	ATGGAATTTCTTGGGTTTTTGAAAGATGCTGGTTTAGCTATGGTTGTATTTCTTTTGTTTATATTAGCTAGATTGGTATACACTTGCTGTGTTTTGCCTAACCTCGCCTACCGGAAGCTTAGGAAGAATGGACTAAATGGTCCATCTCCAAGTTTTCCTCTGGGAAATATTAGTGATATGATGAGATCAAAGACGAAGAAGATGAAGAGCGATTTGTCGTCGTCTTTAAGCATCATCACCCATGATATTCATTCGATCGTTTTTCCATACTTTGCTCAATGGCAAAAATCTCACGGGAAAGTGTTCATCTACTGGCTGGGGACAGAGCCATTTCTATATATTGCGGATCCAGAGTTTCTAAAGCGAATGTCTTCCGGTGTTTTGGGCAAAAGTTGGGGA…	MEFLGFLKDAGLAMVVFLLFILARLVYTCCVLPNLAYRKLRKNGLNGPSPSFPLGNISDMMRSKTKKMKSDLSSSLSIITHDIHSIVFPYFAQWQKSHGKVFIYWLGTEPFLYIADPEFLKRMSSGVLGKSWGKPSVFRNDRKPMFGKGLVMVEGDDWVRHRHVITPAFSPANLKAMGSLMVESTCNMLDRWTSRINSGQPEIDVEGEIISTAGEIIAKTSFGMSYENGKKVFEKLKAMQLTLFNSNRYVGVPFSKFMCPKQYLEAKRLGNEIDALLLSIINDRMKANNNGKGNTEKNLLGLMLADNCVEGRLVNSLTTRELVDECKTFFFGGHETTALTLTWTLLLLAMHPEWQNQLREEIKEVVGDEVVDATMLAELKKMGWVMNEVLRLYPSAPNV…
AeCYP72A4	Arel.012521	ATGTCAGATTATCTTCCCCAAGAAGTATTGTTCGATATCTTCGCAAGGCTCCCGCTCCAAACCCTCCTTCAGATCAGATCCGTCTGTAAACTATGGCACTCCACCATCTCCAAACCCACTTTCATCGCATCCCACATGAATCGTACAAAGCACGGCCACACACTCGTCCTCAGGCTTTTCTCTGAAAAAGAAAGGTTCAGCGGGAAAGAACACTATTTCTTACTGGATCAAAACCAAACAGGTGGCGTGCAAACTGAAAAGCTACCGTTTCCATTCAAGTGTAAGTCCAATTATCCATTTAGAATTGTGGGTTCTTGCTGTGGGCTAATTTGTTTGTCAGATGATAATGGGGATCATCCCTATGGTATAATTCTGTGGAACCCATCGATTAGAAAATTC…	MSDYLPQEVLFDIFARLPLQTLLQIRSVCKLWHSTISKPTFIASHMNRTKHGHTLVLRLFSEKERFSGKEHYFLLDQNQTGGVQTEKLPFPFKCKSNYPFRIVGSCCGLICLSDDNGDHPYGIILWNPSIRKFKKLPRPRVTHLTHGKYTCVLGFGFDRQKNDYKVVRLAYVKGRNGRDLIPPEVEVYGLNSGAWRSFNAGAPPYGILDTLFTRSQAFASGAIHWIGYDPCKGDCLNKLIVSFDIGNEVFGELMLPNCLVECEDLYVAEYGELLSMFEMKRRGKELYFNVWVMREYGFVESWMKLYSLDICEGVCRPIGFKNNEEVLYVTARGKLVSFNQNTIQTKGFGIKGATDSFYVGSYMESLVLLDGESAVLGADAIICDGGDEHEDVPQWPRAE…
AeCYP97B1	Arel.029794	ATGGCTATGGCTACTATCACTACCAGTTCTTGCCTGCTTCACTCCACCAATAAATCTTCTTCAAGACACTGTCAATTCCACTCTTCTTCCATCACTCATCTCTATAATTCTAAGCCCAAAGGGTCTTTTATCAGATGCCAATCAACTAGTACGGATGAAAGTAAAACAAAAAGGAATTTACTGGACAATGCAAGTAACCTACTCACTAATTTGTTAAGCGGGGGAAGTCTAGGTTCTATGCCTGTTGCTGAAGGTGCAGTTTCTGATCTGTTCGACCGGCCTTTGTTCTTTTCATTGTACGATTGGTTTATAGAGCATGGCCCGGTGTATAAACTTGCTTTTGGACCAAAAGCATTTGTTGTTGTGTCAGATCCCATCGTTGCAAGACATATTCTTCGT…	MAMATITTSSCLLHSTNKSSSRHCQFHSSSITHLYNSKPKGSFIRCQSTSTDESKTKRNLLDNASNLLTNLLSGGSLGSMPVAEGAVSDLFDRPLFFSLYDWFIEHGPVYKLAFGPKAFVVVSDPIVARHILRENTFSYDKGVLADILEPIMGKGLIPADISTWKQRRRVIAPGFHTLYLETMVKVFTDCSERTILKLENLLEKRSLSGQETIELDLEAEFSNLALDIIGLGVFNYDFGSVTKESPVIQAVYGTLFEAEHRSTFYIPYWKVPIARWLVPRQRKFHNDLKVINDCLDGLIRNAKETREETDVEKLQQRDYVNLKDASLLRFLVDMRGADVDDRQLRDDLMTMLIAGHETTAAVLTWAIFLLAQHPAKMQKAQAEIDSVLGHGTITFESLK…
AeCYP72A5	Arel.002148	CCCAATGAGTTTCACAAACCATACCCAGATCCAATAGTTGACCTAGTTGTTGGTGGACTTCTGGCGGCTCACGGTAAAAAATGGACTAAACATCGACAGATAATTAATCCAGCTTTTTATCGGGAGAAGTTAAAGTGTCTGTTACCGGCAATAAGCTTGAGCTGTGATGATATGATGAACAAGTGGGAAAAGTTAGTTTCGAGCAAGGGTTGTGAGGAAGTTAATGTTTGGCCTTGTTTAGAAGATTTAGCTGCTGATATGATGGCTCGAACACTATTGGACAGTAATCTTGAAGATGTTAGAACTATATTCCAACTTCATAAAGAACAGTTTTTTCCATCAAAAGGAATCAAAAGAATGAAACAAATTGAGGGTGAAATAACGGCCCAACTAAAGAGG…	PNEFHKPYPDPIVDLVVGGLLAAHGKKWTKHRQIINPAFYREKLKCLLPAISLSCDDMMNKWEKLVSSKGCEEVNVWPCLEDLAADMMARTLLDSNLEDVRTIFQLHKEQFFPSKGIKRMKQIEGEITAQLKRIIYKRKAAKKMGQENKDDLLGILLESNSKKTQEDDEGMQMSMEEVVTMILQEVLRLYPPTSMVLRATSKNTKLGNMTIPPWVHLTIPMIFHQYDPQIWGDDAKEFKPERFSQGIPNPSSFMPFSWGPRICIGHNFAMMEAKIAVAMILQRFSFQPSPSYVHAPELFFLLRPQYGAQLILHKLI
AeCYP714C1	Arel.026402	ATGGAGTTCCAATTCCAAATAACTGATTATGTGGTTAAAGTTTTAATGTCAGTTGGTTTGGTAGGGGTATTGGGATTGATTGGGCGCTTGTACATAGCGTTTGTGGTGAAGCCAAATAAGGTTCGATGGATGCTAAAAAGGCAAGGGATAAGCGGACCTTCGCCCAAGTTTCTACTTGGGAATATAATGGAGATCAAGAAGTCTAGAAGTGCACTTGTTAAGCCTTCAATTCCCACTGGACCTCCTGTTTCCCACAATTGTGGAGCTCTTCTCCTTCCCTTCTTAGATCCGTGGAAGAAACAATTTGGTGATGTATTCTTGTTTGCGCTTGGAAACAAACAAATTTTATTAGTGACTAAAGCTGATATATTAAGAGAGATCACTACATGCACATCCTTG…	MEFQFQITDYVVKVLMSVGLVGVLGLIGRLYIAFVVKPNKVRWMLKRQGISGPSPKFLLGNIMEIKKSRSALVKPSIPTGPPVSHNCGALLLPFLDPWKKQFGDVFLFALGNKQILLVTKADILREITTCTSLDFGKPSYQAKERGSLLGNGILTSNGHFWAHQRKIIAPELYMDKVKEMCNLITESTTTLLNSWNSIIEAQGGIVGDIEIDPHIRSFSGDVISKACFGSSFSKGKEIFFKLRALQEFYSKKVLSIGIPGMRYNLIFLKVNMHVTKIYP
AeCYP749A2	Arel.023401	ATGGGTGTTGTGGGAATTACCTCATTAATCTTTCTTTTGAGCTCTGTGTGTCTGTTCCTCCTTGTTGTTTTCATTAGGTTTCTACATCAAAGATGGTGGACTCCAATTCGCATACAGCGAATGATGAGGGCACAGGGAATCAAGGGTCCTTCATACAGATTCCCTCATGGAAACACCAAAGTAATCATAAAAATGAGGAAGGAATCCATATGCAAACCCATGGATTTATCACATTACATTTTTCCAAGAATTCAGCCTCACCTTTACTCTTGGCTTAACGTATATGGGAAGAATATTCTGAATTGGTATGGTCCTAGAGCTCAGTTTATTGTTACAGAACTAGAGTTTGTTAAAGAAATATTGAATAATAGAGATAAAGCTTATCAGAAAGTAGATACA…	MGVVGITSLIFLLSSVCLFLLVVFIRFLHQRWWTPIRIQRMMRAQGIKGPSYRFPHGNTKVIIKMRKESICKPMDLSHYIFPRIQPHLYSWLNVYGKNILNWYGPRAQFIVTELEFVKEILNNRDKAYQKVDTEGYIKKLLGDGLVTTSGEKWVKQRKLANHTFHAESLKNMTPAMIASVEMMLERWKHHQGKEIEVFEEFRTLTSEVISRTAFGSSYLEGKDIFKMLIKLAEMSSRNTYNPGLCKFLKSNDDIESDKLEQGIRDSILRIVEKREKAATMSGEVESFGTDFLGLLVKAKNDTDENNRITVQDVVDECKTFYVAGHETTMTLLAWTVFLLGIHTDWQEKARREVLKLFGQEHPNSDGIARLKTVC
AeCYP81Q1	Arel.009101	ATGGAGCCAAATTTGGTACTATTGTACACATCTTTCTCTATCCTCCTCCTCCTAATTCTCTCCACCAAATTATTTTCAAAATCAAAAACCCGCCTCCGTTTACCGCCGAGTCCACTCCTAAAACTTCCACTACTGGGCCACCTCCACCTCCTCAACGGCTCACCACTCCACCGGACCCTACACACTCTCTCCGCCAAGCTCGGCCCAATCTTCTCTCTCCAATTCGGGTCCCGCCTCGTGGTGGTGGTGTCCTCCGCCTCCGCCGCCGAGGAATGCTTCACCAAAAACGACATAATTTTGGCCAACCGCCCCCGTCTCACCATGGGGAAATACATGGGCTACAACTACACCACCGTCACCCAGTCCCCGTACGGCGACCACTGGCGGAACCTCCGCCGC…	MEPNLVLLYTSFSILLLLILSTKLFSKSKTRLRLPPSPLLKLPLLGHLHLLNGSPLHRTLHTLSAKLGPIFSLQFGSRLVVVVSSASAAEECFTKNDIILANRPRLTMGKYMGYNYTTVTQSPYGDHWRNLRRLGSLEIFSTARLNVFLSIRRDEINQLLNRLSNSSRHIFTKVDLKSNLNELSFNIITRMIAGKRYFGENVDDHKDGANSKHVREIIQKAFTQGGASHAADFLPILRWIDYKGFVKGLKGLSEEMDKVLEGIIDEHRNDDGNSRNSMVDHLLSLQKEQPDYYTDSIIKGLMMVMILAGTDTSAVTIEWAMSLLLNHPDTLRKARDEIDTIIGQDRLVEESDLSKLNYLQNIISETFRLFPAAPMLVPHESSADCTVGGYDVPRGTFLL…
AeCYP77A1	Arel.029393	ATGATTCCAATTTCATTTTCTTCTCTTTTCCCTTATTACCATATAATTTTCACCTTTTTAGCCTTCATTTTTTCGGGCCTAATTTTCTTGTTAACATGCAGAAAAAACTCAAAAAAAGTACCCAATCTTCCTCCGGGACCGCCCGGTTGGCCGGTTGTCGGAAATCTTTTTCAGGTGGCCGGCTCCGGCAAGCCCTTTTTTCAATATGTGAAAGATTTGATTCCCAAGTATGGTCCAATATTGACTCTTAAGATGGGCACTAGAACTATGATAATTATTAGTAGTGCTGATCTGGCCCATGAGGCTTTAATTGAAAAGGGTCAAGTTTTTGCTAGCCGGTCTAAAGAAAATTCGACCCGAACTGTATTCAGCTCCAACAAGTTAACGGTGAATTCGTCG…	MIPISFSSLFPYYHIIFTFLAFIFSGLIFLLTCRKNSKKVPNLPPGPPGWPVVGNLFQVAGSGKPFFQYVKDLIPKYGPILTLKMGTRTMIIISSADLAHEALIEKGQVFASRSKENSTRTVFSSNKLTVNSSDYGPVWRSLRRNMVQNMLSSSRIKGFRRVRDGAMDKLVDRIKVEAEQNDGAVWVLKNARFAFFCILLTMCFGIEMDEEMIERVDYMMKTVLITLTPRLDDFLPLLSLFFSKQKKRVTQVRKEQIETLVPLIKRRRLALQNPGSDKTATSFSYLDTLFNLQIDGRKSSLSDAEIVTLCSEFLNGGTDTTGTAIEWAIARIIENPNIQSKLYEEIKSVVGDRKVDEMDMERMSYLNAMTKELLRKHPPTYFLLTHAVTEPAKLAGYDI…
AeCYP72A6	Arel.012512	ATGGAGTTATTAATTTCAAGCTTTTGTGCAATTGTTGTGGTGATATTGGGATGGAAAATTTTCAATTGGGTTTGGCTGAGACCAAGAAAGCTTGAAAAGTACCTGAGAAATCAGGGTTTCAATGGAAACTCGTACAGATTATTTTTTGGAGACCTGAAAGATATGGTTGTAATGATAAAAGAAGCCAAATCCAAACCCATCAATCTCTCTGATGATATTATCCCCCGCATCATTCCCCTCAACTATAAAACCATCCAAACCTATGGAAAGAACTCATTTTTATGGCTTGGACCAAAACCAGTGGTCCATATTATGGATCCTGATCATATCAAAGAGGTCTTGACCAAGTTTTATCAGTTTCAAAAGCCAAGGGATAATCCTTTAACAGCATTGCTTGCA…	MELLISSFCAIVVVILGWKIFNWVWLRPRKLEKYLRNQGFNGNSYRLFFGDLKDMVVMIKEAKSKPINLSDDIIPRIIPLNYKTIQTYGKNSFLWLGPKPVVHIMDPDHIKEVLTKFYQFQKPRDNPLTALLATGLIDAEGDRWAKHRKLINPAFHLEKLKNMLPAIYLSSSEIMTKWEEMVSTKGQFELDVLPYLETFTSDVISRTAFGSSYEEGRKIFQLQREQAELLIQTSQTIYLPGMRFLPTKRNKRMKEIAKEVKLALKSIINKRLQAMEAGECSHDDLLGILLESNSKEIKQHGNKKFGMTIDEVLEECKLFYFAGQETTSNLLVWTMILLSQHQDWQKRAKEEVLREFGNNKPDLDGLNRLKVLISSFCAIVVVILGWKIFNWVWLRPRKL…
AeCYP735A2	Arel.001958	ATGGAATTTCTTGGGTTTTTGAAAGATGTTGGTTTAGCTATGGTTGTATTTCTTTTGTTTATATTGGCTAGATTGGTATACACTTGCTGTGTTTTGCCTAACCTCGCCTACCGGAAGCTTAGGAAGAATGGACTAAATGGTCCATCTCCAAGTTTTCCTCTGGGAAATATTAGTGATATGATGAGATCAAAGACGAAGAAGATGAAGAGCGATTTGTCGTCGTCTTTAAGCATCATCACCCATGATATTCATTCGATCGTTTTTCCATACTTTGCTCAATGGCAAAAATCTCACGGGAAAGTGTTCATCTACTGGCTGGGGACAGAACCATTTCTATATATTGCGGATCCAGAGTTTCTAAAGCGAATGTCTTCCGGTGTTTTGGGCAAAAGTTGGGGA…	MEFLGFLKDVGLAMVVFLLFILARLVYTCCVLPNLAYRKLRKNGLNGPSPSFPLGNISDMMRSKTKKMKSDLSSSLSIITHDIHSIVFPYFAQWQKSHGKVFIYWLGTEPFLYIADPEFLKRMSSGVLGKSWGKPSVFRNDRKPMFGKGLVMVEGDDWVRHRHVITPAFSPANLKAMGSLMVESTCNMLDRWTSRINSDQPEIDVEREIISTAGEIIAKTSFGMSYENGKKVFEKLKAMQLTLFNSNRYVGVPFSKFMCPKQYLEAKRLGNEIDALLLSIINDRMEANNNGKGNTEKNLLGLMLADNCVDGRLVNSLTTRELVDECKTFFFGGHETTALTLTWTLLLLAMHPGWQNQLREEIKEVVGDEVVDATKLAELKKMGWVMNEVLRLYPSAPNV…
AeCYP734A1	Arel.011722	ATGGAAGAAGAGCAGATGATCAAAGTGTTTCATGTTGTGTGTTTTATTGGGGTGGTTTTTGTGCTAAAGATTATGGTTATGTTGTGGTGGAGGCCCAGAAAGGTTGAACAACATTTCTGTAAGCAAGGAATCAGAGGCCCCCCTTACCGGTTCTTGATAGGCAATGCCAAGGAAATTGTGAGCCTAATGTTGAAGGCCTCTTCTCAACCCATTCCTTTTCCTTACTCTCACAATATTCTCCCTAGAGTCCTCTCCTTTTACCACCACTGGAAGAAAATTTATGGTTCAACATTTCTTGTGTGGTTTGGACCGACCGCTCGCCTCACTGTGGCTGATCCAGATCTTATTAGAGAAATATTTTCCTCAAAATCTGAATTTTATGAGAAAAATGAAGCTCAC…	MEEEQMIKVFHVVCFIGVVFVLKIMVMLWWRPRKVEQHFCKQGIRGPPYRFLIGNAKEIVSLMLKASSQPIPFPYSHNILPRVLSFYHHWKKIYGSTFLVWFGPTARLTVADPDLIREIFSSKSEFYEKNEAHPLIKQLEGDGLLSLKGEKWAHHRKIITPTFHMENLKLLIPVAAHSVVEMLDKWLEMSESGGVEIEVSKWYQTLTEDIVTRTAFGRSYEDGKSIFQLQSQQMALASEAFQKVFIPGYRFLPTKRNMKSWKLEKEVKKCLMTVIEERRENWENEILEKGPKDLLGLMIQASTKESVKKTTELNPSPASPITVHDIAEECKSFFFAGEQTTSNLLTWTTVLLAMHPQWQVLARDEVLKVCGSRDIPSKDDVSKLKMLGMILNETLRLYP…
AeCYP749A3	Arel.017591	ATGGATGATGTGGGAATTATATCAACAGTCTTTCAGTTTCTTTTGAGCTCTCTATGTCTGTTCTTCCTCTTTGGTTTCATTAGATTTCTAAATGAGATATGGTTGACTCCAATTGGCATACAGCGAGTCTTGAGTCAACAGGGAATCAAGGGGCTTTCTTACAGATTCCCTCACGGAAACACCAAAGAAATCATTAACATGAGGAAGAAATCCATGAGCGGACCCATGGACTTATCACACCACATATTTCCAAGACTTCAGCCTCACCTTTACTTTTGGCTTAGCATATATGGGAAGAATTTTCTGAATTGGTATGGCCCTAGAGCTGAATTTATAATTACCGAAGTAGAGTTTATTAAAGAAATAATGAATAGAGATCAATCTTATCCAAAAATAGAC…	MDDVGIISTVFQFLLSSLCLFFLFGFIRFLNEIWLTPIGIQRVLSQQGIKGLSYRFPHGNTKEIINMRKKSMSGPMDLSHHIFPRLQPHLYFWLSIYGKNFLNWYGPRAEFIITEVEFIKEIMNRDQSYPKIDMEWYAKRLLGDGLATSKGEKWAKQRKLANHTFHAESLKNMTPAMIASVEMMLERWKQHDGKEIEVFQEFRFLTSEVISRTAFGSSYLEGKDIFDMLIRLVIIYSRNCFIVKLPGLGRYFKSSDEIEADKLEQRVHNSILRIMEKREKTSTTSGEVRSLGNDFLGLLMKAKNDADEKNRITVQDVVDQCKTFYVAGQETTTTLLAWIVFLLGIHTDWQEKARQEVLKLFGQDNPNSDGIAKLKTVYVNNRLKDSFGLNFATNEAKIA…
AeCYP736A1	Arel.022073	ATGAGAAAGGAGGAGCTTGGGTTATTGGTGAAGGAGCTTAAGGATGCCGCCGCTAAATGTGAGGTGGTGGATATTAGTGCAAAGGTGGCTGATCTTATTGAAAACATGACTTATAGGTTGCTTTTGGGACGTAGCAAAGATGATAGGTTTGATCTCAAGGGTATTATGAATGAGGCCTTCCTGTTGGCTGGAAAGTTCAATCTTGCAGATTTTGTGCCTTTCCTAGCCCCACTTGACATTCAGGGATTGACTCGAAGCTTTAAGGAAGCCGGCGAGAAACTTGACAAAATGTTGGAGCTAATTATTGATGAGCATGAACAAAACGCAAGTAATGGACTTCAAAAGAAAAATACCGACTTTGTCGATGAAATGCTATCATTGATGAAAAATTCCACAAGC…	MRKEELGLLVKELKDAAAKCEVVDISAKVADLIENMTYRLLLGRSKDDRFDLKGIMNEAFLLAGKFNLADFVPFLAPLDIQGLTRSFKEAGEKLDKMLELIIDEHEQNASNGLQKKNTDFVDEMLSLMKNSTSTHHELAKAIDRSSIKSIMVDIITAAIDTSYTSIEWILAELIRHPRVMKKCQEEVNTIVGLDRMVEETDLPKLEYLYMVVKEGLRLHPIAPLLGPHESREDIVIDGYYIPKKSRVIVNAWALGRDPNVWSEDVEEFLPERFTRSKIDLRGRDFQLLPFGSGRRGCPGMQLGLINIQFVLAQLLHCFDWELPSGISTGDLDMTEKSGLTIPRIQHLLLVPKVRI
AeCYP736A2	Arel.031151	GGATTGACTCGACGTTTCAAGGCACTGCACAAAGATCTTGACAAAACCTTGGAGAAGATTGTTAATGAGCATGAAGAAGCTGCTACTAGTGGAAGTAAAAAGCTTGACCCGGATTTCGTCGATGTACTACTATCATTATTGGATAAATCTTCAGAAAAAACTTATGCTGAGCTATCACACATGCTAGATAGAAGAACCCTAAAAGGAATTATAGTAGATATGATAGCAGCCGGTATTGATACTTCACACACTGCAATTGAATGGATCATGACTGAACTCATAAGACATCCGAGGATCATGAAACAACTTCAAGAAGAAATTAAGAGTGTTGTTGGAGTTAATGAGATTATAGAGGAGACTGATTTGACTAAGTTTACGTACCTAGACATGGTGATTAAA…	GLTRRFKALHKDLDKTLEKIVNEHEEAATSGSKKLDPDFVDVLLSLLDKSSEKTYAELSHMLDRRTLKGIIVDMIAAGIDTSHTAIEWIMTELIRHPRIMKQLQEEIKSVVGVNEIIEETDLTKFTYLDMVIKETFRLHPVVPLLVPRESMEDIVIDEYYIPKKSRVLINSWTLGRDPDLWSENVEEFIPERFIAGVDFFGHDYKFLPFGSGRRICPGMHLGLINVRQIVAQLVHCFDWELPNGMSLGDLNMDEKFGLTLPRAQHLLAMPVRRL
AeCYP96A2	Arel.017639	ATGTTTGATACAACCTGTATGGTGGTAACTGGCTATGACCCTGGATCACTCCGAACTGGGTTCCCTGAAGTTGCATTTTCGAGGTCCCTAGACGAAATTAGTCAAGCAATATATTTATGCCTTATTTTGCCAGAAAGGATTTGGAAACTACAAAGGTGGCTAGGGGTTGGGGAAGAAAAGAAATTGAGTACAGCTCGGAAAACTTTAGATGAAATTGTGGAAAAGTATATTACAATAAAGCAACAACAGTTAAGTTTCTCCGATGATGATGATCAAGAGAGTTTCGATACATTGAAATGCTTTTTGACAAAAGATGAGATCGGTGGATCGATAGCTCACCCCTATGGTACAATTAGAGACACCATTATAGGTCTCACGTTCGCAAGGCGAGACACAACT…	MFDTTCMVVTGYDPGSLRTGFPEVAFSRSLDEISQAIYLCLILPERIWKLQRWLGVGEEKKLSTARKTLDEIVEKYITIKQQQLSFSDDDDQESFDTLKCFLTKDEIGGSIAHPYGTIRDTIIGLTFARRDTTSVVLTWFFWLISGNPFVESKIRKELEANLPVNEEEKCRVMFNKELLNKLTYLHGSLCETLRIYPPIPFQRRAAVQGDILPSGHNVGPNMNIVICSYAMGRMKSIWGEDCLKFKPERWITERGVIKVEPSNKFQVFSSGPRICPGRELAFTRMKAVAATIIHNYHVQVVKSEPATPVTSIILHMKDGLKVRVTKR
AeCYP81Q2	Arel.002482	ATGTCCCTTCTACTCAACCATCCAGAGGCTCTAAAAAAGGCCAGGGCCGAGCTCGACAAACACGTCGGCCACGAGCGTTTAGCCGACGAACAAGACCTTCCAAAACTGTCATATCTCCAAAACATTGTCAACGAAACATTCCGACTATTTCCAGCCGCGCCACTGCTAGTGCCACACGAGTCATCACACGACTGCACCATCGGAGGCTTCGATATCCCACGTGGCACAATGCTGTTGGCCAACGCGTGGGCGATTCACCGGGACCCTAAGGTGTGGGATGATGCTACAAGTTTTAAGCCAGAGAGATTTGAAGGGGAAAAACGCGACGAGATGTACAAATTAGTGACATTTGGGTTGGGAAGGAGGCAGTGCCCCGGGATTGTTCTTGCTAATAAAGTG…	MSLLLNHPEALKKARAELDKHVGHERLADEQDLPKLSYLQNIVNETFRLFPAAPLLVPHESSHDCTIGGFDIPRGTMLLANAWAIHRDPKVWDDATSFKPERFEGEKRDEMYKLVTFGLGRRQCPGIVLANKVISLSLAGLIQCFEWERIGEELVDLTEGKGLTMPKAKPLQAMCKARVNMINVLSEL
AeCYP725A1	Arel.000453	ATGGCTGTGTTCATGAATTTTTCTATTTCTTTGACCTTCTCTGTCTTTGCTCCACTGTGCATTTTGATCATCATGTTGTTGATTCACAGAAAAAGGAATAGCCACAAAAGCAACAAGTTACCACCGGGGGAAATGGGACTTCCTTGGATTGGTGAAACAATCGACTTTTATAAATCCCAACAGAAAAACCGGTTGTTCGAGGAATTCGTTCAACCTCGTATTACCAAACATGGGAAAATCTTCAAAACAAGGTTGATGGGATCACCAACAGTGGTCGTAAATGGAGCTGAAGCTAATCGTTTCTTCATGTCGAATGAGTTCAAGCTAGTAATAAGCTCATGGCCCTCTTCATCGGTCCAGCTCATGGGAAACAACTCCATCATGGAAAAACAAGGCGAA…	MAVFMNFSISLTFSVFAPLCILIIMLLIHRKRNSHKSNKLPPGEMGLPWIGETIDFYKSQQKNRLFEEFVQPRITKHGKIFKTRLMGSPTVVVNGAEANRFFMSNEFKLVISSWPSSSVQLMGNNSIMEKQGEAHRLLRGVIATSLGPAGLEAIVPKMCNSIQLHLEKNWHSSETISLYRNAKILTFTIVFECLFGIGVEPGMLGIFERVLEGVFAPAISFPGSKFSRAKRARMEIEKILVEVVRRKRDEMEGRPEEVGEEEKMLLSRLVAGLIRGEISEEEVVDNVVLLVFAAHDTTSFAIAMTFRMLAQHPDCYSLLLQEHAEIMSNKRHGESLTIEDTKKMKYTWQVARESMRLFPPIFGSFRKAVADIEYEGFTIPRGWKVLWTAYGTHYNEEYF…
AeCYP71D2	Arel.033420	ATGGTAGCTATAATGGCTCTCCAATACTCCCCAAACTCAATCATCTTTTCCCTCATTCTCCTCACCTTTTTCCTGTTTAAGTTAGCCAAGGAACTGAAAACATCCAAAACTCAAAAACTCCCCCCTGGGCCATGGAAGTTACCTGTCATTGGAAATATGCTCCAATTGGCTGGTACACTACAAACACATAGCCTCAGAGACTTGGCCATGAAATATGGACCTGTCATGAGCCTACAACTGGGCGAAGTTTCTGCCGTTGTTATATCATCTGCTCGAGTAGCAAAAGAGGTTTTGAAAACTCACGATATTGCCTTCGCAGACAGGCCAAGGGTTATAGCCAACAACATTATTTTGCGCAACGGTAAAGACTTGGTTTTTGCCCTCTACGGTAACTACTGG…	MVAIMALQYSPNSIIFSLILLTFFLFKLAKELKTSKTQKLPPGPWKLPVIGNMLQLAGTLQTHSLRDLAMKYGPVMSLQLGEVSAVVISSARVAKEVLKTHDIAFADRPRVIANNIILRNGKDLVFALYGNYWRQMRKICTVELLSANKVSFFRSIREEEAWRLVQSVQSSLASPINLTKRFLSLTNAVTCRATIGKKSQYQDELIQLIEDTASLAGGFDISDLFPSIKLLHVLSRMKPKLQTIRRKLDKIIDNIILEHKENWESTNKGDSLEGEEDLVDVLLKVQKRGGLEFPITADDIYGIIVNMLIGGTDTSATALEWAMSELMRNPQVLEKAQAEVRQALKGKTTIHETDIQGLSYLKLVIKETLRLHPPLALLLPRKCREECKIDGYHIPINTK…
AeCYP71D3	Arel.033444	ATGTGTATAAAAGAGAGTACACTTAGCGAGCAACATCAAGAAGTCCAGTGCAGACAAAAAAGATTATTGAAACATCCAATGGAGCTCCAATTTTCCCCCTTCTCTGTTATCATTTCCCTAATAATTTTCTCTCTATTTCTCTTCAAGCTCTTCAAAAGATCCACACCCAATAACCTTCCCCCGGGTCCGACCAAGTTACCGATCATCGGAAATCTGCACCAACTGGCACGTGTCGACCCGATACCGCGTCGCGGCCTCCTAGAATTGGCTCAGAAATACGGACCATTGATGCACTTACAACTTGGCAAAATCTCGGCAATTGTGGCGTCGACGCCACGGGCGGCGAAAGAGGTACTGAAAACGCATGACCTTTCTTGTGCGGATAGGCCGGATATGTTA…	MCIKESTLSEQHQEVQCRQKRLLKHPMELQFSPFSVIISLIIFSLFLFKLFKRSTPNNLPPGPTKLPIIGNLHQLARVDPIPRRGLLELAQKYGPLMHLQLGKISAIVASTPRAAKEVLKTHDLSCADRPDMLLGRIMLKNSRDIVLAPYGDYWRQMRKISTSELLSANKVRSFRNIREEESWQLVESVRSSVGSPVNFSTQVTGMANAVICRAAIGKKCAYQDELIEVVEDIGYWGSGFFMADLFPSLKFLEYVTGMRPKLQKMRRKLDHIFENIIQEHKEKVASKKVNDNEEDLIDVLLRIKESQSLEIPITSKDIQGITLDMFTAGTDSTSATLQWMMSELMRNPQVMKKAQAEVREALKGKTIIYEADIQGLTYLKLVIKETLRLHAPVPLLVPR…
AeCYP71D4	Arel.033431	ATGGAGTTTCAGCCCCCTTTGGCTATCATCACTTCCTTCATCCTCCTCTTCCTCTTTCTAGTCAAGTTATTCAAAAGATCCAAACCCGAGAAACTGCCCCCCGGACCACTAAAACTACCTTTCATAGGAAATTTGCTTCAAGTGGCCCGTGCAAATCCGATACCACACCATGGCCTCCTCGAGTTGGCCACAAAATATGGACCTTTAATGCATCTACAGCTCGGTAACATTCCAGCTATAGTGGTATCATCGCCACGAGTGGCGAAAGAGGTACTAAGAACACATGACCTTGCATGTGCAGATAAGCCAGATATGTTACTAGGCAGAATTATGTTAAAGAATAGTAGGGATATTGTTTTGGCCCCCTATGGTGATTACTGGAGGCAAATGCGCAAAATT…	MEFQPPLAIITSFILLFLFLVKLFKRSKPEKLPPGPLKLPFIGNLLQVARANPIPHHGLLELATKYGPLMHLQLGNIPAIVVSSPRVAKEVLRTHDLACADKPDMLLGRIMLKNSRDIVLAPYGDYWRQMRKISTTELLSANKVRSFYNIREEESWQLIESVRSSLGSPFNFSIKVTAMANSVICRATIGKKCKYQEELIELVEDITYRGSGFFMADLFPSLKFLEYVNGMRPTLEKMRRKLDHIFSNIIDDHKEKLARRKEQNVSDVDAKDEDLIDVLLRINEGQQLEFPITSNDIQGTTLDMFTAGTDSTSATLQWIMSELMRNPRVMEKAQAEVRHAFKGKTIIHEANIEGLSYLKLVIKETLRLHAPVPLLVPRECRKKCEIDGYTIPVGTKVIV…
AeCYP736A3	Arel.031149	GGATTGAGTCGACATTTCAAGGCACTGCACAAAGATCTTGACAAAACCTTGGAGAAGATTGTTAATGAGCATGAAGAAGTTGCTACTAGTGGAAGTAAAAAGCTTGACCTGGATTTCGTCGATGTACTACTATCATTATTGGATAAATCTTCAGAAAATACTTATGCTGAGCTATCACACATGCTAGATAGAAGAACCCTAAAAGGAATTATAGTAGATATGATAGCAGCCGGTATTGAAACTTCACACGTTGCAATTGAATGGATCATGACTGAACTCATAAGACATCCGAGGATCATGAAACAACTTCATGAAGAAATTAAGAGTGTTGTTGGAGTTAATGAGATTATAGAGGAGACTGATTTGACTAAGTTTAAGTACCTAGACATGGTGATTAAA…	GLSRHFKALHKDLDKTLEKIVNEHEEVATSGSKKLDLDFVDVLLSLLDKSSENTYAELSHMLDRRTLKGIIVDMIAAGIETSHVAIEWIMTELIRHPRIMKQLHEEIKSVVGVNEIIEETDLTKFKYLDMVIKETFRLHPVVPLNIRESMDDIVINGYYIPKKSRVLINSWTLGRDPDLWSKNVEEFIPERFIAGVDFFGHDYKFLPFGSGRRICPGMHLGLINVRQIVTQLVHCFDWELPNGMSPSDLNMDEKFGLTLPRAQHLLAIIS
AeCYP716A2	Arel.025442	ATGGACCTTCTCTTCATCCTCTCTGCTCTTGGAATCATCTTCATCTCTCTCTTTTTCCACCATTCTCTCTCCAAAAGCAAGCCAAAATCTGGAGCTCCATATCCTCCTGGAAGATCCGGCTGGCCACTCTTAGGCGAAAGCCTCGATTATTTCTCAAAACTCCGAAATGGCATGAACGAAAGATTTGTAATGGACAGGGTACAAAAATACTCCTCCAGAGTCTTCAAATCAAACGTGCTCGGGGAGAAAATGGCATTTTTGCCCGGGGCCGAGGGCAACAAGTTCTTGTTCTCGAATGAGAACAAGTTTGTCCAGGTCTGGTGGCCGAGCTCAGTTAACAGTGTTTTTTTGAAAACTGATAATCGGTCAGCTCAAGATGAATCAATTAAAGTACGCAGA…	MDLLFILSALGIIFISLFFHHSLSKSKPKSGAPYPPGRSGWPLLGESLDYFSKLRNGMNERFVMDRVQKYSSRVFKSNVLGEKMAFLPGAEGNKFLFSNENKFVQVWWPSSVNSVFLKTDNRSAQDESIKVRRLLPPFLKAEALKAYVGIMDTVCKKHLDTHWVGSQVQVCPLVRKYTFTLACNLFLSLKDPENLEKLNKIFDDVACGIVSIPINLPGMSFYKAIKASQEIRGVIEGMVKQRKIDIAENEATPTQDVMSHMITAMAENKSEDPITDADIASDLLGLLIGGYDTINTTLVFIMKFLAEQPHVYEEVLKEQTEIANLKQGKLLSWEDLRKMKYSWSVWCEVLRIRPPTVGAFRVAIADFAYGGYTIPKGWKLHYIPHVTHKNPEYFPNPDK…
AeCYP716A3	Arel.029447	ATGGATTTCCTCTACATTTCTCTACTATGCCTCCTCTTTGTTCTCTTGGTTTCTCTGTCTCTCCACTTCCTCATTTTCTACAAAAACAAATCCTCCTCCGGCAAGGCCCCACCGGGTAGGACCGGATGGCCGGTCATCGGAGAAAGCCTCGAGTTTCTCTCCACCGGGTGGAAAGGACACCCGGAGAAATTCATATTTGACCGAATGACCAAATATTCCTCCAGTGTCTTCAAGACCTCACTCTTAGGAGAACCGGCCGCAGTCTTTTGCGGCGCTGCCGGTAATAAATTCTTGTTCTCCAATGAGAACAAGCTAGTCCAAGCTTGGTGGCCTGCCTCAGTTGACAAACTATTCCCATCATCAAACCAAACCTCCTCAAAAGAAGAAGCCATCAAAATG…	MDFLYISLLCLLFVLLVSLSLHFLIFYKNKSSSGKAPPGRTGWPVIGESLEFLSTGWKGHPEKFIFDRMTKYSSSVFKTSLLGEPAAVFCGAAGNKFLFSNENKLVQAWWPASVDKLFPSSNQTSSKEEAIKMRKMLPNFFKPEALRQYVGIMDQITQRHFSSGWENKEQVVVFPLTKRFTFWLACRLFISVEDPDHVAKFADPFDLLASGLISIPIDLPGTPFRRAIKASNHIRKELSGIIKQRKIDLAEGKATPTQDILSHMLLTSDENGKFMNELDIADKILGLLVGGHDTASSACAFIVKYLAELPEFYDGVYKEQMEIAKSKGPGELLNWDDLQKMKYSWNVACEVLRLAPPLQGAFREAMTDFMYNGFAIPKGWKLYWSANSTHRNSEFFPEP…
AeCYP716A4	Arel.005075	ATGAGGAGGGTGATATGGCAGCAATGGTGTTTTTTTCCACCCTATCCCCTCCCCCCAGGTCAAACAGGTTGGCCTTTGATAGGCGAAACTCTGAATTATTTATCTAGCATCAAAAGTGGGTTTCTTGAAAATTTTGTGAAATATCGGAAGGAAAAGTATTCCCCCAAAGTTTTCAGGACATCACTCTTAGGAGAATCAATGGCAATCTTGTGTGGGCCAGAGGGGAGCAAATTTCTCTACTCAATGGAAAATAAGCTAGTCCAAGTTTGGTTCCCGAGCAGTATTAAAAAGATGTTCCCAAGATCTCATGGCGAATCCAACGCAGAGAACTTCTCCAAAGTACGCGGTAAAATAATGTTTCTACTCAAGGTGGATGGGCTGAAAAAATATGTTGGACTA…	MRRVIWQQWCFFPPYPLPPGQTGWPLIGETLNYLSSIKSGFLENFVKYRKEKYSPKVFRTSLLGESMAILCGPEGSKFLYSMENKLVQVWFPSSIKKMFPRSHGESNAENFSKVRGKIMFLLKVDGLKKYVGLMDRVMKQFLETEWNRQQQINVHNTVKKYTVTMSCRVFMSIDDEEQVRKLGSSIHNIEAGLLALPINIPGTAMNRVIKTVKLLSRELEADLLSHLLLTANQDDRFLNQSDIASHLLGLMQGGYTTLNATITFVINYLAEFPDVYNQVLKEQVKIANSKKHPKELLNREDLRKMKYSWNVAQEGKESGLYVVNRATKFANLLFIINTHKHPTQHHDGVFLNRVMNIDMLLAIPLCL
AeCYP736A4	Arel.031580	ATGTTCCCCTTAGCATATCCCCTTCTTTTCCTCCTCCTTGGAGCTCTCTCATGGTGGATACTCCCCATCATATCTCCACTAAAACGCCACCATAAACTACCACCAGGTCCCCGAGGCTTACCAATTATTGGTAGCCTCCACACGTTAGGCGCCCTCCCCCACCGCACCTTACAAACCCTAGCCAAAAAGTATGGTCCTATCATGTCCATGAGGCTAGGGTCCGTGCCAACTATAGTAGTCTCTTCACCTCAAGCTGCCGAGCTTTTCCTCAAGACTCATGACAATATTTTCGCTAGCCGCCCTAAGGTCCAAGCGGCCGAGTACATGTCCTATGGTACTAAGGGCATGGCCTTCACCGCATACGGTCCACATTGGCGCAACATAAGAAAATTTGTTGTG…	MFPLAYPLLFLLLGALSWWILPIISPLKRHHKLPPGPRGLPIIGSLHTLGALPHRTLQTLAKKYGPIMSMRLGSVPTIVVSSPQAAELFLKTHDNIFASRPKVQAAEYMSYGTKGMAFTAYGPHWRNIRKFVVLELLTPAKINSFVGMRREELGIVVMSIKEASAANEVVDLSAKVADIIENMTYRLLLGRTNDDRYDLKGIMKEALALAGKFNVADFVPFLGPLDIQGLTRQFKDTSKRLDKILEFIIDEHEQNASNGNASGDFIDDMLSLKNKPSNTHDELSKVIDRSVIKAIMVDIISAAIDTSDTSIEWILTELIRHPRAMKKCQEEIDAIVGVDRMVEETDLPKLEYLYMAVKEGLRLHPVAPLLGPHESMEDITINGYFIPKQSRVIVNSWAL…
AeCYP736A5	Arel.031177	ATGTTTCCATTGGCATTTTCTCTTCTCTTCCTCCTCCTTGGAGCATTATTTTGGCTCAAGAATCGACACGGCCGCAACCCAAAGGAGGGTAATTTGCCACCACTGCCACCAGGTCCCCGAGGGCTACCAATTATCGGTAGCCTCCACTTGTTAGGCGGCCTCCCCCACCGCGCCCTCGAGAAGTTATCCAAAAAATATGGTCCTATCATGTCCATGCGGCTAGGCTCCGTGCCAGCTATCGTCGTCTCGTCGCCTCAAGCTGCCGAGCTTTTCCTCAAGGCTCATGACATTGTTTTCGCTACCCGGCCTAATACCCAAGCCGCCAAGTACATTTCCTATGGCAATATTGGCATGGTGTTTGCGCCTTATGGTCCACATTGGCGCAACATTAGGAAATTT…	MFPLAFSLLFLLLGALFWLKNRHGRNPKEGNLPPLPPGPRGLPIIGSLHLLGGLPHRALEKLSKKYGPIMSMRLGSVPAIVVSSPQAAELFLKAHDIVFATRPNTQAAKYISYGNIGMVFAPYGPHWRNIRKFVVLELFTSTKINSFIGMRREEVGLLVKELKEAAAGGVVVDVSAKVGDLIENMIYRMLLGRSTKDDRFDLKGIMDETLTLAGTFNLADFVPFLAPLDLQGLTRRIKDTSKSLDRILETFIDEHEEKARNGNSTHNKDFVDEMLSLKNNNYTDTHNELSKVIDRPTIKAIMIDIIAAAIDTSFTSIEWILTELIRHPRVMKKCQDEIHAIVGVDRMVEETDLPKMNYLYMVIKEGLRLHPVTPLMGPRESMADIVINGYHIPKKSRVI…
AeCYP714C2	Arel.009111	ATGGAACAAGTTCTGTTTCCTTGTGCATCCACTATTTTGCTTCTCTTTGCCTTTGGCCTGCTTATACGCATCTTTAGTGATCATTTCCTGAAGGTTAAAATTCTTCGAGTAAAGCTCCAAAAGCAAGGAATTAGTGGCCCAAAGCCCACTAGTATAATTTTAGGAAACATTCCAGAAATAAAGAAGATCAAGCAAGAGATAGCAGGCAATAATTCGAACCCTGAGCCTGTAACACTTCTATGCTGCTCATTTTTCTGTTGGTTGATGTTAGTGATGTGCTCAGTACTAATTTATTCGCCAGGCAAAACTTTCACGTTTGCACTTGGGCGGGTACAGATTTTGTATGTCGCAGATCCTGAGTTGGTGAGAGAATTTAATCTATGCAAGTCACTGGACTTG…	MEQVLFPCASTILLLFAFGLLIRIFSDHFLKVKILRVKLQKQGISGPKPTSIILGNIPEIKKIKQEIAGNNSNPEPVTLLCCSFFCWLMLVMCSVLIYSPGKTFTFALGRVQILYVADPELVREFNLCKSLDLGKPAYLQKERGPLLGKGLITAYGEMWSHERKTITPTLYIDKVKNMMELMLESGNSLVKSWSSMVLSEGGTADIRVDEYVRKFSCHIFSSIMFGRNYPTETGLFQKCRALLKASASPTILDGRPFYRFLPNKKNREQWRLEKEIYSIIMDMAKKSNRVSGENLIQILMEGADKGNIGSSTPEQFVVDNCKDLYLAAFEVTGIAAIWGLMLLAAHPEWQARARAEILEVCGNKTPDAEMLGKMKVLKMVIQEALRLYPGVAFISREAL…
AeCYP76B1	Arel.007139	ATGGATATCTTAACCATGCTATTCTCTCTATTGTTTGCGTTTACCATTTTCAAGGCTCTCATTTCGCTAGCCAGATCAAGAACCAAAGCCAAGAAACTTCCACCGGGACCGGTTCCCTTACCGGTCATCGGCAACTTACACAAACTCGGCGACCACCCCCACAAGTCCCTGTCGGCCCTGGCCAAAATATACGGCCCAATCATGCATCTAAAATTGGGCCGCATAAGTACAGTAGTCATATCTTCATCAGACACAGCCAAACAAGTCCTCCAAAAGCAAGATCTGGCTTTCTCTACCCGATCCGTGCCCGACGCTATTCACGCCCACAACCACTTGGAATACTCCGTTGTTTGGTTACCAGTTGCCAGCCGGTGGAGAAGTCTGAGAAAAATAATGAAT…	MDILTMLFSLLFAFTIFKALISLARSRTKAKKLPPGPVPLPVIGNLHKLGDHPHKSLSALAKIYGPIMHLKLGRISTVVISSSDTAKQVLQKQDLAFSTRSVPDAIHAHNHLEYSVVWLPVASRWRSLRKIMNSNIFSGNKLDANQHLRSKKVHELIGYCRKCSQTGEAVDMGQAVFRTSLNLLSNTIFSKDLTDPYEDTGKEFKDLVWNIMVEAGKPNLVDFFPVLKKIDPQGIRRRMTLHFGKVLEMFSDLIIVRLELRKLGKSVGNGDVIDELLNISEEKSDEIDRTHIEHMFLDLFAAGTDTTSSSVEWAMAELLKNSEAMVKAKAELNQVIGKGKMVEEADVSRLPYLRSIVKETLRIHPPVPFLIPRKVEEETEVCGYTIPKGSQILVNAWAI…
AeCYP93A1	Arel.001712	CAGCTCAATACGATGCCAGAAGCAAGATATCGACTATCGAGGCCGGATGACGTTACGCAAATGTTCAGTCGTCGCCGGAGGTCGATCGGTAGTGTAGAAATTCTAGCTGATGAACAGGAGGTCAATACCGGAACTCCTATCCGGTGGGGTGCGACGGCGATGACGGGCGCACATGGAGCAACGGGAGTGGCAGCTACTCGAGGTCGTGGTTTTGGGAGGGGTAGTTTTGGGTCATCGAGAATTGGGATTGGGCGTGGACGAAGTTTGTACGGATCGCCTGGGCCGTCTGATCGTCAGAACACGCCAGTGGGAAGCGCCCGGCGAACAAGAGGAAGCCGTAGTTTGTTACCTTCTTGGTACCCAAGAAAGCCTCTCCAAGACATCACTACTATTGTGCAG…	QLNTMPEARYRLSRPDDVTQMFSRRRRSIGSVEILADEQEVNTGTPIRWGATAMTGAHGATGVAATRGRGFGRGSFGSSRIGIGRGRSLYGSPGPSDRQNTPVGSARRTRGSRSLLPSWYPRKPLQDITTIVQTIERRRACLREIEGQQLESPLPLRQSVHDPSVSVFGAPLEHDLSMISSSPTVRTRHCPPYVGKVTKILLDITDQNAGESDFLTPEKKLLNSIDTVEKVVMEELHRLKKTPTVKKVERGKKQEGMAIIDSYYSLFLIWFISTLLVYFLTTKLLKSNRKTIRHPPSPPALPVIGHIHLLSNILPNSLQTLASHYAPLMRISIGSSTSLIVSNAIIAGEVMKTHDLNFAYRPEFGASEYKLYKDSAFFGAEYGTYWRFLKKICMTELLS…
AeCYP736A6	Arel.031141	ATGTCTCCCCTCACCTTTCCTATTCTTTTTCTCCTTCTTCCACTCCTCTGGTGGTGGCTCATCCATCTCCGCCGCCGGACCACCGCACCATCACCAACCCACCACCAAAAACTCCCACCTGGCCCTCCCGGACTACCCATCATCGGTAACCTCCACATATTAGGAAACCTTCCCCACCGCACCCTTTATAAACTTTCCCGAAAATATGGTCCCATCATGTACCTCCGCCTAGGAAATGTCCCAACAATTGTAGTCTCGTCGCCCGAAGCCGCCGAGCTCTTCCTCAAGACTCATGACACTGTTTTCGCTAGCCGGCCTAAAATTCAAGCATCGGATTATTTTTACGGTCCAAAGGGCGTGGCCTTTAGTTATTATGGACCTTATTGGCGCAATGTTAGG…	MSPLTFPILFLLLPLLWWWLIHLRRRTTAPSPTHHQKLPPGPPGLPIIGNLHILGNLPHRTLYKLSRKYGPIMYLRLGNVPTIVVSSPEAAELFLKTHDTVFASRPKIQASDYFYGPKGVAFSYYGPYWRNVRKFCTLELLSTTKIDSLAGMRREELGRLVESLKEAAVAREVVDLSEVVGGLVEDMTFRMLFGRSKDERFDLKGNIQELTNVVGAFNVAEYVPFLGVFDLQGLTRRMKANYKALDKILEILIDEHEQYMVVMGTKKHDRDFVDELLSLTNKSTRTTHEELANTIDKTNIKAIILDMITGSIDTSHTGIEWILSELIRHPNVMKKLQEEIKTIVGDTEIVEEIDLPKLKYLDMVVKESLRLHPVAPLLVPHESMEDIVINGYYIPKKSR…
AeCYP736A7	Arel.031597	ATGCATCGATATCAGAATTTCGATTCCATGAAGTTGTCCCTCAACTTTTCATTGCTTAAGGGATTGACTCGACGTTTCAAGAGGACAAACAAGGCGTTTGACAAAATTTTCGAGATTATCATCGATGAGCATGAACATGATGCTATTACTAGGCATAAAAATCTTGATAGGGATTTTGTTGATGTTATTCTGTCTTTGAAAAACAAGTCCACAAGTACAAATGACCAACTATCCTACACAATCGATAGAACAAATATTAAAGCAATCATGTTAGATATGATGTTTGGAGCAATTGATACCTCACATACTTCAATCGAATGGATCATGTCAGAACTTATAAGGCATCCGAGGGTGATGAAACGACTTCAAGAAGAACTTACGACCGTTATGGGAGATAAT…	MHRYQNFDSMKLSLNFSLLKGLTRRFKRTNKAFDKIFEIIIDEHEHDAITRHKNLDRDFVDVILSLKNKSTSTNDQLSYTIDRTNIKAIMLDMMFGAIDTSHTSIEWIMSELIRHPRVMKRLQEELTTVMGDNEMVEESHLSKLEYLDMVVKESLRLHPVAPLLAPRESMEDIVINGYYIPKKSHIIVNYWGIGRDLNVWSEDVEEFLPERFNGSNIDLRGRDFQLIPFGSGRRGCPGMHLGLINIKLVVAQMVHCFDWELSMGKSPTELEMDEKFGLTLPRANHLLAIPIYRL
AeCYP71D5	Arel.015821	ATGGAGCTCAATTCTCTAATTTCAATCCTAATCTCTTTTCTTTTTATCTCCTTCTTGATCCTACTCAAAAGATCATTTAGAAAAACAAGTGTTCATCAAAATTTGCCTCCCGGCCCACGAAAGCTACCACTCATCGGAAACATACTAGAATTGGCAGGTGAAGTACAACATCGAGCTCTCCGAGATTTGGCCCAAAAACATGGACCAATCATGCATCTTCAACTCGCTGAAATATCCGCGATTGTAGTCTCATCATCACGAGTGGCAAAAGAGATATTCAAAACCCACGATCGTGCCTTTTCGGATAGGGCACAACTTCAGCTGAGCAAGATTATATTGAAAGGATGTAAAGATGTTGTTTTTAATGAGTACGATGATTATTGGAGGCAAATGCGTAAA…	MELNSLISILISFLFISFLILLKRSFRKTSVHQNLPPGPRKLPLIGNILELAGEVQHRALRDLAQKHGPIMHLQLAEISAIVVSSSRVAKEIFKTHDRAFSDRAQLQLSKIILKGCKDVVFNEYDDYWRQMRKVCTVELLTANKVNSFRSIREDEAWNLVESIKSSDSPTNLTYKFTSLTNAITCRAAIGEKSKYQDELVHLIDLMAALGGGFDIADLFPSYRFLHLFSGLRSKLEKVRKRLDQIFYNIIKEHEEKRVMTKNRDGRVEGEEDLVDVLLRVQEKGGLQFPITSDNIQGIICDMLTAGTDTASTALDWTMSELIRNPRVMEKVQDEVRQAFKGKTKIHEADVQGLSYMKLIIKETLRLHPPAPLLLPKECREQCEVEGYAIPVGTKLMVNA…
AeCYP78A2	Arel.028115	CACTTGCCACTTCATGGTTTAGGCCAAACGAGGAAATTTAAGAACTTCCCTTTAATTCATAGTATAACCTCTCACCTTAAAACCTCTAGATCTCTTTCCGCGCCCATGGAAACACACACTGAAAATTTATGGTTTCTACTCCTAGCTTCCAAATGCAAACCAGCTTTATCATCTGAAAATATCATTATTTACCTGTTGTTGTTCATTTGCTTTTCCTGGCTATCAATGTCTTTGATCTATTGGGCATACCCGGGCGGCCCAGCATGGGGAAAATACTACTTTTGGTGGAAGGGAATAACAAAAGCCCTGCCAAATCCAAAAATCCCCGGGCCACGGGGATTACCGCTTATCGGTAGCATGAACCTCATGGCTAACCTACCTCATCAACAGCTTGCGGCC…	HLPLHGLGQTRKFKNFPLIHSITSHLKTSRSLSAPMETHTENLWFLLLASKCKPALSSENIIIYLLLFICFSWLSMSLIYWAYPGGPAWGKYYFWWKGITKALPNPKIPGPRGLPLIGSMNLMANLPHQQLAAMAQSLRAKRLMAFSLGETRVIVTSHPDVAKEILNSPVFADRPVKESAYSLMFNRAIGFSPYGDYWRTLRRIAATHLFCPKQMNLSEVQRSTIANQMVQEISSSSSSSSSSSSSSNGECCNIRAILKRASLNNMMRLVFGREYEVQVCSINSEAGEISELVEEGYDLLGQLNWCDHLPCLSSFDPQNIRLRCSKLVPRVNQFVNRIISEHRDGASSVLGSERNHDFVDVLLSQHGPNKLSDPDMVAVLWEMIFRGTDTVAVLIEWIL…
AeCYP83B1	Arel.031014	ATGACTATATTTCTCCTTCTCCTCGTCCTTATACTTGTTCCTCTATGCCTACTACTTTTCCCACTAAAACCAAAAAAAATTGCCCGAAAACGCCGTCATCCACCAGGCCCTCAAGGGCTTCCCTTCTTAGGAAACTTGCACCAACTTGATAGCTCAACCCTTCATATCTATTTATGGAAACTTTCTCAAAGATATGGCTCCCTCATGTCCATGAAGCTTGGTTCTGTCCCAACTCTTGTAGTCTCTTCAGCAAGAATAGCAAAAGAAGTCTTTAAAACACATGATCTTGCATTTGCTAGTAGGCCATCTTTACATGGACAAAGGAAACTATCTTACAATGGATTAGATGTGTCCTTTTCTCCATATAGTGACTATTGGAGGGAGATGAGAAAAGTTTGT…	MTIFLLLLVLILVPLCLLLFPLKPKKIARKRRHPPGPQGLPFLGNLHQLDSSTLHIYLWKLSQRYGSLMSMKLGSVPTLVVSSARIAKEVFKTHDLAFASRPSLHGQRKLSYNGLDVSFSPYSDYWREMRKVCVLHLFSSKRSQSFRPIREDEVARLVKKICDLASSSKLVNLNEILMTLTTSIICRVAFGKRYDEEGSERSRFHDIFNETNAMLGSFFVSDYFPLMGWIDKLRGISGRLEKNFKDMDSFYQELIDEHLNSERTSSMKGDILDILLQLKRDKLFSLDLTFDHIKGVIMNIVIAGTDTSLAVVVWAMTRLMQNPTQMKQVQEEIRKTIGKKGHVDEDDLQKLVYLKAVVKETMRLFPPVPLLLPRETIDSCVIEGYEIQPKTLVYVNAWA…
AeCYP72A7	Arel.015194	ATGGGAAATAAACTTGTATCAGTGAAAATGACAATGATTTACAACTTAATTTCAGCCTCTCTTTTCATTGTGTTTGTAATATTTGCATGCAGAGTTTTGGACTGGATTTGGTTTAGACCAAAGAAGCTAGAAAGGATATTGACACAGCAAGGTTTCAAAGGTAACTCCTATAGCCTGCTGGTCGGAGACCTTCAAGACGGCTCAGCCCTCATCAAAAAAGCCTATTCAAAGCCCATCAAAGTGACTGATGATATTCTGCCTCGTAAAAAATCCTTTACATGGGTTGGACAGATACCAAGAGTACACATCACAGACCCCCAGCTAGCCAAGGAAGTGGTGTTGAAGTACAATAACTTTCAGAAAAATTTCAAGACAAATAATCCACTAATCAAGTTTTTA…	MGNKLVSVKMTMIYNLISASLFIVFVIFACRVLDWIWFRPKKLERILTQQGFKGNSYSLLVGDLQDGSALIKKAYSKPIKVTDDILPRKKSFTWVGQIPRVHITDPQLAKEVVLKYNNFQKNFKTNNPLIKFLLSGLATYEVSEWEKIVSAEGWGEVDIWPHLETLTSDAISRTTFGHSYIKGRKISKLLKEQSELVFEAMQSVYIPGWRFLPTKRNKRMKQIDREVQVLIMDMINERVKAMKGANPNDMLGMLLKSNFEQNQHGINRGMSMQDIITECKLFYFAGQETTSTLLVWTMILLSQHPIWQTRAREEVLKVFGNEKPNNDGISRLKIVTMILNEVLRLYPAAVELTRIVPKETKLGELTIPSGVQLMVLTILLHHDREIWGDDVKEFNPERF…
AeCYP714C3	Arel.016931	ATGTTGAATATGCTGATGACGATTTGTTTGGTTGGGTTATTGGGATTGTTCATAAGGTTGTATAGAGCGATAATTTGGGAGCCAAAAAGGTTAAGATCTTTGATGAAGCAGCAAGGGATTGATGGACCTCCCCCAAAGTTTCTTCTAGGAAATCTTTTAGAGATCAAGAAGTCCAAGGCTGCAAGAAAAGCTCCAACACATGAAAGTAGTAATGTCCTCTCCCATAATTGTTCAGCTTTCCTCTTTCCCATCTTCGAAGAATGGAGAAAGCAATATGGTTCAATATATGTGCTTTCTCTTGGAACTGTAAATGTAGTTTATGTCCACAAACCTGATGTGGTTAAAGAAATAACTACACACACATCCTTGAACTTAGGAAAACCTTCATATCAACAAAGA…	MLNMLMTICLVGLLGLFIRLYRAIIWEPKRLRSLMKQQGIDGPPPKFLLGNLLEIKKSKAARKAPTHESSNVLSHNCSAFLFPIFEEWRKQYGSIYVLSLGTVNVVYVHKPDVVKEITTHTSLNLGKPSYQQREHGPLLGQGILTSNGATWSHQRKILAPELYVEKVKGMLNIVIESTLTLVNSWNSRVDVEGGVVDINIDDYMRNFSGDVISRACFGGNYAKGEEIFLKLRALQEITTKKGLALGIPGMRYLPTKNNRKSWALQNEVHRLILKVVKERKEAGYEKDLLQIVLESAEKSDLSQEEMDRFIVDNCKNIYLAGYETTAVSSTWTLMLLASNPEWQTRVRDEVLDICKGQIPSNDMLLKMKQLTMVIHESLRLYSPVPVISREALTDMKFGD…
AeCYP81Q3	Arel.004775	ATGATACTTGCTGGAACGGATACATCAGCAGTGACTATCGAATGGGCAATGTCCCTTTTGCTTAATCATCCAGAAGTGTTGAAAAATGCTAGAGCTGAAATTGACACTCATATCGGCCAAGACCGATTGATTGAGGAATCAGATTTATCCAAATTACATTATCTACAAAACATTATTTCCGAGACTTTTCGACTCTGCCCAGCAGCACCATTACTAGTACCACACGAGTCGTCGGCTGACTGTACCGTTGGAGGGTATAACGTGCCGCGTGGCACACTTTTATTGGTTAATGCATGGGGCATTCACAGGGATCCCAATGTGTGGGACGAGCCCACAATGTTTAAGCCGGAAAGGTTTGAAGGTGCCGAGGCCGAGACGCACAAGTTGATGCCGTTTGGG…	MILAGTDTSAVTIEWAMSLLLNHPEVLKNARAEIDTHIGQDRLIEESDLSKLHYLQNIISETFRLCPAAPLLVPHESSADCTVGGYNVPRGTLLLVNAWGIHRDPNVWDEPTMFKPERFEGAEAETHKLMPFGMGRRSCPGSGLAQRIVGWALGSLIQCFEWERISEKEIDLTEATGLTMPKAEPLEAMCKTRHIMDKVVL
AeCYP87A1	Arel.021446	ATGTGGTTTACTGTAAGCCTTATAGCTCTACTAGTTATCTGGATTATCCATTTATTGTTTACTTGGGGTAACCTCAAGCGCAATGGAAGATTGCCACCGGGTACAACGGGCTACCCGTTTATTGGGGAGACGATCCAGTTTTTCGCCCCGTACACGTTGTACGATATCCCACCATTCGTTAAAAAGAAAGTAGAAAGATATGGGACATTGTTTCGAACAAATATAGTTGGAAAGTCGGTAGTAATTTCAACTGATCCTGATATTAACTATTACATTTTCCAACAAGAAGACAAATATTTCCAGTGCTCGTATACAGAGAGTTTTTCCAAGATTCTTGGAGAGCAAAGTTTGCTTGCATATCATGGTGTTATTCACAAGTACCTTAAAAACTTGATTTTA…	MWFTVSLIALLVIWIIHLLFTWGNLKRNGRLPPGTTGYPFIGETIQFFAPYTLYDIPPFVKKKVERYGTLFRTNIVGKSVVISTDPDINYYIFQQEDKYFQCSYTESFSKILGEQSLLAYHGVIHKYLKNLILNLVGPEKLRQKLLPEMDTTTSRCLHSWSIRGDVDVKEGTEEMVFDYFAKQLFSYDDTKALKELRDNYKDFVDGLISFPLNIPGTAYHASLKGCKNAKRAINDIFEERKLSKMVHNDFLDLLIEEVKKEGKFLNQEIAVDIMFVLLFATYETTSAAITLAMKFLTDHPLALAQLTKEHEEILRTRENCEETTISWKEYKSMTFTHMIINETVRLANIAPWIFRKVIKDVELKGYTIPAGWTIMVSTSALHVNPAKYDNPLEFNPWRW…
AeCYP81D1	Arel.002495	ATGCAGGTTTTACTACATGCAGGAACTGATACGTCAGTTGGGACAATGGAGTGGGCAATGTCCCGTCTCCTCAACAATCCAGAAATTCTAAAAAAGGCACAAACTGAAATAGACAATCGTGTTGGACAAGACCAGCTGATCAACGAATCGGATTTAGGTGAGCTCTCGCACCTTCGTTGCATCATCAACGAAACTCTACGTATTCACCCAGTGACCCCACTATTAATACCTCATGAATCATCAGAGGAATGCAGGGTAGGAGGTTATCGAATCCCTAGCGGGACTATGTTATGTGTTAACTTATGGGGCATACAAAATGACCCAAAGGTATGGGAAGACCCCGGAAAATTCAAGCCCGAGAGGTTTGAAGGAATTGAAGGGACTCGAGACGGGTTCAAA…	MQVLLHAGTDTSVGTMEWAMSRLLNNPEILKKAQTEIDNRVGQDQLINESDLGELSHLRCIINETLRIHPVTPLLIPHESSEECRVGGYRIPSGTMLCVNLWGIQNDPKVWEDPGKFKPERFEGIEGTRDGFKLMPFGSGRRGCPGESLAMRMVGLVLGSLIQCFDWERVGKDMEDMTEGTGVTVSKAKPLLAKLQKGQKSPNQYSSKKRDERKQGEEDQGTNEGHCSAISSSRKPLLCIEEAIALQSVRRTNLSLIEGIKSKEAFKKKKRNLSAFHRMTGRVDIHLHHGGTWVKDPVWRYVGGDVYICKKFDADYLSIMCIKNTYKEELKYANVDQVYYLEPGLSIEEGLFVLEDDHGIRRILGKINSDTDVLEFFAKHDIDEPILNDKSPPVVPPEP…
AeCYP71D6	Arel.032721	ATGTGTATAAAAGAGAGTAGTACACTTAGCGAGCAACATCAAGAAGTCCAGTGCAGACAAAAAAGATTATTGAAACATCCAATGGAGCTCCAATTTCCCCCCTTCTCTGTTATCATTTCCCTAATAATTTTCTCTCTATTTCTCTTCAAGCTCTTCAAAAGATCCACACCCAATAACCTTCCCCCGGGTCCGACCAAGTTACCGATCATCGGAAATCTGCACCAACTGGCACGTGTCGACCCGATACCGCGTCGCGGCCTCCTAGAATTGGCTCAGAAATACGGACCATTGATGCACTTACAACTTGGCAAAATCTCGGCAATTGTGGCGTCGACGCCACGGGCGGCGAAAGAGGTACTGAAAACGCATGACCTTTCTTGTGCGGATAGGCCGGATATG…	MCIKESSTLSEQHQEVQCRQKRLLKHPMELQFPPFSVIISLIIFSLFLFKLFKRSTPNNLPPGPTKLPIIGNLHQLARVDPIPRRGLLELAQKYGPLMHLQLGKISAIVASTPRAAKEVLKTHDLSCADRPDMLLGRIMLKNSRDIVLAPYGDYWRQMRKISTSELLSANKVRSFRNIREEESWQLVESVRSSVGSPVNFSTQVTGMANAVICRAAIGKKCAYQDELIEVVEDIGYWGSGFFMADLFPSLKFLEYVTGMRPKLQKMRRKLDHIFENIIQEHKEKVASKKVNDNEEDLIDVLLRIKESQSLEIPITSKDIQGITLDMFTAGTDSTSATLQWMMSELMRNPQVMKKAQAEVREALKGKTIIYEADIQGLTYLKLVIKETLRLHAPVPLLVP…
AeCYP72A13	Arel.015871	ATGGGAGTACTACTAGTAGCTTCAGTTGTAATCTCAGTTGTTTTGGTTACAATTGTGAGCTTGACAAACAAATTAGTGAATAGGCTATGGGTAAGGCCAAAAAAGATAGAGAAGTACCTGAGAGAGCTAGGGTTTAGTGGCAATCCGTACAAGTTTTTGCACGGCGATATGAAAGAGTTCTCAAGGATATCAGAGGCAGCAATGTCGAAACCCATGGACTTCTCCCATGATGTTGGAGCCCGGGTTCTACCATATCACCATCATTTAGTCAAGAAATATGGTAACAACTCATTTATGTGGTTTGGAGCGAAACCAAGGTTAAATATCATGGATCCAGTGCTAGTCAAGGAGATTTTGTCTAAGCCTGATGAATTTCATAAAGTATACCCAGATCCAGTT…	MGVLLVASVVISVVLVTIVSLTNKLVNRLWVRPKKIEKYLRELGFSGNPYKFLHGDMKEFSRISEAAMSKPMDFSHDVGARVLPYHHHLVKKYGNNSFMWFGAKPRLNIMDPVLVKEILSKPDEFHKVYPDPVADLVVGGLSTAHGEKWPRHRKIINQAFNLEKLKGTLPEIYLSTTNMISTWKTLVSTTGTTEVDAWPYIENLARDMISRAAFGSNFEEGRRIFQLHEKQADLAFQFMGTSYIPWARQFKIKANRKMKRLNGEMIDQLSGIIKKREKALKVGQKINKNDLLSVLMEATRKETQEEGTGMTMEEVIDECKVFYSAGADSTARLRVWTMILLSKHTDWQARAREEVLQLLGSKKEFDFELLNHLKIVTMILYEVLRLYPPAGMLLRATSK…
AeCYP714C4	Arel.016922	ATGTTGAATATGCTGATGACGATTGGTTTGGTTGGGTTACTGGGATTGTTCATAAGGTTGTATAGAGCAATAATTTGGGAGCCAAAAAGGTTAAGATCTTTGATGAAGCAGCAAGGGATTGATGGACCTCCCCCAAAGTTTCTTCTAGGAAATCTTTTGGAGATCAAGAAGTCCAAGGCTGCAAGAAAAGCTCCAACTCGTGGAAGTAGTAGTGTCCTCTCCCATAATTGTTCAGCTTTCCTCTTTCCCATTTTCGAAGAATGGAGAAAGCAATATGGTTCAATATATGTACTTTCTCTTGGAACTGTAAATGTAGTTTATGTCCACAAACCTGATGTGGTTAAAGAAATAACTACACACACATCCTTGGACTTAGGAAAACCTTCATATCAACAAAGA…	MLNMLMTIGLVGLLGLFIRLYRAIIWEPKRLRSLMKQQGIDGPPPKFLLGNLLEIKKSKAARKAPTRGSSSVLSHNCSAFLFPIFEEWRKQYGSIYVLSLGTVNVVYVHKPDVVKEITTHTSLDLGKPSYQQREHGPLLGQGILTSNGAAWSHQRKILAPELYMEKVKGMLNIVIESALTLVNSWNSRVDVEGGVVDINIDEYMRNFSGDVISRACFGGNYAKGEEIFLKLRALQEITTKKGLALGIPGMRYLPTKNNRESWALQNEVHRLILKVVKERKEAGYEKDLLQIVLESAEKSDLSQEEMDRFIVDNCKNIYLAGYETTAVSSTWTLMLLASNPEWQTRVRDEVLDICKGQIPSNDMLLKMKQLTMVIHESLRLYSPVPVISREALTDMKFGS…
AeCYP76A2	Arel.023718	ATGGAGTGGTTCTGGAGCTCTACTCTTTGCTCGATTTTGATTATTTTGCCGGTCTTCTTCTGGCGTTGGACGAGGAATTCCGGGTCCAAGCTACCTCCGGGGCCGAGAGGTTGGCCAATAGTTGGTAACATTTTGGACGTTGGAACGTTACCGCATAGAAGCCTAGCAGTACTAAAACAAAAATACGGCCCAATTGTGTGGCTAAATCTTGGCTCCATAAACACCATGGTGGTTGTCTCAGCCACTGCCGCGGAAGAGTTGTTCAAGAACCATGATCTGTCGTTCATCGAAAGGGCCGTGGTTGAAACAACGAGGTCACATGACTACTACAAGAGCTCAATGGGTGTAGGTTCATTTGGGCCGTATGTTCGCGCTTTGAGGCGGATATGCACGGTTGAA…	MEWFWSSTLCSILIILPVFFWRWTRNSGSKLPPGPRGWPIVGNILDVGTLPHRSLAVLKQKYGPIVWLNLGSINTMVVVSATAAEELFKNHDLSFIERAVVETTRSHDYYKSSMGVGSFGPYVRALRRICTVEMFSNKKISETVCIRQKCLTDTCSWIEKQVDCSEGGIEVKKFVFSAVFNMIGNMILSRDLVDPNSEMVLEFSAAITGIMECVGCPNVSDLFPWLRWFDLQGLRRRMDRVLAKLVEITSGMVKERLKEGGPQRKDFLDMLLDFEVINEKDEPAKLSEFQISIFLAEMFIGGTETISTTIEWAMAELFRNPEAMIKIKAELARLVGTNKKFEDRDIDNLHYLQATVEETLRLHPPTPLLLSRKALRNTNFMGYNIPKNTRVFVNAWAIG…
AeCYP72A14	Arel.002151	ATGCATTTTGGAGTTGCCAATGCATGTGAGCCAGTATCAATAGAATTAAAATATGAGTACTGTAACATTAATACTCTCCGTTGCAGTCTCAATTGTTTTGTAAAATGGGCACATGAAATAGTGAAAAAGTTGTGGGTGAGGCCAAAGAAGCTGGAGAAACGTCTAAGAGAACTAGGGTTTAATGGTAATTCATATAAATTTGTTTATGGAGACATGAAAGAGTTTGGGCTCATGAGAAGTGAAGCAAAATCCAAACCCATCAAACTCTCAGACGATATTCGATCGCGTGTTTTACCATTTCACTACTATATCATCAACAAGTTCGGTAATAATTCGTTTATCTGGTTTGGGGCGAAACCGAGGTTAAATATTATGGACCCGGTGTTAGTGAAAGAGATA…	MHFGVANACEPVSIELKYEYCNINTLRCSLNCFVKWAHEIVKKLWVRPKKLEKRLRELGFNGNSYKFVYGDMKEFGLMRSEAKSKPIKLSDDIRSRVLPFHYYIINKFGNNSFIWFGAKPRLNIMDPVLVKEIYSRPNDFHKPHPDPVADLVVGGLLAAHGQKWTKHRKIINPAFHVEKLKCMLPAISLSCDDMINKWEILVSTNGSAEVDVWPYLQDLSGDMISRAAFGSNLEEGRIIFQLHKEQTDLGFKMMGSSYTSAFRPWFFPPPKPDKRMIQIEGEIQAQIKKIINKRENATKVGEGNIDDLLSILMESNTKEIQEDDERMRMSMEEVIDECKMFYTAGANSTSRLLVWTMIMLSAHPNWQSRAREEVLQVFGNKKLYFDGLNHLKIVTMILQ…
AeCYP736A10	Arel.031153	ATGTCTCCCTTCACCATTACCATTCTCTTCCTTCTCCTTGCAACCCTATGGTGGTTCATCCTTAGCTGGATGACGCAAAACCGCAACCGCAACCGCAAACTACCGCCAGGTCCTCTAGCCTTACCAATCATCGGTAACCTCCACATGTTAGGAGCCCTCCCCCACCGCGCCCTCCACACCTTGGCCAAAAAATACGGTCCCATAATGTCCATCCGCCTAGGAAATGTCCCAGTAATCGTAGTCTCGTCTGCCCAAACCGCCAAGATCTTCCTCAAAACACACGATACTACTTTCGCTAGCCGGCCTAAAATTCAAGCCTCCGAATTATTGTCTTATGGAACAAAAGGCATGGTTTTCACCGAATACGGTCCGTATTGGCGAAATATTAGGAAATTTTGT…	MSPFTITILFLLLATLWWFILSWMTQNRNRNRKLPPGPLALPIIGNLHMLGALPHRALHTLAKKYGPIMSIRLGNVPVIVVSSAQTAKIFLKTHDTTFASRPKIQASELLSYGTKGMVFTEYGPYWRNIRKFCTLELLSATKIDSFAGMRREVMVLFVENIKEAVAAGQVVDVSEKVGGLIEDMMVRMLFGRSIRGDRFDLTCNIQEITDTAGAFNIADFLPILAPLDLQGLTRRFKALHKDLDKTLEMIVNEHEEAATSGSKKLDLDFVDVLLSLLDKSSENTYAELSHMLDRRTLKGIIVDMIAAGIDTSHTAIEWIMTELIRHPRIMKQLQEEIKSVVGVNEIIEETDLTKFTYLDMVIKETFRLHPVVPLLVPRESMEDIVINGYYIPKKSRVLI…
AeCYP81D2	Arel.013313	ATGTACCTGCAGACACTTTTACAGGCCGGAGTCAGTACTTCAGTTGATACATTGGAGTGGGCTATGTCACTTTTACTTAACAACCCACAAGTGTTACACAAGGCCCAAATCGAAATTGACAACCTTGTGGGCCAAGATCGTCTAATCAACGAATCCGACGTGGCCGAGCTTCCTTATTTGCGTTGCATCATCAACGAGACGCTACGAATGTACCCGGTAGCGCCATTCCTCATACCCCACGAGTCATCCCAAAAATGCACAGTAGGCGGCTTTAACGTTCCCCGTGGAACTATGCTTCTAGTGAACTTAAAGGCCATACAAAATGACCCAAATATTTGGATAGACCCGGAAATATTTAGGCCCGAGAGATTTGAAGGGGGCCGGGTCGGGTTTACTTGG…	MYLQTLLQAGVSTSVDTLEWAMSLLLNNPQVLHKAQIEIDNLVGQDRLINESDVAELPYLRCIINETLRMYPVAPFLIPHESSQKCTVGGFNVPRGTMLLVNLKAIQNDPNIWIDPEIFRPERFEGGRVGFTWMPFGSGRRSCPGEGLAMRVDVLALGALIQCFDWDRVGKEMVDMTEGGGLFAPKVVPLRAKCQARPNMVKLLSQI
AeCYP716B1	Arel.032198	ATGCGGTTCAACAAGGGCTATGTAAAATCAATGGCAGATGCTGTTGGGAAGAATAGCTTGCTATGTGTTCCCCAAGAGAGTCACAAAAGGATTAGGCGTCTTCTATCTGATCCGTTCTCTATGAATTCTATGGCGAAGTTTGTTCAAAAGTTTGACAACATGCTCTGCGAAAGACTGACAAAATTAGAAAAAGAGGGGAAAACCTTTGTTGTGCTTGACTTCAATATGAAGATAGCATTTGATGCAATGTGCGACATGCTGATGAGCATCACGAATATTTCCTTGCTAAAACAAATTGAGGAAGACTGCACTGCTGTTTCTGGTGCCATGCTTTCAGTTCCGGTCATGATTCCTGGCACCAGCTACTACAAAGGCATCAAGGCACGTAATAGGCTCATG…	MRFNKGYVKSMADAVGKNSLLCVPQESHKRIRRLLSDPFSMNSMAKFVQKFDNMLCERLTKLEKEGKTFVVLDFNMKIAFDAMCDMLMSITNISLLKQIEEDCTAVSGAMLSVPVMIPGTSYYKGIKARNRLMEMFGTMIARRRSGKESPEDFLQSMLRRDTYPADEKLQDSEILDNLLTLIIAGQTTTAAAMMWSVKFLDENKDIQERLREEQLSILRKKPNGAVVTHEDLSKMSYGSKVVKETLRMSNVLLWFPRVALEDCVIEGFDIKKGWHANIDATCIHYDPEIYKDPLQFNPSRFDEMQKPYTYIPFGSGPRTCLGINMARVTIWTVDDPDQGLERKSHIPRLRSGCPITLSALTRANIVKKVEGAS
AeCYP78A3	Arel.016135	ATGAGAACAGACACAGAAAACCTATGGATTTTTGCTTTTGCTTCTCAATGCAAATCTTACACTTCAATAAATTTCATATATTTCTTCTTAATTTCTGGTCTAGTTTGGTTTGCCATGAACTTAATTTACTGGGCTCACCCGGGTGGTCCAGCCTGGGGCAAGAATAAATGGAGAAAAAGTTCATCATCTTCCATCGCTAATAATAATCCCATACCAGGTCCAAAAGGTCTTCCAATTATTGGGAGCATGTCTCTTATGGCTGGTCTAGCGCACCACAAGATTGCAGCCATGGCCAAATCTTGTGGAGCCAACCGGCTAATGGCTTTTAGCCTGGGGGAAACAAGGGTCATCATTACATGTAACCCAGATGTAGCCAAAGAGATTTTGAACAGCTCCGTG…	MRTDTENLWIFAFASQCKSYTSINFIYFFLISGLVWFAMNLIYWAHPGGPAWGKNKWRKSSSSSIANNNPIPGPKGLPIIGSMSLMAGLAHHKIAAMAKSCGANRLMAFSLGETRVIITCNPDVAKEILNSSVFADRPVKESAYSLMFNRAIGFAPYGVYWRTLRRIAATHLFCPKQIKAFESQRFEIAHQMVAMFSHDNDKGTTINVREALKRASLSNMMCSVFGRKYGLDSCNSETEELRKLVDEGYDLLGTLNLSDHLPWLFDFDPQKIRLRCSNLVPKVNLLVCQIISEHRAKTGKLNGDFVDVLLSLQGGEQLSDSDMIAVLWEMIFRGTDTVAVLIEWVLARMVLHPDVQSRVHDELDRIVGRSRAVTEADITAMVYLPAVMKEVLRLHLPGP…
AeCYP736A11	Arel.022071	ATGAGAAAGGAGGAGCTTGGGTTATTGGTGAAGGAGCTTAAGGATGCCGCCGCTAAATGTGAGGTGGTGGATATTAGTGCAAAGGTGGCTGATCTTATTGGAAAGTTCAATCTTGCAGATTTCGTGCCTTTCCTAGCCCCACTTGACCTTCAGGGATTGACTCGAAACTTTAAGGAAGCCGGCGAGAAACTTGACAAAATGTTGGAGCTAATTATTGATGAGCATGAACAAAACGCAAGTAATGGACTTCAAAAGAAAAATACCGACTTTGTTGATGAAATGCTATCATTGATGAAAAATTCCACAAGCACCCATCACGAGTTAGCTAAAGCGATTGACAGGTCGAGTATTAAATCTATCATGGTAGACATTATCACAGCAGCGATCGATACTTCATAT…	MRKEELGLLVKELKDAAAKCEVVDISAKVADLIGKFNLADFVPFLAPLDLQGLTRNFKEAGEKLDKMLELIIDEHEQNASNGLQKKNTDFVDEMLSLMKNSTSTHHELAKAIDRSSIKSIMVDIITAAIDTSYTSIEWILAELIRHPRVMKKCQEEVNTIVGLDRMVEETDLPKLEYLYMVVKEGLRLHPIAPLLGPHESREDIVIDGYYIPKKSRVIVNAWALGRDPNVWSEDVEEFLPERFTRSKIDLRGRDFQLLPFGSGRRGCPGMQLGLINIQFVLAQLLHCFDWELPSGISTGDLDMTEKSGLTIPRIQHLLLVPKVRI
AeCYP87A2	Arel.020115	ATGTGGTCAGTTTCTTGGTGCACTGTAGTTTTAGTAGCTTTATGCATTATGCATTGGGTTTACAGATGGAGAAATCCTAGATGCAATGGAAAACTTCCCCCCGGATCAATGGGCTTGCCACTTCTGGGCGAAACTCTTCAGTTCTTTGCCCCCAACTCATCATCTGACATTCCTCCCTTCGTCAAAGAGAGAATGAAAAGATATGGGCCAATTTTTCGAACCAATTTAGTAGGACGACCAGTTATAGTATCAACAGACTCAGATCTTAATCATTTTATTTTCCAACAAGAAGGTCAACTGTTTCAGAGCTGGTACCCTGATACGTTCACAGAGATATTTGGGAAACAGAATGTAGGTTCCTTGCACGGGTTCATGTACAAGTATCTCAAGGGCATGGTA…	MWSVSWCTVVLVALCIMHWVYRWRNPRCNGKLPPGSMGLPLLGETLQFFAPNSSSDIPPFVKERMKRYGPIFRTNLVGRPVIVSTDSDLNHFIFQQEGQLFQSWYPDTFTEIFGKQNVGSLHGFMYKYLKGMVLNLFGPESLKKMLPEVEQAANTNLKMWSGQDTVELKDASAAMIFDLTAKKLISYDPKKSTENLRENFVAFIKGLISFPMDIPGTAYHKCLQGRKKAMRMLKSMLEERRARPNKIQRDFYDYVVEELQRKDTVLTEAIALDLMFVLLFASFETTSLAITFAIKILADHPHVLKELTEEHNAILRKREDLENGLTWKEYKSMRFTFQFINETVRLANIVPGIFRKALKDIKFKGHTIPAGWAVMVCPPAVHLNPSTYEDPLNFNPRRW…
AeCYP72A15	Arel.028619	AAACTTCATATATATATAAAAACAAAGTTCAAGTTTGAATTCCATCAATTATACCTACAAATCACAAAAGTAATCTCTTCAATTTTTAAGCTAATGGAGCAAACTATGCTTCTTTCTCTATTAATCTCTTCATTGTTCCTGGTACTCTATTGTGTTTTAAGAGCATTTTACTCCATTTGGTGGAAACCAAAAAGGCTCGAGAAGTACTTAAAGCTGCAAGGAATCAATGGCACTCCCTATAAGCTATTGTTTGGAGACATGAAAGCGTTTGTGAAGCTAATAACTGAAGCATGGTCTAAACCAGCTAGTCTAAGTCACCAGATTGTGTCTCGCGTAGATCCATTCACCCATAATCTTGTGCAAAAATACGGGAAGATATCACTGTTTTGGTTAGGGACG…	KLHIYIKTKFKFEFHQLYLQITKVISSIFKLMEQTMLLSLLISSLFLVLYCVLRAFYSIWWKPKRLEKYLKLQGINGTPYKLLFGDMKAFVKLITEAWSKPASLSHQIVSRVDPFTHNLVQKYGKISLFWLGTTPRLNIMDPQLMKEVLSNKLGHFQKPSLNPLILILTNGLTTLEGEKWVTHRRIINPAFHLDKLKGMLPVFSDSCLMLVERWKKSIGVQGTCEMDVWPEFQDLTGDIISRTAFGSNYEEGKKILELQKELQVLVMEAMQTLYIPGFRFIPTKKNKKRQSLNKRITSMLRTLVERKDRAMRAGESRSDDLLGLLLQSNKQNNLQHNAGVTDSNRMTIEEIIEECKLFYLAGHETTSSWLTWTIIVLAMHPDWQEKAREEVLQVCGKYN…
AeCYP72A8	Arel.002149	ATGAATATCTTAGCTGAGGTTACTGTTGTGATATGTCCTGTAGTCTCAATTGTTTTGGTAAGTATAGTAAAATGGGCACTTGAAATAGTGAAAAAGTTGTGGGTGAGGCCCAAGAAGCTGGAGAAATGGCTGAGAGAGTTAGGGTTCAAGGGCAATTCATATAGGTTTGTTTATGGGGACATGAAAGAGTTTGGGGGGATGAGAAGTGAAGCAAAATCCAAACTCATCAAGCTCTCAGACGATATTCGATCGCGTGTTTTACCATTTCACCACCATATCATCAACAAGTACGGTAATAATTCGTTTATCTGGTTTGGGGCGAAACCGAGGTTAAATATTATGGACCCGGTGTTAGTGAAGGAGATATATTCAAGGCCCAATGATTTTCACAAACCATAT…	MNILAEVTVVICPVVSIVLVSIVKWALEIVKKLWVRPKKLEKWLRELGFKGNSYRFVYGDMKEFGGMRSEAKSKLIKLSDDIRSRVLPFHHHIINKYGNNSFIWFGAKPRLNIMDPVLVKEIYSRPNDFHKPYPDPIADLVVGGLLAAHVHVTSNKLELR
AeCYP71D7	Arel.033433	ATGGAGTTCCAATATTCCCTCTTCTCTATCATCATTACTTCCCTAGCCAGCATCCTCTTTTTCTTTGTTTTGATCAATAAGTTATTGAAAAGATCCTCAAAAGTAGCTCATAAACTTCCCCCAGGGCCATGGAAGCTACCTCTGATCGGAAATTTGATTCAAGTGGCTGCTTCAAATCCGATACCACATCGCGGTCTGCTTGAATTGTCAAGGAAACATGGACCTCTCATGCATCTACAACTTGGTAAAATTCCTGCTATTGTTGTCTCATCGCCTCGAGTCGCCAAAGAGGTATTGAGAACCCATGATCTTGCCTGCGCGGACAGGCCGGATATGCTCCTGGGCAAGATAATGTTGGCCAACAGTAGAGACATTGTTTTGGCTCCCTATGGCGATTAC…	MEFQYSLFSIIITSLASILFFFVLINKLLKRSSKVAHKLPPGPWKLPLIGNLIQVAASNPIPHRGLLELSRKHGPLMHLQLGKIPAIVVSSPRVAKEVLRTHDLACADRPDMLLGKIMLANSRDIVLAPYGDYWRQMRKISTSELLSANKVRSFRNVREEESWQLIDSIRSSLGSPINYSTKVTGMANAIICRATIGKKCKYQDELIEVVEDIAYWGSGFFMADLFPKLKFLEYITGMRPKLEDMRRKLDHIFGHIINEHREKLASRNEQNIHDTDEDLIDVLLRINESQRLEFPITSNDIQGITLDMFTAGTDSTSATLQWIMSELMRNPRVMEKAQAEVRQALKGKTIIYEADIQGLSYLKLVVKETLRLHAPVPLLVPRECRKQCEIDGYTIPVGT…
AeCYP36A1	Arel.003894	ATGGCTTGGATCTGGATAACCCTTGCAGTAACTGTAATTGCTTACCTTCTCCAAGCATGGCTGAAGAAGAAGAAGAAGCAAGGAAAATTACCACCAGGTCCAAAAGGCCTACCCATTTTGGGACACCTTCATATGTTAGGCAAAAACCCTCACCAAGATTTACAAACACTAGCCGAAAAACATGGCCCTATTATGTACATGCGCTTTGGATTTGTTCCAAACATCATCGTCTCATCCCCACACGCAGCTGAGCAGTTTCTTAAGACCTATGATCTTAATTTCGCTAGTAGGCCGCCTCATGAGGCTGCTAAATACATCTCTTATGATCAAAGAAACTTGTCATTCGGAGCATATGGCCCTTATTGGCGCAACATGCGTAAATTATGCACCTTAGAGTTG…	MAWIWITLAVTVIAYLLQAWLKKKKKQGKLPPGPKGLPILGHLHMLGKNPHQDLQTLAEKHGPIMYMRFGFVPNIIVSSPHAAEQFLKTYDLNFASRPPHEAAKYISYDQRNLSFGAYGPYWRNMRKLCTLELLSSLKISSFQAMRKEELGLLVDFIENAARERVAVDLSGKVSSMSADMSCRMVFGKKYEDKEIDERGFKAVIQEGMQLAAIPNLGDFFPYLGVLDLQGLTKRMKAIAKVFDGFFEKILHEHEQPKDCRQNKDFVDTMLGIMESGEAEFEFDRTHIKATLLMLAAAMDTSATAIEWTMSELLRHPQVMKKVQKELEQVVGMDRMVEESDLESLKYLDMVIKEAFRLHPVAPLLLPHESIQDCTIDGFFIPKKSRVMVNVWAIGRDPKV…
AeCYP72A9	Arel.012517	ATGGAGTTAGTTTTGAAGTTAATTTCAAGTTTTTTTGCAATTGTTGTGGTGATATTGGGATGGAGAATTTTCAATTGGGTTTGGTTGAGACCAAAAAAGCTTGAAAAGTACTTGAGAAATCAGGGTTTTAATGGAAATTCTTACAAATTATTTTTTGGAGACCTGAAAGATATGGTTGTGATGATAAAAGAAGCCAAATCCAAACCTATCAATCTTTCTGATGATATTGTCCCCCGCATCATGCCCCTCAACCATAAAACCATCCAAACCTATGGAAAGAACTCATTTTTATGGCTTGGACCAAAACCAATGGTCCACATATTGGACCCTGATCATATCAAAGAGATCTTGACTAAGTTTTATCAGTTCCAAAAGCCCAGGGGAGGTAATCCTTTAACA…	MELVLKLISSFFAIVVVILGWRIFNWVWLRPKKLEKYLRNQGFNGNSYKLFFGDLKDMVVMIKEAKSKPINLSDDIVPRIMPLNHKTIQTYGKNSFLWLGPKPMVHILDPDHIKEILTKFYQFQKPRGGNPLTKLLATGLVDAEGDRWAKHRKLINPAFHLEKLKNMLPAIYLSSSEIMTKWEEMVSTKGQFELDVLPYLETFTSDVISRTAFGSSYEEGRKIFQLQREQAELIIQASQTIYLPGMRFLPTKRNKRMKEIAKEVKLALKSIINKRLQAMEAGECSHDDLLGDNLKSACVDDDFIKSTSRLAKAC
AeCYP82C1	Arel.012992	ATGGATTCTTCTCTCAACATTCCAACAGTTTGTCTCCTCATTTCTTTCATCTTTCTCTACTATATATTCATTCGAAAAACAAAAAACACAAAAACCAGCAAAAGTACCAAAGAAGCTCCTGAACCAGCCGGTTCATGGCCAATAATAGGTCACCTCCACTTACTCGGCGGCCATGATCAGCTTCTCTACCGAACCCTCGGAGCCATGGCTGAAAAATACGGTCCAGCATTTAATATCCGGCTCGGCAGCCGCCGTGCATTTGTAGTAAGCAGTTGGGAAGTAGCGAAAGAATGCTTTACAATCAATGACAAGGCCCTTGCCACCCGACCCACCACAGTAGCCGCAAAGCACATGGGCTACAACTATGCCGTATTCGGGTTCGCCCCCTACAGCCCCTTT…	MDSSLNIPTVCLLISFIFLYYIFIRKTKNTKTSKSTKEAPEPAGSWPIIGHLHLLGGHDQLLYRTLGAMAEKYGPAFNIRLGSRRAFVVSSWEVAKECFTINDKALATRPTTVAAKHMGYNYAVFGFAPYSPFWREMRKIATLELLSNRRLEMLKHVRASEVDIGIKELYGSWAKNAKNGTKPLLVELKGWFEELTLNVVVRMVAGKRYFGGGANACDDGEARRCQTAITEFFRLIGIFVVSDALPFLWWLDLQGHEKAMKRTAKELDLVLGGWLEEHRQRRLAGEVKGESEQDFIDVMLSLQEEGQLSNFQHDSDTSIKSTCLALILGGSDTTAGTLTWVISLLLNNRNILKKVQEELDLHVGLERQVDDSDIKNLVYLQAVIKETLRLYPAGPLLGP…
AeCYP94A1	Arel.001586	ATGGATCTATTGTCTCTCCAAACCTTCCTCTTCTCCACCATCGTTTTCATATATCTCTATCTATACTTCTTCCACCTCCAACCAAATTCCAAATTACACCCCAAAATCCCTTGTTTCAAATCCTACCCACTACTCGGATCCCTACCCGAATTCGTCAAAAACCGCCACCGCTTCCTCCAATGGAGCACCCAAGTCCTCTCCCACTGCCCCACCAACACCGCCGTATTCACCCGCCCCGGAAAGATCAACGGCATCATTACCGCCAACCCGTTAAACGTCGAACACATCCTCAAAACCAACTTTGAAAATTACCCAAAAGGCCCCCGATTCATTAATCTCCTCCAAGATTTTCTCGGCCAAGGCATCTTTAACTCGGACGGCCATCCTTGGAAAGTTCAG…	MDLLSLQTFLFSTIVFIYLYLYFFHLQPNSKLHPKIPCFKSYPLLGSLPEFVKNRHRFLQWSTQVLSHCPTNTAVFTRPGKINGIITANPLNVEHILKTNFENYPKGPRFINLLQDFLGQGIFNSDGHPWKVQRKTASYEFNTKSLRNFVMDIATVELQTGLLPILKKSSETNRGLDIQDLLERFAFNNICKLAFNVDPGCLKGDGTAGSEFMQAFEDAATLSSGRFMYVLPVFCDIKKFLNIGTERKLRNSIKIVHEFADKIIRSRLQERAERKDQDLLSRFMTETENSAEYLRDIVISFILAGRDTTSSSLTWFFWLLSSRPNVTERILQELKLIRENGGKNRGDTFSFDELREMQYLHAAISEALRLYPPVSVDTKACLNDDVWPDGMVIKKGWFA…
AeCYP716A5	Arel.025424	ATGGAGCTTCTCATCATCCTCTCTGCACTTGCAACCATTTCCATTACCACCATCTTTATTTATCTCTTTAAATTCCACAAAAACAAGTCACAATCAGTAGCTCCATACCCTCCTGGAGGAGCAGGCTGGCCTCTCTTAGGAGAAACCCTAGATTACTTCTCAAAACTCCGAAATGGCATGACCGAAAGATTTGTGATGGATAGAATTAACAAGTACTCCTCCCAAGTCTTCAAAACAAATTTACTCGGCGAGAAAATGGCACTTTTGACTGGTGCTGAGGGCAACAAGTTCTTGTTCTCGAACGAGAGCAAGTTGGTCCAAGTCTGGTGGCCGAGCTCAGTCAACACTGTTTTTTTGAAGACCGATAATCGGTCAGCTCAAGATGAATCCATTAAAGTG…	MELLIILSALATISITTIFIYLFKFHKNKSQSVAPYPPGGAGWPLLGETLDYFSKLRNGMTERFVMDRINKYSSQVFKTNLLGEKMALLTGAEGNKFLFSNESKLVQVWWPSSVNTVFLKTDNRSAQDESIKVRRLLTPFLKAEALKAYVGTMDTVCKKHLDTHWMGPQVKVCDLVRKYTFTLACQLFLSVEDPENLEKLNKTFDDVTRGVVSIPVNFPGMSFYKAIKASQEIRAVIEGMVKQRKIDIAENQATLTQDVMSKMLAAVEENKSENPVTDADIATDLLGLIIGGYETVNTSLVFIMKFLAEQPHVYEEVLKEQTEIANLKQGELLRWEDLRKMKYSWSVWCEVLRIRPPAVGAFREAIADFTYAGYTIPKGWKLHYIQNATHKNPEYFPNP…
AeCYP72A10	Arel.015189	ATGCCAAGCGTATACATCACTGACCCTCAGCTGGCACATGAAGTCATGATCAAATTTGATAAGTTTCAAAAATATTTTAAAACAACTAATCCACTGATTAAGTTCATAACTGAAGGACTTGTAACCCATGAGGGTGAGAAATGGAGCAAGCACAGAGGAATCTTGAACCCTGCTTTTCGGTTAGAGAAGCTCAAGGTTAGTCTCATTATCACAATTTCGGATCCGGTGCTCCACAATGTGGCCAATTGGCTGCCAGCATTTCATACTAGTGCTAGTGACATGGTGAGCAAATGGGAGAAAATGGTCTCCACAGAGGGTTCAGGTGAGATAGATATTTGGCCTCATCTTGAAACCTTATCTGCTGATGCTATATCACGAACAGCATTTGGTCATAGCTAC…	MPSVYITDPQLAHEVMIKFDKFQKYFKTTNPLIKFITEGLVTHEGEKWSKHRGILNPAFRLEKLKVSLIITISDPVLHNVANWLPAFHTSASDMVSKWEKMVSTEGSGEIDIWPHLETLSADAISRTAFGHSYLQGRKIFKLQREQAKLSMEAMRSVYIPGSRFFPTKRNTRMKQIEREVRDLIMHMINERIKAMKEEAIPDDMLSILLKSNFEQAQHGKNSGMSMQDIITECKLFYFVGQETSSSLLLWTMILLSKHPIWQAEAREEVLKVFGNEKLNYDGISRLKVVNMILNEVLRLYPPIIELTRIVRKETKLGELTIPAGVQLMILTILVHHDPEIWGEDAKEFKPERFSEGVSKATKNQFAYFPFGWGPRICIGQNFALLEVKMALSMILQRFS…
AeCYP83B2	Arel.022060	ATGGCTATATTTCTCTTTCTCCTTCTCCTCATTCTTGTACCTGCTCCTCTATGCCTACTACTTTTTCCACTAAAACCAAAAAAAATTGCCCGAAAACGCCGTCATCCACCAGGCCCTCAAGGGCTTCCCTTCTTAGGAAACTTGCACCAACTTGATAGCTCAACCCTTCATATCTATTTATGGAAACTTTCTCAAAGATATGGCTCCCTCATGTCCATGCAGCTTGGTTCTATCCCAACTCTTGTAGTCTCTTCAGCAAGAATAGCAAAAGAAGTCTTTAAAACACATGATCTTGCATTTGCTAGTAGGCCATCTTTACATGGACAAAGGAAACTATCTTACAATGGATTAGATGTGGCCTTTTCTCCATATAGTGACTATTGGAGGGAGATGAGAAAA…	MAIFLFLLLLILVPAPLCLLLFPLKPKKIARKRRHPPGPQGLPFLGNLHQLDSSTLHIYLWKLSQRYGSLMSMQLGSIPTLVVSSARIAKEVFKTHDLAFASRPSLHGQRKLSYNGLDVAFSPYSDYWREMRKVCVLHLFSSKRSQSFRPIREDEVARLVKKICDLASSSKLVNLNEILMTLTTSIICRVAFGKRYDEEGSERSRFHDIFNETQAMFGSFFVSDYFPLMGWIDKLRGISGRLEKNFKDMDSFYQELIDEHLNSERTSSMKGDILDILLQLKRDKQFSFDLTFDHIKGVLMNIVIAGSDTSLAAVVWAMTRLMQNPTQMKQVQEEIRKTIGKKGHVDEDDLEKLVYLKAVVKETMRLFPPAPLLVPRETIDSCVVEGYEIQPKTLVYVNA…
AeCYP708A1	Arel.021448	ATGCATTATGCAATTATAAATGAAACTGTTCGCTTGGCCAACATAGCCCCATGGATTTTCAGAAAAGTTATTAAAGATGTTGAACTGAAGGGATATACAATACCAGCAGGGTGGACAGTTATAGTCTCAACATCAGCACTTCATGTGAATCCTGCTAAGTATGACAACCCCCTTGAATTCAATCCATGGAGATGGGAGAAGGGCAAAGAATTGCACGCCGGGTCGAAGAATTTCATGGCTTTTGGTGGTGGAGTGAGACTTTGTGTGGGAGCTGAGTTCACCAAGCTGCAAATGGCCAATTTTCTTCATCACTTAGTCACAAAGTACAAGTATGTTGCTAGTTCTGAAACATACATGAAAAAAGGAATCTTATGGAAACAAGAATTCCAATTTATTTTG…	MHYAIINETVRLANIAPWIFRKVIKDVELKGYTIPAGWTVIVSTSALHVNPAKYDNPLEFNPWRWEKGKELHAGSKNFMAFGGGVRLCVGAEFTKLQMANFLHHLVTKYKYVASSETYMKKGILWKQEFQFILVEIERLNHKLDL
AeCYP707A1	Arel.003649	ATGAAAACTATTGACCGTCTGATGCTGGACCCAAAATTCGCCGGAAAGCCCATCACCGCCTTATACTCCTCCCGGACTGACATAGAGCAGATGCCGGAAACACCAAACCGGGTAGCCCACCACCGCCGGGCCCAATCCGAGACGTTCTTCCGTTTCCCGGACGACATCCTCCTGGACGACGTCGTTGCGGATTTCGACCTATCCAGCATCGACCTCCCTTCTCTATCCTCCGAAACCCCGATGACCGTCGAGTCGGACTCATCCAACGGTGCAGATAAGCCCAAAAGGTCCAGACAATTGGGCCCCAGTTCCCATTTAAGGAGCCTCTCCGTCGATGCTGATTTCTTTGACGGATTGGGGATCTCCGACGGCGGCGGTGGTGGAGAAGCCTATGGATTT…	MKTIDRLMLDPKFAGKPITALYSSRTDIEQMPETPNRVAHHRRAQSETFFRFPDDILLDDVVADFDLSSIDLPSLSSETPMTVESDSSNGADKPKRSRQLGPSSHLRSLSVDADFFDGLGISDGGGGGEAYGFGGNPAAVAGQRRYHHKHSNSMDGSTATSFDSEMAMMMDNAKKSLGPDKLAELSLIDPKRAKRILANRQSAARSKERKVRYTSELERKVQTLQTEATTLSAQFTMMQRDTSGLTIENKELKLRLQALEQQAHLRDALNDRLREEVNRLKIETGQVPAANGNSFSRALPPQFPTHPTSFHHFANHQAHQQQQQQQQQLHMPQSTRAMEILSMLIALIFVLLVGFLLNAWASPNAMDGIPGSLGWPVIGESFSFISEFSSPAGIYSFFR…
AeCYP89A1	Arel.029481	ATGAATGCAAAGCTCCCGCCGGGACCCACCTCGATTCCGGTGATCGGTCGCTTTTTATTGCTCCGCAAGTCATTCTTCGAGCTTGAATTGATCCTCAAGGACCTCAAGCTCAAGTACGGTCCAATCCTCTCCCTCAGAATTGGCTCTCGCTCCCTCATATTCGTCTCCAGCCACTCCATAGCCCACCGTGCCTTAGTCCAGAACGGCGCCGTTTTCTCAGACCGTCCCAAAGCCCTTCCCACCAACCGGATCCTTTCCAGCAACCAACACAACATCAGCTCCGCCGGCTACGGCCCCACATGGCGACTCCTCCGCCGCAATCTGACCTCTGAGATCCTCCACCCCTCTCGGGTCAAGTCCTACTCTCACGCCCGCAACTGGGTCCTAGGCATCCTCATC…	MNAKLPPGPTSIPVIGRFLLLRKSFFELELILKDLKLKYGPILSLRIGSRSLIFVSSHSIAHRALVQNGAVFSDRPKALPTNRILSSNQHNISSAGYGPTWRLLRRNLTSEILHPSRVKSYSHARNWVLGILIRRLFSESGSGESTAIKVMDHFQYAMFCLLVLMCFGDKLEENQIKQIEKVQRDLLSNLSRFSILNLWPKLGKVVFRQRWKEFFQLCQNREDVLVPLIKARIEKSNQRQEQEEFVVAYVDTLLNLQLPDEENRKLTHGDLVSLCGEFLNAGTDTTSTALEWIMANLVKYPEIQAKLYEEIVGVVGPRKQPSALSGGGPEKMVAVEEEDLQQMPYLKAVVLESLRRHPPAHFVLPHSVSEDVELDGYVVPKNSVINFMVAEMGRDPKVW…
AeCYP736A8	Arel.018000	ATGGAGCTTGCGGGTATTCTTGGAGCTTTTAATATAGCGGACTATTTGCCTTTCCTAGGGGCATTGGACCTCCAGGGATTGACTCGACGTATGAAGAGAACAAGCAAGACTATTGACAAAATCTTGGACATTATCATCGATGAGCATGAACACAATGCTAATAGCAAACATAAAGGGTTTGAATTGGATTTTGTTCATGTGATTCTATCTTTGAAAAGCACGTTCGACAGAACACATATGAAAGCAATAATACTAGATATGATATTTGGAGGAATTGATACCTCACATACTTCAATTGAATGGATCATGTCAGAACTCATAAGGCATCCAAAGGTGATGAAACGGCTTCAAGAAGAACTTAAGATCGTTATGGGAGATAATGAAATGGTAGAAGAATCT…	MELAGILGAFNIADYLPFLGALDLQGLTRRMKRTSKTIDKILDIIIDEHEHNANSKHKGFELDFVHVILSLKSTFDRTHMKAIILDMIFGGIDTSHTSIEWIMSELIRHPKVMKRLQEELKIVMGDNEMVEESHLPKLEYLHMVVRESLRLHPAAPLLVPRESTEDTVIDGYYVPKKSRIIVNAWGLGRDPNVWSKNVEEFLPERFTGCNIDLRGQDFQLIPFGSGRRVCPGMHLGLINIQLVVAQMVHCFDWELPTGKSSTELEMDEKFGLILPRANHLLAIPILRL
AeCYP716A13	Arel.033187	TTGGTAACTGAACATGAGTACTTCAACCCAGAGGCAAAGCTCCCACCGGCCAAAACCTTTTCTTCCTCCAAGAAATTTGAGGGATCTTCAGACCTCGTCAACCTCCACTACCACATGGGGCCCGTCCTCTCCTCCCCCATCAACTTCTACCTCATCTGGTACAGCAAGTGGTCCCCTACCCACAAGCTCCTCATCAAGGACTTCTTCCTCTCCATCTCCACCTCCAACCACCGTGCCGCCCCCTCCCACTCTGTCTCCGACTGGTGGCGCACCGTCTCCCTCTACACCGACCAGACCGGCGCCAACATCTCCAAGTCCGTCCTAATCGCCAGCGAGTACACCGACCACCTCTACTCCCACGACACCCACCTCACCCGCCTCACCATCCAGGACGTCATC…	LVTEHEYFNPEAKLPPAKTFSSSKKFEGSSDLVNLHYHMGPVLSSPINFYLIWYSKWSPTHKLLIKDFFLSISTSNHRAAPSHSVSDWWRTVSLYTDQTGANISKSVLIASEYTDHLYSHDTHLTRLTIQDVIAFAVRSKHFPVDHKPGSTSSSPPTTSPCRTTAVPSADSLPRWATPLSYAWVGNSGKPCPEVCAYPFAVPGTWARAGTRQMRIIFLQILKDFLIWVEQDLGPWGPLVLSDANVSFNEVGVFTLSNFLASFPFLAVMSLATAMITYYMGVIMMDTGFFRPIPDLPNMFWRYPMSHGKWFKTRLFGKIHVFVPSVVGAKTIFASDFMRFNKGYVKSMADAVGKNSLLCVPQESHKRIRRLLSDPFSMNSMAKFVQKFDNMLCERLTKLE…
AeCYP78A4	Arel.031238	ATGTCCTCTGATCAATACTTTCTTTTCTTTCCACGAAATGGGTTTTCCTCCCAATCAGGGAATTTCGAAATTTTCCTTTGTTTGGTACTTTTCCTTGCTGTTTTTGCCTTTTGGCTTTCCCCTGGTGGCCTTGCTTGGGCTATTTCCAAGGCTAAAACCAGAGCAAAAACCGCCATTCCCGGCCCATCTGGGCTCCCTCTTTTGGGTTCGGTTTTTACTTTCACTGGCTGTTTAACTCACAGAGCTTTGGCTCATCTTGCTCAGAGCTTCAAGGCTGTACCTTTAATGGCGTTTTCTGTTGGGTTTACCCGTTTTGTAATTTCGAGCCAACCCGAGTCCGCAAAAGAGATTCTTAACAGCTCTGCTTTTGCTGACCGACCCGTTAAGGAGTCTGCATAT…	MSSDQYFLFFPRNGFSSQSGNFEIFLCLVLFLAVFAFWLSPGGLAWAISKAKTRAKTAIPGPSGLPLLGSVFTFTGCLTHRALAHLAQSFKAVPLMAFSVGFTRFVISSQPESAKEILNSSAFADRPVKESAYELLFHRAMGFAPYGEYWRNLRRISATHLFSPKRVAHFGEFRREIGVKMVGEIKGLMVKNGDVEVKRVLHFGSLNNVMMTVFGKKYEFGENGDGFELEELVKEGYELLGVFNWSDHFPVLGWLDFQGVRKRCRDLVGKVNVFVGKIIKEHKLKRADNNIEGIDESCGDFVDVLLDLEKENKLSDSDMIAVLWEMIFRGTDTVAILLEWILARMVLHPEIQAKAQSEIDNVVGKTQMVSNSDLPNLPYLNAIVKETLRVHPPGPLLSW…
AeCYP714C5	Arel.016933	ATGTCCACATCCTTGAACTTAGGAAAACCTTCATATCAACAAAGAGAACATGGTCCCTTGCTTGGTCAAGGTGTATTGACCTCCAATGGTGCTACTTGGTCTCATCAGAGGAAAATTCTTGCTCCTGAATTATACGTGGAAAAGGTTAAGGGAATGCTGAATATTGTTATAGAATCTACACTTACATTGGTAAATTCATGGAATAGTAGAGTTGATGTTGAAGGTGGGGTTGTTGACATAAATATCGACGACTATATGAGAAATTTCTCCGGAGATGTAATATCAAGAGCTTGTTTTGGTGGAAATTATGCCAAGGGAGAAGAAATATTCTTGAAGCTTAGAGCTCTCCAGGAGATTACAACCAAAAAGGGTTTAGCTCTTGGGATTCCTGGAATGAGA…	MSTSLNLGKPSYQQREHGPLLGQGVLTSNGATWSHQRKILAPELYVEKVKGMLNIVIESTLTLVNSWNSRVDVEGGVVDINIDDYMRNFSGDVISRACFGGNYAKGEEIFLKLRALQEITTKKGLALGIPGMRYLPTKNNRKSWALQNEVHRLILKVVKERKEAGYEKDLLQIVLESAEKSDLSQEEMDRFIVDNCKNIYLAGYETTAVSSTWTLMLLASNPEWQTRVRDEVLDICKGQIPSNDMLLKMKQLTMVIHESLCLYSPVPVISREALTDMKFGDLHVPKGFTVWNVVHSLHTDPEVWGPDAYEFNPDRFVNGITGACKYPQFYLPFGVGPRVCLGQNLAIVELKVLVSLLVSNFSFSLSPEYVHSPCIRLVIEPENGVKLLVKKL
AeCYP94A2	Arel.008831	ATGTCAACTTCAACACACTTAATCCAATCAAAGTCCGATAAGCTTCCTCCATCATACCCTCTAATCGGTTCCCTTTTCGCAATCTTAGCGAATCGAGATCGAGTAATCCAATGGACATCAGATATTCTATTGGATTCACCCACCTCAACCTTCATCCTCCACCGTCCATTCGGCGAAGAAAGTGTCTTGACATCAAACCCCGCCAATGTAAAGCACATGCTAGAGACCAGCTTCAATGTGTACCAAAAGGGGGAAACTTTTCGCAACACTTTATCGGACTTATTCGGACAAGGCACATTTCTTGCCGACGGCGAAAATTGGAAGCACCAAAGACAAGTCTTGAGCCATGAATTCAGTCAACAAACTTTTTACAAATATTTCGAGACAGTTGTTTATTCC…	MSTSTHLIQSKSDKLPPSYPLIGSLFAILANRDRVIQWTSDILLDSPTSTFILHRPFGEESVLTSNPANVKHMLETSFNVYQKGETFRNTLSDLFGQGTFLADGENWKHQRQVLSHEFSQQTFYKYFETVVYSELTDHLLPVLSAAAANKTTLDFQDILQRFGLDTICQVACGYDEKSLLPSLPPSELGQAFHDSLRIINQRLSAFLPLIWKTKRFLNIGSEKHLRAGVIRIRNFVKESIKKKKEEQNNNNSLESLDFLSLLLVSGQSDEKFLEDMVINFILAGLESISAVLTWYFWLIPGNPDVENEIVKEISGSNADDLVYTQASILESLRLYPSVPVNSREAMNDDVLPDGTKVKKGSSVSYHNYAMGRSENLWGADWPVFKPERWLKRDEGNGSV…
AeCYP76A3	Arel.001340	ATGGAATGGTTTTCGTTCCTTGTTTTTTGGTCCATTATTATTTTGTCACCTGCGTTGGTTCTCTTCTACCACCGCCAGAAGTCTCACTCGAGCGGCCTACCTCCAGGGCCACCGAAATGGCCATTGTTTGGTAACATGTTTGATCTTGGAACCATGCCACATAGAGCTCTTGCTGGGCTAGAAAAACAATATGGCCCTGTGGTTTGGCTAAGGTTTGGCTCCGTAAATTCCATAGTTGTTCAAACAGCGCAGGCTGCAGCTGAGTTGTTTAAGAACCATGATCTCTCCTTTGCAGATCGAAACATTATCGACACCATGCGGTCACACGACTACCACAAAAGCTCCTTAGCCCTTGCCCCGTATGGCTCGTATTGGCGCGTTTTAAGGCGGATATGCACC…	MEWFSFLVFWSIIILSPALVLFYHRQKSHSSGLPPGPPKWPLFGNMFDLGTMPHRALAGLEKQYGPVVWLRFGSVNSIVVQTAQAAAELFKNHDLSFADRNIIDTMRSHDYHKSSLALAPYGSYWRVLRRICTVEMLVNKRMNETAGVRQKCINNMVHWIQKEARELKGARGIHVTRFVFLTSFNLLGNLMLSRDLVDPESKAGSEFFTAMMGLMEWGGHTNISDVFPSLRWFDLQGLRKKTDRDMKKALGIASEFVKERVQQKQQQQQRQGPERTKDFLDVLLEFEGSGKDEPPKLLERDINIFILELFMAGAETSSSSTEWALTELLRSPEKMIKVKAELAKVIGPNRKFEESDVDNLHYLQAVVKETLRLHPPIPLLIPRKATQDTEFMGYRIPKN…
AeCYP72A11	Arel.030028	ATGGAAATGGATATAGTATTTTATTTGTCAATTGCAGTGATTGTTGGTATTGTAGCATGGGCATGGAGGGTTTTGAACTGGGTGTGGCTTAGGCCAAAGAAGGTGGAGAAGTTGGTCAGAAAGCAAGGGTTCCACGGAAATTCTTACCGCCTCTTATCCGGAGATATGAAACAGAGCGCTTGGTTGATCAGAGATGCCAAATCCAAGCCCATCCATGTCTCCGACAATATTGCGCCTCGCGTCATCCCTTTAGTTTCCCATATAATCAACAACTATGGTAAGAAATCTTTTGTATGGGTTGGACCGACTCTAAGGGTACACATTATGGATCCAGAATTGATAAAAGAAGTCTTCACTAAGAATAATAAATTTCAGAAGCCGGTTTTAAACCCACTATTC…	MEMDIVFYLSIAVIVGIVAWAWRVLNWVWLRPKKVEKLVRKQGFHGNSYRLLSGDMKQSAWLIRDAKSKPIHVSDNIAPRVIPLVSHIINNYGKKSFVWVGPTLRVHIMDPELIKEVFTKNNKFQKPVLNPLFKLFTNGLPTIEGDKWDKHRKLLNPAFHLEKLKCMVPTFYLCCCEMTRKWEEMMLEGASCELDVWPFLQTFARDVISRAGFGSSYKEGSRVFELQIEQAQLAIKSVQSVYIPGVRYLPTKRNRRMKAIEREIHFSLKSIINKKMEAIKAGKGSSDDLLGILLESNFNVQHGNKNVGMSAQDVIEECKVFYFAGQETTSVLLVWTMVLLSIHPNWQAQARKEVLQVIGNGKLVFEDLSQLKIVTMILYEVLRLYPPVALLVRRVHEET…
AeCYP736A9	Arel.021406	ATGAGAAAGGAGGAGCTTGGGTTATTGGTGAAGGAGCTTAAGGATGCCGCCGCTAAATGTGAGGTGGTGGATATTAGTGCAAAGGTGGCTGATCTTATTGAGAACATGACTTATAGGTTGCTTTTGGGACGTAGCAAAGATGATAGGTTTGATCTCAAGGGTATTATGAATGAGGCCTTCCTGTTGGCTGGAAAGTTCAATCTTGCAGATTTTGTGCCTTTCCTAGCCCCACTTGACCTTCAGGGATTGACTCGAAGCTTTAAGGAAGCCGGCAAGAAACTTGACAAAATGTTGGAGCTAATTATTGATGAGCATGAACAAAACGCAAGCAATGGACTTCAAAAGAAAAATACCGACTTTGTTGATGAAATGCTATCATTGATGAAAAATTCCACAAGC…	MRKEELGLLVKELKDAAAKCEVVDISAKVADLIENMTYRLLLGRSKDDRFDLKGIMNEAFLLAGKFNLADFVPFLAPLDLQGLTRSFKEAGKKLDKMLELIIDEHEQNASNGLQKKNTDFVDEMLSLMKNSTSTHHELAKAIDRSSIKSIMVDIITAAIDTSYTSIEWILAELIRHPRVMKKCQEEVNTIVGLDRMVEETDLPKLEYLYMVVKEGLRLHPIAPLLGPHESREDIVIDGYYIPKKSRVIVNAWALGRDPNVWSEDVEEFLPERFTRSKIDLRGRDFQLLPFGLGRRGCPGMQLGLINIQFVLAQLLHCFDWELPSGISTGDLDMTEKSGLTIPRIQHLLLVPKVRI
AeCYP76T1	Arel.026596	ATGGAGTTGCAGAGTTTTCTTTCTTGTTTCATTCTCTTCTTACTTATTATCCATTGCCTTTCATTATTTCGTAAAAGAAACCTTCCACCAGGTCCCAATGGCCTCCCCATTTTCGGAAACCTCTTCGATATTGGTTCCAGACCCCACGAGTCCTTGGCCAAGCTAGCTAAGAAATATGGTCCTCTCATGACCATTAGTCAAGGCAGTGTAACTACTATTGTTGCTTCTTCTTCAGATCTGGCTAAACAAGTCCTTCAAAAACACGACGACGCTTTCTCCGGCAGAATAATCCCGTCCGCCATCTCTCAACTAGACCACCCGGCCCACGCAGTGGCATGGTTGCCTACCGGAGACCAATGGCGACTTATCCGACGAGTTTTAAGCACTTTCTTGACAAAC…	MELQSFLSCFILFLLIIHCLSLFRKRNLPPGPNGLPIFGNLFDIGSRPHESLAKLAKKYGPLMTISQGSVTTIVASSSDLAKQVLQKHDDAFSGRIIPSAISQLDHPAHAVAWLPTGDQWRLIRRVLSTFLTNSQKLDMLVELRHKVMEQMVEHVKKASKFDQAVGINKLAFTTAINQMSNTCFSTNVDEFNESHQDDKGFKRAVATIMEIAVKFNVADYFPLLKAMDPQRLRPKAHAAYGCLEELCDKFINQRLQHRESNLPRHGDLLDSFLDFSQENESDFNLKHIQVLLVELFLAGTETSTNTTEWAMTELILHPDIMIKLRNEISKAVREKGRMEESDILQLPYLQAVVKETMRLHLAVPFLIPHKSERDVNLSGYLIPKNTQVMVNAWAIARDA…
AeCYP72A12	Arel.012515	ATGGAATTATTTTTTGGAGACCTGAAAGACATGGTTGCGATGATGAAAGAAGCCAAATCCAAACCCATCAATCTCTCTGACGATATTGTCCCCCGCGTCATGCCCCTCAACCATAAAACCATCCAAACCTATGGAAAGAACTCATTTTTATGGCTTGGACCAAAACCAGTGGTCCACATATTGGACCCTGATCATATCAAAGAGATCTTGACTAAGTTTTATCAGTTCCAAAAGCCCAGGGGAGGTAATCCTTTAACAAAATTGCTTGCAACTGGACTAGTAGATGCTGAGGGTGACAGATGGGCCAAACACAGGAAACTCATCAACCCTGCTTTCCATCTTGAGAAATTGAAGAATATGCTGCCTGCCATTTATTTGAGTTCGAGTGAGATCATGACC…	MELFFGDLKDMVAMMKEAKSKPINLSDDIVPRVMPLNHKTIQTYGKNSFLWLGPKPVVHILDPDHIKEILTKFYQFQKPRGGNPLTKLLATGLVDAEGDRWAKHRKLINPAFHLEKLKNMLPAIYLSSSEIMTKWEEMVSTKGQFELDVLPYLETFTSDVISRTAFGSSYEEGRKIFQLQREQAELIIQASQTIYLPGMRFLPTKRNKRMKEIAKEVKLALKSIINKRLQAMEAGECSHDDLLGILLESNSKEIKQHGNKNFGMTIDEVIEECKLFYFAGQETTSNLLVWTMILLSQHQDWQKRAKEEVLQAFGNNKPDLDGLNHLKVVNMILLEVLRLYSPVVSLGRTAESHRSVIWNWIDEWTSHNHQTYPLDAESLYCRHFSTTEFFSRDLDFIFN…
AeCYP71D8	Arel.033422	ATGGAGTTCCAATCCCCCATTTTTATTATCTCCTCTCTCATCTTCCTTTTCTTCTTTCTGTTGTTATTAAAGGAATCCAAAAGATCCAAAACCGGTAACAGAAGTACAAAACTGCCACCAGGGCCATGGAAGCTACCTCTCATAGGAAATTTGCTCCAAGCGGCTGGCACTGTCCCGCATCGCGTTCTCCGAGAGTTGTCAAACAAACATGGACCCCTCATGCATCTTCAACTCGGCGAAATCTCTGCCATCGTCATATCATCACCTAGAGTTGCCAAAGAAGTGCTAAAAACGCACGATATTGCCTTTGCAGACAGGCCATCAGTTTTACTAGGCCAAGTTATTTTGGCCAACTGTAGAGACGTTGTGTTGGCTACTTATGGTGATTATTGGAGACAA…	MEFQSPIFIISSLIFLFFFLLLLKESKRSKTGNRSTKLPPGPWKLPLIGNLLQAAGTVPHRVLRELSNKHGPLMHLQLGEISAIVISSPRVAKEVLKTHDIAFADRPSVLLGQVILANCRDVVLATYGDYWRQMRKVCTLELLSANKVRSFRSIREEESFNLVESIRSSLGSPVNISEKVSELANGITCRATIGKRCKYQDELIKVVEDIAYLGSGFFMADLFPSLKFLPVLSGMKPRLQKVRRKLDRIFDNIMQEHREKLASIKKGTVLDAEEEDLLDVLLRINDSNSLEFPISSNDMQGIILDMFTAGTDTSSAILEWAMSELIKHPSAMEKAQDEVRQALKGKESIYEADIQGLKYLKFVIKETLRLHAPVPLLLPRECRKECEIDGYTIPLKTKV…
AeCYP94A3	Arel.006048	ATGTTGTACCTTGAGCTTTCATCATTGTACTCAATCTTTTATCTTCTGGCATTTTTTCTCTTGCTCTTTATTTACTTCAAGTCAACTTCAACATACTCCAATTCCACCCCTTCCAAACCTAATAAACTTCCCAAGTCATACCCCTTAATTGGATCTTATTTCACAATTTTGAAAAATCGAAAGCGCGGAATCCAATGGACATCAGACATTCTTGCAGCTTCAAGCAACTCAACCGTCGTTATTATCGGCCCATTGGGCCTCCGTAGATTCTTCACCTCCAATCCATTGAACGTTCACCATATCACTAAAGCTCGTTTTGATATCTACCAAAAGGGCCATGTCTTTCGAATGACATTCTCGGACTTATTTGGCGACGGAACTTTTGTTGCTGATGGTGAA…	MLYLELSSLYSIFYLLAFFLLLFIYFKSTSTYSNSTPSKPNKLPKSYPLIGSYFTILKNRKRGIQWTSDILAASSNSTVVIIGPLGLRRFFTSNPLNVHHITKARFDIYQKGHVFRMTFSDLFGDGTFVADGEKWRVQRLELAHQLNMKGFLKYVETVVDSKINDRLLPLLSAAAEKNIILDFQEILQRFFFDNICQIALGHDPQCLLPSLPNSELANSFRSCTRYISKRYISFLTLIWRTKRFLNIGDEKKLNLAIKYVRDFIQGIIKEKKHKLGQDKTMVLSSNDLLSLHLNAGQFDETILTDKMIDFILAGNDTLSSALTWFFWLLSKNAKIENEILAEINKKSIKVLTFDGTKYMVYMHAAISESMRIYPPIPWNPREAMQDDIWPDGTKIRKGT…
AeCYP71B1	Arel.012909	ATGGAGCTTCAATTCCCCTTTATTCTGATCTTCTGTACTTTCCTGCTCTTCTTGTTCGTGGTTATGAAGGACTCGAAAGCTAGAGCCCCCATCCCAAGACTGCCACCAGGTCCAATAAAACTGCCTGTCATTGGGAATTTGCTCCAATTAAGTGGTGCACTGCCTCATCACTCTTTGAGGGACTTGTCCAAAATATATGGACCTATTATGTACCTACAACTTGGTCAAATTTCTGCTGTTGTAATTTCATCAGCAGAAGCGGCTAAAGAGGTAATGAAAACCCATGACCTTATCTTCTTGAATAGACCGGTGCTTCTTGCTAGCAAGATACTGTTTTACAACTGTACAGGGATTATATCATCCAACTACGGCAACTACTGGAAAATGCTGCGAAAAATT…	MELQFPFILIFCTFLLFLFVVMKDSKARAPIPRLPPGPIKLPVIGNLLQLSGALPHHSLRDLSKIYGPIMYLQLGQISAVVISSAEAAKEVMKTHDLIFLNRPVLLASKILFYNCTGIISSNYGNYWKMLRKICISELLSAKRVESFRLIREQEVGYLIGSIPLSGETPINLTDKFFSMTNAIVSRAAFGQKCKHQEEFLKMMKEIAKLASGFDLPDIFPSFAFLHSFSRAKPALEDIHRRLDKILDNIIVEHRANRSIDKSCEEDLVDVLLKLQESSDLEVPITTNNIKAIILDIFMAGTETSSTTLDWVMSEMMRNPRVMDQAQAEVRKVFKGKSKIQETHIEELHYLKLVIKETLRLHPPGPLLLPRESRERCEINGYEVPAKTKLIVNAWAIGRD…
AeCYP714C6	Arel.016579	ATGGTGAAGATTCAACGGCGGCATCAGCAGCAGCAGCAGAACTACCCGTCAACTCCTAAAGACCACTGTGGGGAGGGCGGCGCCGCCGCCTTGGCTCATGATTGGCCTGCCACCGTTTTCTCTCATATTGAGGAGTGGAGACAGGAATATGGACCTGTATTCATGTATTCAACTGGGAGCATACAAATACTATGCATAACAGATCCAGAAATGGCGAAGGAAGTTGGCCTCCACACCTCTTTGAATCTGGGGAAGCCTTCTTATTTATCGAAGGACCGTGGGCCTTTGCTGGGCCAGGGAATTTTGACCTCAAGTGGCCCTCACTGGGCCCACCAAAGGAAGATCATTTCTCCTGAGTTCTACCTTGACAAGGTTAAGGACATGGTTAACTTAATGGTA…	MVKIQRRHQQQQQNYPSTPKDHCGEGGAAALAHDWPATVFSHIEEWRQEYGPVFMYSTGSIQILCITDPEMAKEVGLHTSLNLGKPSYLSKDRGPLLGQGILTSSGPHWAHQRKIISPEFYLDKVKDMVNLMVESTLPMLESWGSKAEKGGGYAEIKVDESLRRLSADIISRASFGSNYAQGENIFLKLRALQEVMSKGNIGVPGSRYVPSKNNREIWRLEKEINTMIVQVVRSRREAKSERDRDLLQSILEAAKEYEDTDGLPPDITLDKFIVDNCKNIYFAGHETTATSATWCLILLAAYPEWQGRTRAEVLKVCGDKLPDADMLRSMKMLTMVIQETLRLYPPVAYMGRETMQDMKFKDIEIPKGTNLQIVKPILHQNPDIWGPDVHQFNPERFAD…
AeCYP76AD1	Arel.031168	ATGAAGACGGCTCTCCTTCAACTCCATTATCGCAAAGTTCTCGTGTCTCCAGGGCAAGCAGCTTTGGCAGGCATGATAGGCATTGGGGGCGTTGGGCGCGTTGCTTCAGATGCATGTTTACATGGATTCTATTCCCTGCAAGATTCAGATACTACCAAGAAAGCAGACACCCTCAAGGACCATGTCGTGCAATGTGCCACTGACAGGAGACGTGGACTGATAGAGGATCTTCATCTAGGAATTGAGATCTTTATAGAAGCTGTATTTGATGTTGTCCACAAGGCAACACGTTGTCTTATCTCGCCATTAGACACGTCCAGAGCACTATTAAGATGGTTTTCTTTTCATAGGAGTAAAGACATTCCTCATAGTGCTTCAGATGCTTCTGTTCCTACTGCT…	MKTALLQLHYRKVLVSPGQAALAGMIGIGGVGRVASDACLHGFYSLQDSDTTKKADTLKDHVVQCATDRRRGLIEDLHLGIEIFIEAVFDVVHKATRCLISPLDTSRALLRWFSFHRSKDIPHSASDASVPTATLGETNPTPTERPVTFRDSLNTDGRTCRDVITELGYPYEAIRVVTADGYVLLLERIPRRDARKVVYLQHGVFDSSKGWVSNGVVGSPAFAAFDQGYDVFLGNFRGLVSKEHVDKNISSRYWRYSINEHGTEDIPAMIEKIHEVKMSELKSSQPNLEEEETNGNHQPYKISAICHSLGGAGILMYVITPRIEEKPYRLSRLILLSPAGFHDDSAFLFKILEYVFHWLAPILEPLVPGFYIPTRFFRMLLNKLARDLHNYPAVGGLVQ…
AeCYP736A12	Arel.031172	GGATTGACTCCACGTCTCAAGACCACTAGCAAGGCTGTTGACAAAATCTTGGAGTCTATCATCGATGAGCATGAACAAGATGCTAGCGGTGGGCACAAAAGAGATTTTGTTGATGTCATTCTATCTTTGAAAAAAAATTATTCAAGTACCCATGACCAATTATCCAACACAATTGATAGAACAAATATCAAGGCAATTATACTAGACATGATCGTTGGAGGCATCGATACCGCGCAGAGTGCCATTGCATGGACAATGTCAGAACTCATAAGGCATCCGAGGGTGATGAAACGGCTTCAAGAAGAACTTAATGCTATTGTAGGAGATAATGAAATGGTGGAAGAAGCTTATTTGCCCAAGTTAGAATACCTAGACATGGTAGTTAAAGAAAGTCTGAGG…	GLTPRLKTTSKAVDKILESIIDEHEQDASGGHKRDFVDVILSLKKNYSSTHDQLSNTIDRTNIKAIILDMIVGGIDTAQSAIAWTMSELIRHPRVMKRLQEELNAIVGDNEMVEEAYLPKLEYLDMVVKESLRLHPVAPLLVPHESMEDIVINGYYIPKKSRIIVNDWGLGRDINVWSDNVLEFLPERFIGRNIDLRGQHFQLIPFGSGRRGSPGTYLGLINIKLVVAQLVHCFNWELPIGMSPDELDMDEKFGLSLPRAKPLLAIPTLRI
AeCYP71D9	Arel.030189	TTATCTTTCTTTTATCTTGATGGACCTCCATTTTCCATCCTTCATAATCCTTTTTACCTTCTTCCTCTGTGTGCTTATGCTACTGAAGTTACGAAAAAATCCAATAGTCATCACCTGAAATCACAATTACCCCCTGGGCCATGGAAAATCTGCGAAAGAAGTGGTCAAATTTCCACTACTGCTGTGTCTTTACCAGAATCTGCGAAAGAAGTGATGAAAACCCGTGATATCATCTTTACTTCAAGGACTCCTTCTAATGCTGGATCGCCTATTAAATTGTTGTTTGCATCTAGTATTCCTCGTTTGCATCTGATGTTGTGGCTTCAATTTCTCTCCTACTCAATCTTGCTAACCTCCCTCTTCTTTGTGTTTATGCTAGTCAAGTTTCGAAATAAATCC…	LSFFYLDGPPFSILHNPFYLLPLCAYATEVTKKSNSHHLKSQLPPGPWKICERSGQISTTAVSLPESAKEVMKTRDIIFTSRTPSNAGSPIKLLFASSIPRLHLMLWLQFLSYSILLTSLFFVFMLVKFRNKSKTSNLPPGPWKLPIIGSIHHLAGSLPHHALRELAKKHGPIMHLKLGEVCAVVVSSPETAKDVMKTHDINFASRPLILATNIISYDSTNIVFAPYGDYWRQLRKICTLELLSTKRVQSFRSIREEEVANLITLIAANAGLPINLTEKIYSAAYSTTSRAAFGKETTDQQRFILIVKELTKAAAGFNLADLYPSIKLFEWISGMRPKLERLQQQTDRIVGNIINDHKEGKAKKNYEGEEHEDLVDVLLKFQDGSAEFQLTTDNIKAVL…
AeCYP86B1	Arel.014086	ATGCACTACCACATTTCTCATCTTCCCAACATCATCAACAGCCCTAGCAACATTACTTCCTCTCTCTCCTCCGGCAACTCCATGGCAGAAAAACTCTTCTTCCTGCCGGAGATCCAACTATTAGAACTCTTTCTTGCTCTTCTAGTTTTTGTCGTGATACATTCCCTCCGGCAGAAAAGGCGTCAAGGTCTACCAGTATGGCCGGTCATCGGAATGTTACCTTCCTTGGTTTCCGGTCTTCGAGTCAACATGTACGAGTGGATTTCCGATGTGCTTTGTCGTCAAAATGGAACTTTTATGTTCGAAGGTCCTTGGTTTACTAATCTCAAGTGTGTAGTCACTTCGGATCCACGAAACTTAGAGCACCTTCTCAAGACTAAGTTCTCGAATTACCCTAAA…	MHYHISHLPNIINSPSNITSSLSSGNSMAEKLFFLPEIQLLELFLALLVFVVIHSLRQKRRQGLPVWPVIGMLPSLVSGLRVNMYEWISDVLCRQNGTFMFEGPWFTNLKCVVTSDPRNLEHLLKTKFSNYPKGEYFRNALRDLLGNGIFNADDEIWQQQRKTASIEFHSAKFRHLTTESLLELVHARLLPVLEESVQKSTAIDLQDILLRLTFDNVCMIAFGVDPGCLRPGLPEIAFAQAFEAATEAAIIRFVTPTLIWKTMRYLNLGTEKKLKRSIKGVDVFAEEVIRTRKKELSLQSEDEKQRSDLLTIFMRLKDENGQAFPDKFLRDICVNFILAGRDTSSVALTWFFWLLDGNPEVEAKILFEICRIIGQREDGKKGEDESPLIFRPEEVKKME…
AeCYP736A13	Arel.031615	ATGGCAAACCGAGATGCTGTCGATAAGATCTTGGAAATTATTGTCGATGAGCATGAAGAAGCTGCTAGAAATAATGAACATAAAATGCATGAAAGGGATTTTGTTGATGTATTATTATCAGTAAATGGAAAGTCTTCAAATACACATGATGATCTATCACACATGATTGATCGAAATAGCCTCAAAGGAATCATAGTAGACATGATTGCAGGAGCTATTGATACTTCACATACGGCAATTGAATGGATCATGACAGAACTCATAAGGCATCCGAGAGTCTTCAAAAAACTTCAAGAAGAAGTTAAGAATGTTGTGGGAGACAATGAAATCGTTGAGGAAACGGATTTGGTCAAGTTTAAATATCTGGATATGGTGATTAAGGAAAGTTTTAGGTTACAT…	MANRDAVDKILEIIVDEHEEAARNNEHKMHERDFVDVLLSVNGKSSNTHDDLSHMIDRNSLKGIIVDMIAGAIDTSHTAIEWIMTELIRHPRVFKKLQEEVKNVVGDNEIVEETDLVKFKYLDMVIKESFRLHPTVPLLVPRESMEDIVISGYFIPKHSRIFINSWAMGRDADLWSENVEEFLPERFIDKHINFRGHDFEFTPFGSGRRGCPGMHLGLINTRQIVAQLVHCFDWELPTGMSASDLNMDERFGLTLPRAKQLCAVPSLRL
AeCYP71D10	Arel.031392	ATGATAACGCTAAGCAAGCTAATAACTAAAATGGATCTTCAAATCCCCTTTTCCATCCTCACTTTTCTCCCCCTCGTCCTCCTCATCATTTTCCTCTCCAAAAAAACAACCCAAAAACTTCCCCCTGGACCCCGAAAACTTCCCATAATTGGAAACATTCTTGAATTGGCAGGTGAAGTCCAACATCGTACTCTCCGAGATTTGTCCCAGAAACACGGTCCCATAATGCATCTTCAACTTGCTGAAATTCCCGCAATTGTCGTCTCATCCTCTAAAGTTGCAAAAGAGGTACTAAAAACGCATGATCTTGCCTTCTCCGACAGAGCTCAACTTCAGCTGAGCAAGATCATTCTACGCGATTGTAAAGACGTTGTTTTCAATCTCTACGATGATTACTGG…	MITLSKLITKMDLQIPFSILTFLPLVLLIIFLSKKTTQKLPPGPRKLPIIGNILELAGEVQHRTLRDLSQKHGPIMHLQLAEIPAIVVSSSKVAKEVLKTHDLAFSDRAQLQLSKIILRDCKDVVFNLYDDYWRQMRKVCTVELLTASKVNSFRAIREDEARNLVESIKSSLNSHVNLTHKFSTLANAITCRAAIGERSKYQDELVHLIDMMAALGGGFDIADLFPSYRFLHVLSGLRAKLEKVRKQLDDIFYNIIKEHKEKRAKSQLVDGRVDGEEDLVDVLLRVQEKAGTDTASTLLDWAMSELVRNPQVLRKAQAEVRRAFEGKTKINEVDVQGLSYLKLVIKETLRLHPPAPLLLPKECREQCEIEGYTIPVRTKLIVNAWAIGRDPEYWVDAEV…
AeCYP736A14	Arel.031144	ATGATTGTTAATGAGCATGAAGAAGCTGCTACTAGTGGAAGTAAAAAGCTTGACCTGGATTTCGTCGATGTACTATTATCATTATTGGATAAATCCTTAGAAAATACTTATGCTGAGCTATCACACATGCTAGATAGAAGAACCCTAAAAGGAATTATAGTAGATATGATAGCAGCCGGTATTGATACTTCACACACTGCAATTGAATGGATTATGGCTGAACTCATAAGACATCCGAGTATCATGAAACAACTTCAAGAAGAAATTAAGAGTGTTGTTGGAGTTAATGAGATTATCGAGGAGACTGATTTGACTAAGTTTACGTACCTAGACATGGTGATTAAAGAGAATTTTAGGTTACATCCAGTTGTGCCACTCTTAGTTCCCCGTGAATCGATG…	MIVNEHEEAATSGSKKLDLDFVDVLLSLLDKSLENTYAELSHMLDRRTLKGIIVDMIAAGIDTSHTAIEWIMAELIRHPSIMKQLQEEIKSVVGVNEIIEETDLTKFTYLDMVIKENFRLHPVVPLLVPRESMEDIVIDGYYIPKKSRVLINSWTLGRDPDLWSENVEEFIPERFIVGVDFFGHDYKFLPFGSGRRICPGMHLGLINVRQIVAQLVHCFDWELPNGMSLSDLNMDEKFGLTLPRAQHLLAMPVRRL
AeCYP77A2	Arel.009877	ATGGATCCAATCTCATTTTCCTCTCTTTCCCTTTACTACCATATCATATTCACAGCTCTAGCCTTCCTTTTATCGGGTCTAATCTTCTTGTTGAACCACAAAACAAACTCCAAGAGGATCCGTCTTCCTCCAGGTCCACCGGGCTGGCCTGTGGTTGGCAACCTATTTCAGGTTGCCAACTCGGGCAAACCCTTCTTTCAATATGCTCGAGAATATTTGATACCCAAATATGGCCCGATACTTACTCTCAAAATGGGTACCCGAACCATGATTATAATTAGTAGTGCGGAGTTGGCCCGTGAAGCGTTGATTGAAAAGGGTCAAGTTTTTGCTAGCCGGCCCAGAGAAAGCCCGACCCGAACCATTTTTAGCTGCAATAAGTTCACGGTCAACGCCTCC…	MDPISFSSLSLYYHIIFTALAFLLSGLIFLLNHKTNSKRIRLPPGPPGWPVVGNLFQVANSGKPFFQYAREYLIPKYGPILTLKMGTRTMIIISSAELAREALIEKGQVFASRPRESPTRTIFSCNKFTVNASLYGPVWRSLRRNMVQNMLSATRLRGFRDVRDGAMDKLVDRLKAEAAANGGAVWVLKNARFAFFCILLTMCFGIEMDEEMIERVDHMMKRVLITVDPRLDDYLTLLSPFFSKQRKRANQVRKEQIETLIPLINRRRLALENPGSDKTATSFSYLDTLFELQIEGRKATPNNDEIVTLCSEFLNGGTDTTGTAIEWAIARFIDNPDIQTKLYEEIKSKVGDRKVDENDLQKMPYLNAVSKELLRKHPPTPFSLTHAVIEPAKLAGYDI…
AeCYP76A4	Arel.033195	ATGGAATGGTTTTCGTTCCTTGTTTTTTGGTCCATTATTATTTTGTCACCTGCGTTGGTTCTCTTCTACCACCGCCGGAAGTCTTACTCGAGCCGCCTACCTCCGGGGCCACCCAAATGGCCATTGTTTGGTAACATGTTTGATCTTGGAACCATGCCACATAGAGCTCTTGCTGGGCTAGAAAAACAATATGGCCCTGTGGTTTGGCTAAGGTTTGGCTCCGTAAATTCCATGGTTGTTCAAACAGCGCAGGCTGCAGCTGAGTTGTTTAAGAACCATGATCTCTCCTTTGCAGATCGAAACATTATCGACACCATGCGGTCACACGACTACCACAAAAGCTCATTAGCCCTTGCCCCGTATGGCTCGTATTGGCGCGTTTTAAGGCGGATATGCACC…	MEWFSFLVFWSIIILSPALVLFYHRRKSYSSRLPPGPPKWPLFGNMFDLGTMPHRALAGLEKQYGPVVWLRFGSVNSMVVQTAQAAAELFKNHDLSFADRNIIDTMRSHDYHKSSLALAPYGSYWRVLRRICTVEMLVNKRMNETAGVRQKCINNMVHWIQKEARELKGARGIHVTRFVFLTSFNLLGNLMLSRDLVDPESKAGSEFFTAMMGLIDLWGDHANISDVFPWLRRFDLQGLRKKTDRHMKKTLGIASEFVKERVQQKQQQLQGPERTKDFLDVLLEFEGSGKDEPPKLLEQDINIFILELFMAGAETSSSSTEWALTELLRSPEKMIKVKAELAKVIGPNRKFEESDVDNLHYLQAVVKETLRLHPPIPLLIPRKATQDTEFMGYRIPKNT…
AeCYP71C1	Arel.003982	ATGAAACAAAAGAAGAAAGCTGTAACAAGTAAGAACCTTCCACCAAGTCCTCCAAAACTTCCCATTATAGGAAACTTACACCTACTAGGCAAGCTGCCTCACCAAGCCTTGTGGCAACTTGCGCAAAATACCGGTCCGGTCATGCTACTAAAGTTTGGTAGCAAATATACCCTGCTAATATCCTCAGCTACCATGGCCAAAGAGATCTTGAAAACTCATGACCTTAATTTTTGTACCCGGCCTAATTCGTCCGGGGCAAAAAGACTTACTTACAATTGCTTAGATGTAGCTTTTGCACCATATGGTGATCATTGGAGAGAGATGCGCAAACTCTTTGTTACTGAGCTATCGAGTTCCAAAAGAGCACCACAATTTCAAAAGTCAAGGGAGAAGGAGGTT…	MKQKKKAVTSKNLPPSPPKLPIIGNLHLLGKLPHQALWQLAQNTGPVMLLKFGSKYTLLISSATMAKEILKTHDLNFCTRPNSSGAKRLTYNCLDVAFAPYGDHWREMRKLFVTELSSSKRAPQFQKSREKEVNELINFLSSKSGSPVHLDEKFCCMMDEIVSVVAFGKSHRGEKFNGKELKEVIGDAMMILDSFSAGDFFPWIGWIIDLISGERKRLEKCFKQLDGYFQMVLDEHLDKARLKLGHDEQDVADSMIRRLSKGETIGNSCLTKNHIKAIFLNIFLGGVDTSSVTMAWAMSELIKNPRVMQKLQTEIRQLVPSKSKVQEADLPNLTYLKMVVKETLRLHAPVPFLIPHESICHSKIGGFDIFPKTRVLVNVWGIGRDPNSWNNPNKFFPER…
AeCYP76AD2	Arel.031163	ATGGAATTCCTAACTTTAATTATATCCTCCTTGTTTCTCTTATTTTTTATACATCATGGCCTAGCCCTATATCATAGAAGAAAACTTCCACCAGGACCAATTGGCCTTCCATTATTCGGAAACCTCTTCCAAATAGGTCCAAAACCACACGAATCATTTACAAAATTAGCCGAAAAACACGGCCCCCTGATGACAATTAGCCTAGGCAATGTCACAACTATTGTAGCCTCTTCACCGGTAATGGCTAGAGAAATTTTACAAAAAAAGGATGAGGTATTTTCCGGCAGAGTGGTTCCCAATGCTGTCACCGCACTGACGAATTATGACCTAGCGCTGCCGTGGATACCGGCGGGAGATCAGTGGCGCGTTATTCGACGAGCGTTGAGCACTTATTTAACA…	MEFLTLIISSLFLLFFIHHGLALYHRRKLPPGPIGLPLFGNLFQIGPKPHESFTKLAEKHGPLMTISLGNVTTIVASSPVMAREILQKKDEVFSGRVVPNAVTALTNYDLALPWIPAGDQWRVIRRALSTYLTHPQKLDMLQGLRYKVVEQMVEYVKEISQRGEYVDIGKLAFTTALNQMSNTCFSVSVADFRSQDVKGFQNAVKTIMEVDGKFNIADYFPWLKVFDPQGIRRDAKGAYDWLDELIENFITKRLGHRAANLPRYGDLLDSLLDFGQESGVEFKLKHIKILLMDLFIAGTETNSTTTEWAMTELLLNPNIMAKVRQEITEKIGAKGNIEEAEILELPYLQSVLKETMRLHLVVPLLLPHKTETDVNLSGYLIPKDTQVLVNAWGIARDPD…
AeCYP76T2	Arel.020073	ATGGAGCTGTTGAGTTTTCTTTTATGCTTCTTGTTGTTCTTGCTTATTAACCATTACTTTGCATTAACTCGTAGAAGAAACCTTCCACCAGGTCCCTGTGGCCTCCCCATATTCGGAAATCTCTTCGATATCGGTCCTAATCCCCACGAATCATTAGCCAAGCTAGCCAAAAAATACGGCCCCCTCATGACAATCCGGCGAGGCAGCCTCACTACAATTGTGGCTTCCTCCGCCGAGATGGCCAAAGAGATCCTACAAAAACACGACGACGCTTTTTCCGGCAGAACAATACCCGACGCCATCGCTAAACTAGACCACCTAGCCCACTCGGTGTTATGGTCGTCTACCGGAGACCAATGGCGACTAAACCGACGAGTTCTTAATACTTTCTTGACAAAC…	MELLSFLLCFLLFLLINHYFALTRRRNLPPGPCGLPIFGNLFDIGPNPHESLAKLAKKYGPLMTIRRGSLTTIVASSAEMAKEILQKHDDAFSGRTIPDAIAKLDHLAHSVLWSSTGDQWRLNRRVLNTFLTNTQKLDTLRELRHKVVQEMVEHVKEVSKLGGDEAVGISKLAFTTAINQMSNTCFSENVAEFRSKDANGFKTAVSTIMEVVSKFNVADYFPFLKGIDPQGMRPKAKLAYGCLEGLCVKFINQRVRHREFNLARHGDLLDSFLEFSQENESDFNLKRIQVLLVVHMTHSLFLLLLYELFLAGTDTSTNTTEWALTELILHPEVMIKLRKEITQSVREKGRIEEAEILRLPYLQAVVKETMRLHLAVPFLAPHKTEKDVKLNGYLIPKNT…
AeCYP72A16	Arel.012507	ATGCTAAATATGCTGCCAGATTTGAGTTCGAGTGAGATTATGACAAAATGGGAAAGGATGGTTTCTACAAAAGGGCAATTTGAGCTGGATGTATGGCCTTATTTAGAAACTTTAACGAGCGATGTCATTTCGCGTACAACATTTGGCAGTAGCTATGAAAAAGGAAGAAAGATATTTCAACTAAAAAAGAGCAAGCTGAGTTAG	MLNMLPDLSSSEIMTKWERMVSTKGQFELDVWPYLETLTSDVISRTTFGSSYEKGRKIFQLKKSKLS
AeCYP736A15	Arel.031148	ATGATTGTTAATGAGCATGAAGAATCTGCTACTAGTGGAAGTAAAAAGCTTGACCTGGATTTCGTCGATGTACTACTATCATTATTGGATAAATCTTCAGAAAATACTTATGCTGAGCTATCACACATGCTAGATAGAAGAACCCTAAAAGGAATTATAGTAGATATGATAGCAGCCGATATTGATACTTCACACACTGCAATTGAATGGATCATGACTGAACTCGTAAGACATCCGAGGATCATGAAACGACTTCAAGAAGAAATTAAGAGTGTTGTTGGAGTTAATGAGATTATAGAGGAGACTGATTTGCGTAAGTTTGCGTACCTAGACATGGTGATTAAAGAGAGTTTTAGGTTACATCCAGTTGTGCCACTCTTAGTTCCCCGTGAATCGATG…	MIVNEHEESATSGSKKLDLDFVDVLLSLLDKSSENTYAELSHMLDRRTLKGIIVDMIAADIDTSHTAIEWIMTELVRHPRIMKRLQEEIKSVVGVNEIIEETDLRKFAYLDMVIKESFRLHPVVPLLVPRESMEDIVIEGYYIPKKSRVLINSWTLGRDPDLWSENVEEFIPERFIAGVDFFGHDYKFLPFGSGRRICPGMHLGLINVRQIVAQLVHCFDWELPNGMSLSDLNMDEKFGLTLPRAQHLLAMPARRL
AeCYP71B2	Arel.000236	ATGGATCAGAACAAGCCCAATATCCGCCCGGTCCACGAAGACTTCCCTTCATCGGAAACTTGCACCAGCTTGATATCCCCCAACCTTGCACGCCAATTATGTCTTCTTTCTAAGAAATATGGACCCATCATGTCCCTACGGCTTGGTTTCCGGTCAGCTCTAGTTATTTCTTCACCGAGAATGGCCAAAGAGGTTCTGAAAACGCATGACCTCGCATTTTGTAGCAGGCCCACATTGCTTGGACTCAAGAAGATGTCTTACAATGGATCCGATGTGGTCTTATCACCATACAACGAGTACTGGAAGGAAATGAGAAAAATTGTGACCCTTCATCTGTTTAGCAACAACAAAGTCCATTCCTTTCGGCCTATTCGAGAAGACGAAGTTTTTCAGATGATC…	MDQNKPNIRPVHEDFPSSETCTSLISPNLARQLCLLSKKYGPIMSLRLGFRSALVISSPRMAKEVLKTHDLAFCSRPTLLGLKKMSYNGSDVVLSPYNEYWKEMRKIVTLHLFSNNKVHSFRPIREDEVFQMIKGISESSEIINLTQTMMTLTSTIICRVAFGKKFDRVYKKRFQGLMEECQVVMANFYLSDHFPLMGWLDKFTGSIARLERTYKDMDLFYQELIDEHLSPDRPSSMHGDVIDILLQFRGDAQLSSIDFTFDNIKAILMNIFLAGTETTAGTINWIMTCLIKNPRVMKKAQEEVRKLIGKKERIDEEDLQNIELPYLKAVIKEGLRLHPLLPLLIARETLERSVIDGYEIEPKTIVYVNVWAIGRDPAVWEDPEEFLPDRFLDTPIDFK…
AeCYP77A3	Arel.027247	ATGGAATTACTAGACTTAGTTTTACTAACTTTAGCCGCCGTCTTCCTCCGACTATGGTGGCGGTTCTGGTCGGTATCCGATGGCGGACGGAAGAATCTCCCACCGGGTCCACCAGGATGGCCACTTGTGGGCAATTTAGGGCAAGTTATCCTCCAAAAACGGCCCTTCATGTATATAGTACGTGATTTACGTACGAAATATGGTCCCATCTTCACCATGCAAATGGGCCAACGAACCCTAATTATCATTACAAGCTCCGAGCTCATCCATGAAGCCCTAGTTCAAAAAGGCCCAATTTTTGCAAGCCGGCCGCCAGACTCTCCCATCCGGCTCCTCTTCAGCGTGGGGAAATGTGCCATCAACTCGGCGGAATTCGGCCCTCTATGGCGTACTCTCCGC…	MELLDLVLLTLAAVFLRLWWRFWSVSDGGRKNLPPGPPGWPLVGNLGQVILQKRPFMYIVRDLRTKYGPIFTMQMGQRTLIIITSSELIHEALVQKGPIFASRPPDSPIRLLFSVGKCAINSAEFGPLWRTLRRNFVTELINPNRIKQCSWIRKWAVETHLKRLQDEAAQMGFVEVMSNLRLTVCSILICLCFGAKISENRIKNIESILKDVMMMTTPKLPDFLPVLTPLFRRHLKEAKELRKRQMECLVPLVRSRRAFVESGENLNSEMVSPIGAAYIDSLFKLEPAGRGRLSEEELVTLVSEVINAGTDTSATTVEWALLHLVMNQDIQEKLYQEIVDIVGLNGVVTENDVDKMPYLGAIVKETFRRHPPSHFVLSHAAIKDTELGGYTIPANVNVE…
AeCYP736A16	Arel.031592	ATGTCTCCCTTAACGTTTTCCGTATTATTGCCCCTCCTCGGAGCTATCTGGTGGTTCATCCATCTCCAGCGACGAACCGCCAAACCACCACCAAATCTCCACCACAAACTACCACCAGGTCCCCGAGGCTTACCCATTATTGGTAACCTCCACATGTTGGGAAAACTCCCCCATCGCACCCTACACGAATTATCCAAAAAATATGGTCCTATAATGTCCCTACGCCTAGGAAATGTCCCAACAATCGTCGTCTCTTCGCCAGCAGCTGCGGAGCTTTTCCTCAAGACACACGACACTGTTTTCGCTAGCCGGCCTAAAACTCAGGCGGCCAAATACCTAGCTTACGGAACCAAAGGGATTGGTTTTGCCCCGTACGGTCCGTATTGGCGTAATGTTAAG…	MSPLTFSVLLPLLGAIWWFIHLQRRTAKPPPNLHHKLPPGPRGLPIIGNLHMLGKLPHRTLHELSKKYGPIMSLRLGNVPTIVVSSPAAAELFLKTHDTVFASRPKTQAAKYLAYGTKGIGFAPYGPYWRNVKKFCKLELLSSRKIDSYAGMRREELGLLVEELKEAAAAGVVVDVSEKVVQLIEDMTCRMLFGKCRDERFDLSGIIKEITDTVGAFNIADYLPFLGALDLQGLTRRLKRTSKAIDKILEVIIDEHERNANSKHQAFDLDFVDVILSLKNMSASTHDQLSYTMDRTHIKAIILDMIFAAIDTSHTSIGWIMSELIRHPRVMKRLQQELKTIMGDNVMVEESHLPKLEYLDMVIKESLRLHPVVPLLLPHESIEDIMIDGYYVPKKSRVI…
AeCYP736A17	Arel.031156	ATGCATCATTCTGTTGACAAAATCTTGGAGATCATTATTAGTGAGCATGAAGAAGCTGCTAGGACTATACAAAAGGGGCATCTTGAAATGGATTTTGTTGATATATTGCTATCATTAATGAATAATTCCACAAATAGACATGATGAATTATCGCGCATAATTGATCGATCAAGTGTCAAAGGAATCATGGTAGATATGATTGCAGCAGCTATTGATACTTCACATACAGCAATTGAATGGATCATGACAGAACTCATAAGGCACCCAAGAATCATGACAAAACTTCAAGAAGAGATTAAGACTATTGTAGGAAATAATGAAATGGTCGAGGACACGGATTTAACTAAATTCAAATATCTAGATATGGTGATTAAGGAAAGTTTTAGGTTACATCCAACT…	MHHSVDKILEIIISEHEEAARTIQKGHLEMDFVDILLSLMNNSTNRHDELSRIIDRSSVKGIMVDMIAAAIDTSHTAIEWIMTELIRHPRIMTKLQEEIKTIVGNNEMVEDTDLTKFKYLDMVIKESFRLHPTVPLLIPRESMEDIVVNEYHIPKGSRVFINSWALGRDPGVWSENVEEFIPERFIGKSIDFKGHDYELLPFGSGRRVCPGMHLGLINVRQIVAQLVHSFDWELPNGMSVNDLNMDEKFGLTLPRENRLGAVPSLRL
AeCYP716A6	Arel.025000	ATGCGGAATCTGATGCGAAATCTACTGACCGGTGGAGATTCAGCATCTAAGATTCCACCACGAGCTGCAGCAGCAGCTGTTATAGCCCGTGCTATTTCCGCACTGCCTCCACATCAGAGGCATAGTCTGTCATCAAGTTCTGGAGAATTGACTTCGATATATGGAAGCAGGCCTCGTGGTCAAGTAGTGGAGGAACTTGAGGAAGAGTTCTATGAAGAGGAATTTGATCCTGTAAGACATTTTTTGGAGCACATTCCATATGAGGAAATTGAAGTTGCATATTTTGAGGAAAAGGCGGCTCTTAGATTGGCACAACTGGATAAAATATCGGAACGCTTATCCCGCCATGTTATGGAGAATCACGAAGAAATGGTGAAGGGGATGCATTTGGTAAGGGAG…	MRNLMRNLLTGGDSASKIPPRAAAAAVIARAISALPPHQRHSLSSSSGELTSIYGSRPRGQVVEELEEEFYEEEFDPVRHFLEHIPYEEIEVAYFEEKAALRLAQLDKISERLSRHVMENHEEMVKGMHLVRELEKDLKVANVICMNGRRHLNSSRNEVSRDLIVTTNSRRKQALLDMLPVLAELRHALDMQVALEVHVEEGNFCKAFQVLSEYLQVLDSFSELSAIQEMSHGVEVWLGKTLQKLDSLLLGVCQDFKEESYITAVDAYALIGDVSGLAEKMQSFFMQEVLSVTHSVLKNIIQEDMESPDMQSSRFTYSDLCIRIPESKFRQCLLETLAVLFKLMCSYYAIMSFQPENKDSTCQTLKMKQKQDKVRGFSGDVQHVNLVKNSYISQEDDGP…
AeCYP72A17	Arel.015191	ATGATCGCGAGATATGGGAGGACGATGCTCAATCCAGAAAGATTTTCAGAAAGAGTGGCTAAAGCGACAAAGAACCAATTCGCACTTTTCCCATTTGGCGGGGGTCCTCGAATTTGCATTGGACAAAACTTTGCCTTATTAGAAGTGAAAGTAGCCTTGTCAATGATTCTCCAACGCTTCTCATTTAAGCTCTCACCCTCCTATGCCCCATGCTCCTTCTGTTATAATAACAATTCAAAGTTTGGGGCACACTTGATTCTTCGCAAACTAAAAGATTAG	MIARYGRTMLNPERFSERVAKATKNQFALFPFGGGPRICIGQNFALLEVKVALSMILQRFSFKLSPSYAPCSFCYNNNSKFGAHLILRKLKD
AeCYP82C2	Arel.002487	GAGTCACCATACTGCCCAAGTCGTTGGGACGTTTGTGCAGGTACACGCGCGGAGAGTGGATTGGGCGCGCGGACAAAATCAAGCGTTAACATATATCATTTTTACATATTATTGCAGACGCTTTTATTTGGAGCCACAGAAACTGTAACTGTCAGTCTAACATGGACTCTTTCTTTATTACTGACACACCTCAACGCCATGAAAAAGTTCCAAGATGAGCTAGATATTCACGTCGGTAAAAATAGACAGGTGGAAGAATCGGATCTAGCCCATTTAACCTACCTCCAAGCCGTAATCAAAGAAACCATCCGTCTATACCCGGCTGCACCAGTTGGGGTACCTCACGAGGCTATGGAAGATTGCATTGTTGGTGGCTACAATATCCCCGAGGGGACTCGT…	ESPYCPSRWDVCAGTRAESGLGARTKSSVNIYHFYILLQTLLFGATETVTVSLTWTLSLLLTHLNAMKKFQDELDIHVGKNRQVEESDLAHLTYLQAVIKETIRLYPAAPVGVPHEAMEDCIVGGYNIPEGTRLFVNIWKIHHDPEAWPNPYKFRPARFLMSHKDVDVRGQHFDLIPFGSGRRMCPGMSFGLQAVQLTIASLIHGFEFKTTSNEPIDTSVLPPTGTDKCQSYPS
AeCYP734A2	Arel.001135	ATGGAAGAAGATCAGCTGATGATCATGTTATACAGCTGGTGGTTCATCAAAGTGTTTGTTGTGTGTTTTATAGTGCTGGTTTTGTTGCTAAAGATTATGGTTATGCTTTGGTGGAGACCCAGAAAGATTGAAGAACATTTCTGTAAGCAAGGAATCAGAGGCCCCCCTTATCGCTTCTTGATAGGCAATGCAAAGGAAATTGTGAGCCTAATGTTGAAGGCCTCTTCTCAACCCATGCCTTTTCCTTTCTCTCACAATATTCTCCCTAGAGTCCTCTCCTTCTACCACCACTGGAAGAAAATCTATGGTCCAACATTTCTTGTTTGGTTTGGACCGACGGTTCGCCTCACAGTGGCTGATCCAGACCTTATTAGAGAAATATTCACCTCAAAGTCTGAG…	MEEDQLMIMLYSWWFIKVFVVCFIVLVLLLKIMVMLWWRPRKIEEHFCKQGIRGPPYRFLIGNAKEIVSLMLKASSQPMPFPFSHNILPRVLSFYHHWKKIYGPTFLVWFGPTVRLTVADPDLIREIFTSKSEFYEKNEAHPLIKQLEGDGLLSLKGEKWAHHRKIITPTFHMENLKLLIPVAASSVVEMLDKWLAMSNSGDVEIEVSKWYQTLTEDIVTRTAFGPSYEDGKTIFQLQAQQMAFASEAFQKVFIPGYRFLPTKRNIKSWKLEKEIKKSLMRVIDQRRENWDTEMLENGPKDLLGLMIQASMKESVKRKELNSSSSSPITVHDIAEECKSFFFAGEQTTSNLLTWTTVLLAMHPQWQVLARDEVLKVCGPRDIPTKDDVSKLKMLGMILN…
AeCYP736A18	Arel.031154	ATGCATCATTCTGTTGACAAAATCTTGGAGATCATTATTAGTGAGCATGAAGAAGCTGCTAGGACTATACAGAAGGGGCATCTTGAAATGGATTTTGTTGATATATTGCTATCATTAATGAATAATTCCACAAATAGACATGATGAATTATCGCGCATGATTGATCGAGCAAGTATCAAAGGAATCATGCTAGATATGATTGCAGCAGGTATTGATACTTCACATACAACAATTGAATGGATCATGACAGAACTCATAAGGCACCCAAGAATAATGACAAAACTTCAAGAAGAAATTAAGTCTATTGTGGGAAATAATGAAATCGTCGAGGACACGGATTTAACTAAATTCAAATATCTGGATATGGTGATTAAGGAAAGCTTTAGGTTACACCCAACT…	MHHSVDKILEIIISEHEEAARTIQKGHLEMDFVDILLSLMNNSTNRHDELSRMIDRASIKGIMLDMIAAGIDTSHTTIEWIMTELIRHPRIMTKLQEEIKSIVGNNEIVEDTDLTKFKYLDMVIKESFRLHPTAPLLIPRESMEDIVVNGYHIPKRSRVFINSWALGRDPGFWSDNVEEFIPERFIGKSIDFKGHDYGFLPFGSGRRVCPGMHLGLINVRQIVAQLVHSFDWELPNGMSVNDLNMGEKFGLTLPRENHLGAVPSFRL
AeCYP98A1	Arel.001583	ATGTTCCCCCAACTACCACTTCAAGATCAACAAGAACAACGAAGCACCTCACTTTTTTGTACATCTTCTTCTTCTTCTTACATGGCCTTGCTTCTATTTGCCGCCTCTCTCTTAATCCTTATAATCTTTCTCCACAAACTATATCAACGGTTGAGATTCAAGCTCCCACCGGGCCCCCGACCGTTGCCGATAGTCGGAAACCTCTACGATATCAAGCCCCTCAAGTTCCGGTGCTTTGCCGAATGGGCTCAAGTCTATGGCCCAATCTTTTCCCTGCATCTGGATTCTCGGTTGAACGTCGTCGTTACAACCGCGGATTTGGCAAAAGAAGTGCTTAAAGAAAATGACCAGCACTTGGCAGATAGGCATAGAAATAAAGCAACTGATATATTTAGTAGG…	MFPQLPLQDQQEQRSTSLFCTSSSSSYMALLLFAASLLILIIFLHKLYQRLRFKLPPGPRPLPIVGNLYDIKPLKFRCFAEWAQVYGPIFSLHLDSRLNVVVTTADLAKEVLKENDQHLADRHRNKATDIFSRGGQDLIWADYGPHYVKVRKVCNLELFTPKRLEALRPIREDEVTAMVESIFKDCTTTSDKAGKSLVLRPYLGSVAFNNITRLSFGKRFVTPDGGMDDQGQEFKGIVSNGIKIGAKVFIGEYVPWLRWMFAGENDVLNQHETRRARLTRQIMEEHTLARKKTGGAKDHFVDALLTLQKQYDLTDDTVITLLWDMITAGMDTTSISVEWAMAELVKNPRVQRKAQEELDRVIGSTRVMSETDFSNLPYLQCVAKEALRLHPPTPMMLPH…
AeCYP93A2	Arel.012396	ATGGCCGTGACTGCCATGGATAAGTACTTTTGCTGCTTCCTTTTGATTTACTTTGTTTCAGCTCTCCTATTTCAATTCTTCACCAAGAACCGCCGCCGGCGAGTCCAACTCCGCCCCCCACCAAGCCCACCAGCACTACCTATAATTGGCCATCTCCCTTTACTAATAAGCCGTACTGATCCCTTGCACAAGTCCTTACAAACTCTAGCTTTTCGATGTGCCCCATTCATGAAAATCTCTATAGGGACATCCAAATGGTTGGTTGTATCCAACACATCCGTTGCCAAACAAGTTTTGGACAATACCCACGACCCAAATTTCGCCTTAATTAAGCCAAACTCCCATGATTACCTTATGTTATATGACGTAGATTTGAGAAAGCTGTATGAAACAGAACTT…	MAVTAMDKYFCCFLLIYFVSALLFQFFTKNRRRRVQLRPPPSPPALPIIGHLPLLISRTDPLHKSLQTLAFRCAPFMKISIGTSKWLVVSNTSVAKQVLDNTHDPNFALIKPNSHDYLMLYDVDLRKLYETELVSGLQFHHFADIQKQEMLKLLKILVKCSKEGEACDLGLELVKLTNSIICQMTMSIGSGSNGSKRIREVVNGINVEIGVKSGFRALLGRLGQLGLFGYGRRMKALVLQFDELVEEIMVEHEEGRRYGGHERLIREQDLMDILLDIHEDQAAEVKLTRNDIKGLLLEIFMSGSEPSSVALKWTLAEIINHPNVLNKLREEIIGVVGLHRLVEHSDVPKLPYLQAVVKESLRLHPPSPLILRKCKEDCKINGYDVISNSRIMINTYAIM…
AeCYP76B2	Arel.007138	ATGGATATCTTGACCATGCTATTCTCTCTATTGTTTGCGTTTACCATTTTCATGGCTCTCATTTCGCTAGCCAGATCAGGAACCAAAGCCAAGAAACTTCCACCGGGACCGGTTCCCTTACCGGTCATCGGCAACTTACACAAACTCGGCGACCACCCCCACAAGTCCCTGTCGGCCCTAGCCAAAATATACGGCCCAATCATGCATCTAAAATTGGGCCGTATAAGTACAGTAGTCATATCTTCATCAGACACAGCCAAACAAGTCCTCCAAAAGCAAGATCTGGCTTTCTCTACCCGATTCGTGCCCGACGCTATTCACGCCAACAACCACTTGGAATACTCCGTTGTTTGGTTACCAGTTGCCAGCCGGTGGAGAAGTCTGAGAAAAATAATGAAT…	MDILTMLFSLLFAFTIFMALISLARSGTKAKKLPPGPVPLPVIGNLHKLGDHPHKSLSALAKIYGPIMHLKLGRISTVVISSSDTAKQVLQKQDLAFSTRFVPDAIHANNHLEYSVVWLPVASRWRSLRKIMNSNLFSGNKLDANQHLRSKKVHELIGYCRKCSQTGEAVDMGQAVFRTSLNLLSNTIFSKDLTDPYEDTGKEFKDLVWNIMVEAGKPNLVDFFPVLKKIDPQGIRRRMTLHSGKVLEMFSDLISERLELRKLGKSVGNGDVIDELLNISEENSDEIDRTHIEHMFLDLFLAGTDTTSSTVEWAMAELLKNPEAMVKAKAELNQVIGKGKMVEEADVSRLPYLRSIVKETLRIHPPAPFLVPRKVEEETEVCGYTIPKGSQILVNAWAI…
AeCYP736A19	Arel.031146	ATGACTCTCCGATCAAAGTTGACTCGACGTTTCAAGGCACTGCACAAAGATCTTGACAAAACCTTGGAGAAGATTGTTAATGAGCATGAAGAAGCTGCTACTAGTGGAAGTAAAAAGCTTGACCTGGATTTCGTCGATGTACTACTATCATTATTGGATAAATCTTCAGAAAATACTTATGCTGAGCTATCACACATGCTAGATAGAAGAACCCTAAAAGGAATTATAGTAGATATGATAGCAGCCGGTATTGATACTTCACACACTGCAATTGAATGGATCATAACTGAACTCATAAGACATCCGAGGATCATGAAACAACTTCAAGAAGAAATTAAGAGTGTTGTTGGAGTTAATGAGATTATAGAGGAGACTGATTTGACTAAGTTTAAGTACCTA…	MTLRSKLTRRFKALHKDLDKTLEKIVNEHEEAATSGSKKLDLDFVDVLLSLLDKSSENTYAELSHMLDRRTLKGIIVDMIAAGIDTSHTAIEWIITELIRHPRIMKQLQEEIKSVVGVNEIIEETDLTKFKYLDMVIKETFRLHPVGPLLVPRESMEDIVIDGYYIPKKSRVLINSWTLGRDPDLWSENVEEFIPERFIAGVDFFGHDYKFLPFGSGRRICPGMHLGLINVRQIVAQLVHCFDWELPNGMSLSDLNMDEKFGLTLPRAQHLLAMPVRRL
AeCYP71D11	Arel.033438	ATGGCCGATTTGTTTCCTAAATTGAAATTCCTTGAATACATCACTGGAATGAGGCCTAAGTTGGAGGACATGAGGCGGAAGCTTGACCATATCTTTGGTCATATCATCAATGAGCATAGAGAAAAGTTGGCGAGCAGAAATGAACAAAATATACACGATACAGATGAAGATTTAATTGACGTTCTTTTGAGAATTAATGAGAGTCAACGCCTCGAGTTTCCCATCACATCAAATGACATCCAAGGCATCACTTTGGATATGTTCACGGCTGGAACTGATAGTACTTCAGCTACACTTCAATGGATAATGTCGGAGTTGATGAGAAATCCTAGAGTGATGGAGAAGGCACAAGCGGAAGTGAGACAAGCCCTCAAGGGAAAGACAATAATATATGAAGCA…	MADLFPKLKFLEYITGMRPKLEDMRRKLDHIFGHIINEHREKLASRNEQNIHDTDEDLIDVLLRINESQRLEFPITSNDIQGITLDMFTAGTDSTSATLQWIMSELMRNPRVMEKAQAEVRQALKGKTIIYEADIQGLSYLKLVVKETLRLHAPVPLLVPRECRKQCEIDGYTIPVGTKVIVNAWAIARDPEHWVDAGSFIPERFENGSMDYIGTNFEYIPFGAGRRICAGIAFAAATIELPLAQLLYYFDWKLPNDMKPEDVDMEESNGATATRKNNLILIPTLHPPSLELK
AeCYP72A18	Arel.012505	ATGCAAAATCTCTCTTGCCCTCTTTCTCCAACTCTGATGGAGTTAATCTACAAATCTGCTGCAGTCTCTTGTGGAATTGTTGTTGTGATATTAGCATGGAGAGTCTTGAATTGGGTGTGGTTCAGACCAAGGAAGCTAGAAAAGTACCTGCGGCAGCAAGGCTTCGATGGAAATTCGTATAGGCTATTTTTTGGAGATGGAAAAGAGATGGCCATGATCATCAAAGAAGCCAAGTACAAACCCATCAATCTCTCTGATGATGTCGTCCCTCGGATCGTGCCCGTTGTCCATAAAACCATCCAAAACTATGGTTTTGAGGTTGATGCAATTGACAATGATAAAATTGTGAGCACTTTGGAAGAGGTGAAAGAGAGGGGGAGGGGGGTGGCTGCTAATGCA…	MQNLSCPLSPTLMELIYKSAAVSCGIVVVILAWRVLNWVWFRPRKLEKYLRQQGFDGNSYRLFFGDGKEMAMIIKEAKYKPINLSDDVVPRIVPVVHKTIQNYGFEVDAIDNDKIVSTLEEVKERGRGVAANANLLKFNIGYQANDPRFVLLKSMLPAFYLSCSEIMSKWEKLVSTKGQCELDVQPYLETLSSDAISRTAFGSSYEKGRRIFQLQKEQAELVVQFAQSIYLPGMRFLPTKRNKRMKEIAKEVKAALRIMIHKRLNAVEAGETNPDDLLGILLDSNSNEIKHGNKNSGMSIDEVIEECKLFYFVGQQTTANLLVWTMILLSHYQDWQHRARVEVLQAFGYEKPDIDGLNHLKIVNMILLEVLRLYPPGPLLYRTMEEYTPITQSLQLTDQ…
AeCYP86B2	Arel.013543	ATGGACATAAACTGGTTGTATGATTACTTACATTTTTCTGACATAGCCATTGCATTGTTAAGTCTCTTCATCATTAGCTCTATACTTGAGAGAGTCACTAGAAAGGGTCCTATGTTATGGCCAGTAGCCGGAATCGGTCCTTCCGTAATTCTTCACTTCGCCCATCTCTACGATTGGATCACCGGATCTTTGATTCAATCCGGTGGAACATTTCACTACAGAGGAATTTGGAAGAGTGGAGCCTTTGGTATCGTAACCGCTGACCCTTCCAAAATAGAATACATGCTCAAGACAAAATTCAACAACTTCCCTAAAGGGAAATATTATAGGGAAAGGTTCTACGAATTACTTGGGGACGGAATTTTCAATGCTGATGATGATTTGTGGAAGCAACAAAGG…	MDINWLYDYLHFSDIAIALLSLFIISSILERVTRKGPMLWPVAGIGPSVILHFAHLYDWITGSLIQSGGTFHYRGIWKSGAFGIVTADPSKIEYMLKTKFNNFPKGKYYRERFYELLGDGIFNADDDLWKQQRRAATSEMHSNRFLDYSLQTIQDLVHNKLLKLMENVVDKSNRSITCIDLQEVLLRFTFDNICIAAFGVDPGCLSLDLPDVPFAKAFEEATELSLFRFLLPPIVWKSMRYLGLGFEKRLKEAAKVVHEFAEKTVRQRKGELGHQCWDFNDRSDLLSRLISVENAYFSNNLLKDFCISFILAGRDTSSVGLAWFFWLVHKNPHVENKILLEIYEILKTNKKEADYNDVVFTVEELKKMVYLQAALSESLRLYPPVSIDFKQVLEDDVFP…
AeCYP716A7	Arel.032562	ATGATGAACTACTTTTATTCCCTCTATACTCCAACTTCAATATCCTCCTCCTCCTTGTTGATCATTAGCCTGATCATCTCTTCCATTGTAATTGTCATGATCATCAGTTATTCTAGTAATTATTATAAGTACAACAAAACCACCCATAAATCTCCTCTTCTTAATCTTCCTCCGGGAAGCTACGGCTGGCCGGTCATCGGAGAAACTCTGTCACTTCTCCGGGCGGGGTGGGACGGAAAGCCGGAGAGATTCATAAGAGAGAGGGTGGAGAAACACGGCGGCGCTCCGGTGTTCAAGACATCACTGCTGGGGGACTCCATGGTGGTGTTTTGTGGGATAGGAGGGAACAAGTTCCTGTTTGGGAACGAGAATAAGCTGGTGGCTGTTTGGTGGCCCAGG…	MMNYFYSLYTPTSISSSSLLIISLIISSIVIVMIISYSSNYYKYNKTTHKSPLLNLPPGSYGWPVIGETLSLLRAGWDGKPERFIRERVEKHGGAPVFKTSLLGDSMVVFCGIGGNKFLFGNENKLVAVWWPRSVKKLFGSCLINATGEEAKWMRKILHSFLSPDAFSRLYINTMDVVTQKHIDTHWQGKREVKVYQAAKLYTFELACRLFMSLKDPKHIEKLGSQFNIFLKGIVQIPFNVPGTRFYSAMRAATAIRKDLLIITRQRRVALDQKTASPSQDLLSHLLVSSDENGRFLTEAEIVNNIMTLLFAGHDTSSVSITLLMKTLAELPQVYEKVFREHMDIAESKGPGELLQWDDIQKMRYSWNVVCESLRICPPVTGAFREALVDFTYAGYTIP…
AeCYP736A20	Arel.031180	ATGAGAAGGGAGGAGGTTGGGTTGTTGGTGGAGGAGCTTAAGGAGGCTGCCGCTGCAGGTGTGGTGGTGGATGTTAGTGCCAAGGCCTTGACTTTGGCTGGAAAATTCAATCTTGCAGACTTTGTGCCATTCCTAGCCCCACTTGACCTTCAGGGATTGACCCGTTGTTTCAAAGATACAAGCAAGAGACTTGACAGAATCTTGGAGATCATTATCGACGACCATGAACAAAATGCAAGCAGTGGAAATCCAAGGCAAAATAGAGACTTTATCGATGAAATGTTATTGTTAAAAAATAAGCCCTCAAATACTCACAATGAGCTTGCAAAAGTAATTGATAGACCAACTATTAAAGCCATCATGATTGACATAATCTCGGCAGCAATCGATACTTCACAT…	MRREEVGLLVEELKEAAAAGVVVDVSAKALTLAGKFNLADFVPFLAPLDLQGLTRCFKDTSKRLDRILEIIIDDHEQNASSGNPRQNRDFIDEMLLLKNKPSNTHNELAKVIDRPTIKAIMIDIISAAIDTSHTSIEWILTELIRHPRVMKKCQDEINAIVGVDRMVEETDLPKLEYLYMVVKEGLRLHPVAPLLGPHESMEDIVVNGYHIPKKSRIIVNSWALGRDPNVWSENVEDFFPERFDGSNVDLRGLDFQLLPFGSGRRGCPGMQLGLINIQFVLAQLVHCFDWQLPTGTSPSELDMTEKFGLTIPRVKHLLAMPKFRL
AeCYP736A21	Arel.031188	ATGAGAAGGGAGGAGGTAGGGTTGTTGGTGGAGGAGCTTAAGGAGGCTGCCGCCGCTGGTGTGGTGGTGGATGTTAGTGCCAAGGTGGCGGATTTGATTGAGAACATGACTTATAGGTTGCTTTTGGGACGCAGCAAAGATGATAGATTTGATCTCAAGGGTATTATGAATGAGGCTTTGACTTTGGCTGGAAAATTCAATCTTGCAGACTTTGTGCCATTTCTAGCCCCACTTGACCTTCAGGGATTGACCCGTTGTTTCAAAGATACAAGCAAGAGACTTGACAGAATCTTGGAGATCATTATCGACGACCATGAACAAAATGCAAGCAGTGGAAATCCAAGGCAAAATAGAGACTTTATCGATGAAATGTTATTGTTAAAAAATAAGCCCTCAAAT…	MRREEVGLLVEELKEAAAAGVVVDVSAKVADLIENMTYRLLLGRSKDDRFDLKGIMNEALTLAGKFNLADFVPFLAPLDLQGLTRCFKDTSKRLDRILEIIIDDHEQNASSGNPRQNRDFIDEMLLLKNKPSNTHNELAKVIDRPTIKAIMIDIISAAIDTSHTSIEWILTELIRHPRVMKKCQDEINAIVGVDRMVEETDLPKLEYLYMVVKEGLRLHPVAPLLGPHESMEDIVIDGYHIPKKSRIIVNSWALGRDPNVWSENVEDFFPERFDGSNVDLRGLDFQLLPFGSGRRGCPGMQLGLINIQFVLAQLVHCFDWQLPTGTSPSELDMTEKFGLTIPRVKHLLAMPKFRL
AeCYP714C7	Arel.016929	ATGTTTCTAAGCAACCATCGAAACGAACGCTTTAGGATGAACAGAGTCATCTTGCAACAGCAACATGGAATGCAACAAATCACTGAATGTTTAGGAGAAAGTCAAAAGTTTATATGCAGAGGGACTGAGACAGGGATTGAGCTAGATAGCAATGATGATAAGGATAACTTCTGGAAACAGGATGGATCATTTGCACAATATAGGGTTTGGCATAACAAATTGACCCCAGCTGCATTTGAGAAGCATTTTGGAAGAGAAACGGCCAGAAAGTGGAATAATAATATATGGGTCATAGCTAATGGGGAGAAGCTTCCTGTGGCAAAGACATCACAAGAAGTAAAGCTTCGCTTAATAATAATGTTGAATATGCTGATGACGATTGGTTTGGTTGGGTTACTG…	MFLSNHRNERFRMNRVILQQQHGMQQITECLGESQKFICRGTETGIELDSNDDKDNFWKQDGSFAQYRVWHNKLTPAAFEKHFGRETARKWNNNIWVIANGEKLPVAKTSQEVKLRLIIMLNMLMTIGLVGLLGFFVRLYRAIIWEPKRLRSLMKQQGINGPPPKFLLGNLLEIKKSKAARKAPTHERSSVLSHNCSAFLFPIFEEWRKQYGPIYVLSLGTVNVVYVHKPDVVKEITTHTSLDLGKPSYQQREHGPLLGQGILTSNGAAWSHQRKILAPELYMEKVKGMLNIVIESALTLVNSWNSRVDVEGGVVDINIDEYLPTKNNRESWALQNEVHRLILKVVKERKEAGYEKDLLQIVLESAEKSDLSQEEMDRFIVDNCKNIYLAGYETTAVSS…
AeCYP92C1	Arel.008055	ATGGAAGCTCCAACTTGGGCTGCATATGCCGCAACATGGCTAGCAACTCTTTCTCTCTTCCTCCTCTCAAGATATTTCCATCGCTGCCAAAAGTACAGAAACCTTAACCCAGCACCAGGCCCAAAACCATGGCCTATTATAGGGAACCTTAACCTTATTGGTTCCCTCCCTCATCGTTCCGTCCACGAACTGTCCCAAAAATACGGTCCCATAATGCAACTCCAATTCGGCTCCTTCCCAGTAGTTGTGGCCTCCTCGGTGGAAATGGCCAAAACCTTCCTGAAAACCATGGACGTCACTTTTAGCGGCCGGCCCAAAACCGCCGCCGGCAAATACACAACATACAACTATTCCGACATCACGTGGTCCCCTTACGGCCCATACTGGCGCCAAGCAAGG…	MEAPTWAAYAATWLATLSLFLLSRYFHRCQKYRNLNPAPGPKPWPIIGNLNLIGSLPHRSVHELSQKYGPIMQLQFGSFPVVVASSVEMAKTFLKTMDVTFSGRPKTAAGKYTTYNYSDITWSPYGPYWRQARKMCATELFSAKRLESYEYIRVEEMKSLLTELYTVSGKNVTVKDHLATVSLNVISRMVLGKKYLDDDNGNGIVTSEEFKKMIFELFLLNGVLNIGDSIPWIDFLDLQGYVKRMKIVSKKFDRFLEHVLDEHNARREKEGVNYVAKDMVDVLLQLADDPNLEVKLERHGVKAFTQDLLAGGTESSAVTVEWAISELLKKPELFEKATEEMDRVIGRKRWVEEKDIQNLPYIQAIVKETMRLHPVAPMLAPREAREDCKVAGYDVVKGT…
AeCYP96A3	Arel.029979	ATGACACCGGGACTCCTTCGGAATGCTCATCGTATACACGAATTCGCCACCGATGTTCTAAAAGAGAGCCAAGGAACATTTGAGTTCAAAGGTCCTTTGTTAGCAAACTTGGACTTGTTTGTCACTGCAGACCCGGCCAATGTCCACTACATCTTGAGCAAGAACTTTTCAAATTACCCGAAAGGCCCCGAATTCAGAAAGATTTTTGATATTCTTGGCGACGGGATTTTTAATGCTGATTTTGGATTATGGGAGCTGCACAGAAGAACCACTATGTCACTCTTCAATCATGCCAAGTTCCTAAACATGTTGCAAAAAAATATTCGGAACAAAGTCGAAAAAGGGCTAATTCCGGTTCTCGACTTTGTTTCAAGAAAAGGGATTGTGGTTGATTTGCAA…	MTPGLLRNAHRIHEFATDVLKESQGTFEFKGPLLANLDLFVTADPANVHYILSKNFSNYPKGPEFRKIFDILGDGIFNADFGLWELHRRTTMSLFNHAKFLNMLQKNIRNKVEKGLIPVLDFVSRKGIVVDLQEIFQRLTFDGVCSMVLDHDPCSLSIDLPYIPCEKAFTIAEEALLYRHIVPESVWKLQSWIGIGKEKSLSKAWDAFDQFIYKCLTTKHDSNVSELEASESTAAEEELSLLTAYSKAYKEKTGNPKKFLRDTLLNLMIAGRDTTATALTWFFWLLSKNPLVEMKIQEEIKAILNLKEGENWRFFSIEELRKMVYLHGALCEALRLFPPVALEHKAPVEPDVLPSGHPVDKNTKIVLSFYSMGRMESVWGKDCLEFKPERWISERGGIK…
AeCYP71AU1	Arel.003895	ATGCGTAAATTGTGCACCATAGAGTTGCTAAGCAACCTTAAAATCAATTCATTTCAAGCTATGAGAAAGGAAGAGCTTGGCCTTTTGGTAAATCATATTGAACAGGCAGCTAGGGAACATGCTGATGTTGATCTTACTGCCAAGGTTTCGTCCATGAGTGCGGATATGAGTTGCCTGATGGTTTTTGGGAAGAAGTTTGAGGATAAGGAATTTGATGAAAGAGGATTCAAAGCTGTGATTCGAGAGGGGATGCAGTTAGCAGTGTCCTTCAATTTGGGTGATTATTTTCCTTATCTCGGTGTGCTTGATCTTCAGGGAATGACTAAGAAATTGAAGGATATGGCAAAGCTATATGATGTTTTTTTAGAAAAGATTCTAAATGAGCATGCACAACCAAAG…	MRKLCTIELLSNLKINSFQAMRKEELGLLVNHIEQAAREHADVDLTAKVSSMSADMSCLMVFGKKFEDKEFDERGFKAVIREGMQLAVSFNLGDYFPYLGVLDLQGMTKKLKDMAKLYDVFLEKILNEHAQPKDGGQTKDLVDTMLAIMASGEAEFEFDRSHVKATVLDIFAAAMDTSSTAIDWILSELLRNPRVMKKVQEELEQVVGMDRMVEESDLESLKYLDMVIKEAFRLHPVAPLLLPHECIEDCTIDGFFIPKKSRVVVNVWAIGRDPKVWTDVETFLPERFVGNHIDYRGRDFELIPFGSGRRGCPGMQLGITVVRLVVAQLVHCFDWELPNGMQPSELDMTEEFGLVTARAKHLMAIPTCRLHQN
AeCYP720B1	Arel.031774	ATGGAAAGGTGGAAAATGGGAGAGATATTTTCAAGTGCTTGGCTTTTCATGATCCCAACACTTTTGTTCATCATTTTCCTTGCAAAATTTGTGCATGAAAATAGAAAGAAAGTGGGAAAAAGCAACCAGAAATTTCCTCCTGGTGGAAGAGGGTGGCCAATAATAGGAGATAGTGTCAATTGGTATAATGCTGTTGCAAGTTCTCATCCCCCAAGTTTTGTTGAAGAGCAAATTAAAAGGTATGGGAAGATATTTTCGTGCAGTCTATTTGGTAAATGGGCTGTTGTGTCAGCTGACCCGAGCTTTAACCGATTCATAATGCAAAATGAAGGGAAACTTTTCGGGTCAAGTTATCCGAAATCTTTCAGGAACTTAGTTGGAATAAATGGAGTGATTAAT…	MERWKMGEIFSSAWLFMIPTLLFIIFLAKFVHENRKKVGKSNQKFPPGGRGWPIIGDSVNWYNAVASSHPPSFVEEQIKRYGKIFSCSLFGKWAVVSADPSFNRFIMQNEGKLFGSSYPKSFRNLVGINGVINAQGEHQRKLHSIASNMMRLDKLNFHFMKDIQMVMVQTLTKFSNNQVILLQDVCRKARENIISKINKIIKQHRERGPSDVEVNNGLLGRLVDEESLPADSMADFVINLLFAGNETTAKTMLFAVIDETLRLGGIAIWLMREAKENIEYQDYVIPKGCFVVPFLSAVHLDENIYEESIKFNPWRWMEPQNLEKRNWRNSQFYSPFGGGPRFCPGAELARLQIALFLHYFVTTYRWTQMKEDRMSFFPSARLVNGFPIQLTRQDV
AeCYP81Q4	Arel.002494	ATGCTCTCTGGCATCCGCATTGATGAGGTTCGAACACTGATTAACCAGCTCAATAAAGCCTCAGCAGAAGATCCAGACCGGCCTGTGGAGCTGAAGTCCGCGTTCTTCGAGCTCACGTTCAACATCATGATGAGGATGATTGCTGGGAAGAAATACTATGGCAAGGACGTGACAAGTACTGAAGAAGTTAAAAGGTTTCAAGATATGGTGAATGAGACAGCGCGATTAAGAACCGCGTCTAATGTGGGAGATTTCTTGCCATTTATGCGGTGGCTTGGATTTAAAGGAATAGAGAAGAAGATGATGACAATGCATGAGAAGAGAGATAAGTTTATGCAAGATCTAATAGATGAGCATCGGAGAATGAGGTTCAATCCTTCTTCAGACGGGAGGAAGAAA…	MLSGIRIDEVRTLINQLNKASAEDPDRPVELKSAFFELTFNIMMRMIAGKKYYGKDVTSTEEVKRFQDMVNETARLRTASNVGDFLPFMRWLGFKGIEKKMMTMHEKRDKFMQDLIDEHRRMRFNPSSDGRKKTMIEILLSLHESDPEYYTDETIKSLMLVLLHAGTDTSVGTMEWAMSRLLNNPEILKKAQTEIDNRVGQDQLINESDLGELSYLRRIINETLRIHPVTPLLVPHESSEECRVGGYRIPSRTMLFVNLWGIQNDPKIWEDPGKFKPERFEGIEGTRDGFKLMPFGSGRRGCPGESLAMRMVGLVLGSLIQCFDWERVGKDMEDMTEGTGVTVSKARPLLAKCRLRPSIASLVSEN
AeCYP714A1	Arel.011479	ATGAAAGTCCCTGTTCTCTCTCTCTCTCTTCTTCCTCTTCTTTTTCTTCCTTTTCTTCTTCTTCTTTCTTCTAATCTTTTTGTTTTGAAAACCTTTTCTTCATGGGCTCTTGTTGTTGCTGTTTGTTTGTCTGTATATCTGTCCAACATTCTATGGCTAAAACCACAAAGGCTTCGATGGAAGCTTCAAAGGCAAGGCATCAACGGGCCTCGCCCTTCTTTTCTATATGGGAATGTCCCTGAGATGCAGAGGATTCAATCCGCCACCAAGTCCTCTTCTTCTCCTGACTTCATAGCCCATGATTACACTTTTACCCTCTTCCCTTATTTTGAACAATGGAGAAAACAGTACGGCCAAATATATACATATTCAACAGGGAACAAGCAACATTTGTACGTG…	MKVPVLSLSLLPLLFLPFLLLLSSNLFVLKTFSSWALVVAVCLSVYLSNILWLKPQRLRWKLQRQGINGPRPSFLYGNVPEMQRIQSATKSSSSPDFIAHDYTFTLFPYFEQWRKQYGQIYTYSTGNKQHLYVNHPELVKEMNQCITFGLGKPSYITKRLAPLLGNGILRSNGHFWAQQRKIVAPEFFMDKVKGMMGLMVESAQPLVRKWEACIEAQGGSMAEIRVEEDLRSVSADVISRACFGSSYFKGKQIFSKLRTLQQAISIGSLLFGLPSFGFLATRQQKEIRGLEKEVESLIWEAVKERERECLEASSLSEKDLLQMILEEAINDVYVGKESSKQFIVDNCKNIYFAGHESTATAASWCLMLLALHPEWQARIREETLEICQNCTLDSDSLPK…
AeCYP736A22	Arel.021405	ATGAGAAAGGAGGAGCTTGGGTTATTGGTGAAGGAGCTTAAGGATGCCGCCGCTAAATGTGAGGTGGTGGATATTAGTGCAAAGGTAGCTGATCTTATTGAGAACATGACTTATAGGTTGCTTTTGGGACATAGCAAAGATGATAGGTTTGATCTCAAGGGTATTATGAATGAGGCCTTCCTGTTGGCTGGAAAGTTCAATCTTGCAGATTTTGTGCCTTTCCTAGCCCCACTTGACCTTCAGGGATTGACTCGAAGCTTTAAGGAAGCCGGCAAGAAACTTGACAAAATGTTGGAGCTAATTATTGATGAGCATGAACAAAACGCAAGTAATGGACTTCAAAAGAAAAATACCGACTTTGTTGATGAAATGCTATCATTGATGAAAAATTCCACAAGC…	MRKEELGLLVKELKDAAAKCEVVDISAKVADLIENMTYRLLLGHSKDDRFDLKGIMNEAFLLAGKFNLADFVPFLAPLDLQGLTRSFKEAGKKLDKMLELIIDEHEQNASNGLQKKNTDFVDEMLSLMKNSTSTHHELAKAIDRSSIKSIMVDIITAAIDTSYTSIEWILAELIRHPRVMKKCQEEVNTIVGLDRMVEETDLPKLEYLYMVVKEGLRLHPIAPLLGPHESREDIVIDGYYIPKKSRVIVNAWALGRDPNVWSEDVEEFLPERFTRSKIDLRGRDFQLLPFGSGRRGCPGMQLGLINIQFVLAQLLHCFDWELPSGILTGDLDMTEKSGLTIPRIQHLLLVPKVRI
AeCYP71D12	Arel.032711	ATGGAGTTTCAGCCCCCTTTGGCTATCATCACTTCCTTCATCCTCCTCTTCCTCTTTCTAGTCAAGTTATTCAAAAGATCCAAACCCGAGAAACTGCCCCCCGGACCACTAAAACTACCTTTCATAGGAAATTTGCTTCAAGTGGCCCGTGCAAATCCGATACCACACCATGGCCTCCTCGAGTTGGCCACAAAATATGGACCTTTAATGCATCTACAGCTCGGTAACATTCCAGCTATAGTGGTATCATCGCCACGAGTGGCGAAAGAGGTACTAAGAACACATGACCTTGCATGTGCAGATAAGCCAGATATGTTACTAGGCAGAATTATGTTAAAGAATAGTAGGGATATTGTTTTGGCCCCCTATGGTGATTACTGGAGGCAAATGCGCAAAATT…	MEFQPPLAIITSFILLFLFLVKLFKRSKPEKLPPGPLKLPFIGNLLQVARANPIPHHGLLELATKYGPLMHLQLGNIPAIVVSSPRVAKEVLRTHDLACADKPDMLLGRIMLKNSRDIVLAPYGDYWRQMRKISTTELLSANKVRSFYNIREEESWQLIESVRSSLGSPFNFSIKVTAMANSVICRATIGKKCKYQEELIELVEDITYRGSGFFMADLFPSLKFLEYVNGMRPTLEKMRRKLDHIFSNIIDDHKEKLARRKEQNVSDVDAKDEDLIDVLLRINEGQQLEFPITSNDIQGTTLDMFTAGTDSTSATLQWIMSELMRNPRVMEKAQAEVRHAFKGKTIIHEANIEGLSYLKLVIKETLRLHAPVPLLVPRECRKKCEIDGYTIPVGTKVIV…
AeCYP736A23	Arel.022080	ATGAGAAAGGAGGAGCTTGGGTTATTGGTGAAGGAGCTTAAGGATGCCGCCGCTAAATGTGAGGTGGTGGATATTAGTGCAAAGGTGGCTGATCTTATTGAGAACATGACTTATAGGTTGCTTTTGGGACGTAGCAAAGATGATAGGTTTGATCTAAAGGGTATTATGAATGAAGCCTTCCTGTTGGCTGGAAAGTTCAATCTTGCAGATTTTGTGCCTTTCCTAGCCCCACTTGACCTTCAGGGATTGACTCGAAGCTTTAAGGAAGCCGGCAAGAAACTTGACAAAATGTTGGAGCTAATTATTGATGAGCATGAACAAAACGCAAGTAATGGACTTCAAAAGAAAAATACCGACTTTGTCGATGAAATGCTATCATTGATGAAAAATTCCACAAGC…	MRKEELGLLVKELKDAAAKCEVVDISAKVADLIENMTYRLLLGRSKDDRFDLKGIMNEAFLLAGKFNLADFVPFLAPLDLQGLTRSFKEAGKKLDKMLELIIDEHEQNASNGLQKKNTDFVDEMLSLMKNSTSTHHELAKAIDRSSIKSIMVDIITAAIDTSYTSIEWILAELIRHPRVMKKCQEEVNTIVGLDRMVEETDLPKLEYLYMVVKEGLRLHPIAPLLGPHESREDIVIDRYYIPKKSRVIVNAWALGRDPNVWSEDVEEFLPERFTRSKIDLRGRDFQLLPFGSGRRGCPGMQLGLINIQFVLAQLLHCFDWELPSGISTGDLDMTEKSGLTIPRIQHLLLVPKVRI
AeCYP78A5	Arel.006428	ATGGATTTGGGTATGGTTTCAAAGGATACAAACTGGTGGATTTTCACTCTACCAGCATTTCTCGGATCTAATAACCTTCTAGATTCTTACGTTTTATTCTCTATCTTCACGACCTTCATTTCCCTCACACTTCTCGCATGGGCCTTTTCCACCGGCGGCGGCGTTGCGTGGAAAAATGGCCGCAACCAAAACGGCACCGTTCCTATCCCCGGACCTCGAGGCCTCCCTATATTCGGAAGCCTCTTCACTCTCAGCCGCGGCTTGGCTCATCGCTCCCTCGCTTCCATGGCATGGTCCCGAGCCGGAGCCGCCACCCAGCTCATGGCCTTCAGCCTCTGCTCAACCCCACTTGTCGTAGCTTCCGATCCCCATATAGCCAGGGAGATTCTCACTTCCCCT…	MDLGMVSKDTNWWIFTLPAFLGSNNLLDSYVLFSIFTTFISLTLLAWAFSTGGGVAWKNGRNQNGTVPIPGPRGLPIFGSLFTLSRGLAHRSLASMAWSRAGAATQLMAFSLCSTPLVVASDPHIAREILTSPHFADRPIKQSAKTLMFSRAIGFAPNGAYWRQLRRIASSHLFAPRRIAAHEAGRQLDCAAMLRNIATEQSRHGVVTLRKHLQAAALNNIMGSVFGKRYDPAHDNEEVKELREMVTEGFELLGAFNWSDYLPLLNYLYDPFRIVQRCKALVPRVRKLVRAIIQEHKLSESSKDSDNADFVHVLLSLEGDEKLHEDDMVAVLWEMIFRGTDTTALLTEWVMAELVLHQDIQAKLQEELDGAVSNRNVTDADVAKLPYLQAVVKETLRVH…
AeCYP80B1	Arel.017003	ATGAATCTAACAACAAAAGATTTAGGAGATATGAATACTTTGTTCCTTGCCATACTACTACTATCCCTCGTCTCTTTGATCATTTTCAAATATACTTCCAAAGCCAAAACACTACCACTTCCACCAGGCCCATATGCATGGCCACTAGTAGGCAACATCTTCCAAATGAGAGGAAAACCTCCACATCTCCTCCTCGCCAACCTTGCCAAAATCCATGGGCCACTCATATCTCTGCGCCTCGGCGCACAACTCCTCGTTGTCGGGTCCTCACCTGCAGCTGCTGCAGAAATTCTCAAAGTCCATGATCGTATACTTTCAGGTCGGTGCACGTCTCGTCCGCTTCGAGGCTCAAAGCTTCATAATTTATCATCAGTGCTTTGCGATGAGTGTGGCGATGGT…	MNLTTKDLGDMNTLFLAILLLSLVSLIIFKYTSKAKTLPLPPGPYAWPLVGNIFQMRGKPPHLLLANLAKIHGPLISLRLGAQLLVVGSSPAAAAEILKVHDRILSGRCTSRPLRGSKLHNLSSVLCDECGDGWKNIRGIYRSELFSTKAIESQVKIREKKVVEMIAYLGSKEGEVLRIKEIVFVAAMNIISNILFSVDFGDFEGEGKEMKGYTRRFAEVSSTPQLADMFPLLFGGFDVQSMNKKLMDLFEKMCACWGSIAKERREGKTDQNHVDFMDALIGKGFTDDQINPLIQELFTGGIDSTSATSEWLMVELLKNKEATSKLRDELEKVIGSGIVRESYLPNLPYLEACVKETLRLHPPGPLLLPHCAVQTCEVMGYTIPKDTLILVNMWAIARD…
AeCYP82A1	Arel.002357	ATGGATTTTTTCCTCTCATTCCCAATATCCACTACTGCCAGCATCTTTACTTTTACTGTATTTCTCTACTATCTCTTCGTTTGGATACCAAAATATTCCAAGAGAAAAAATGCTCAAAACAAAATAGCACCTAAAGTAGGTGGAGCATGGCCTATAATTGGACACGTCCATCTTCTAGGAGGCCCTAAGCCCCCTCACATAACGTTGGGGTCTTTTGCTGATAAATATGGACCAATTTTCTCCATCAGGCTCGGTGTAAATCAAGCTTTGGTGGTGAGTGATTCCAAAATGGCTAAGGAATGTTTAACTACAAATGACAAGGTCTTTGCTACACGCCCAAAAACCCTAATAGGCGAGGTCATGGGCTACAATTACGCGATGATTGGGCTGGGCGCTTAT…	MDFFLSFPISTTASIFTFTVFLYYLFVWIPKYSKRKNAQNKIAPKVGGAWPIIGHVHLLGGPKPPHITLGSFADKYGPIFSIRLGVNQALVVSDSKMAKECLTTNDKVFATRPKTLIGEVMGYNYAMIGLGAYGHYWRQVRKIMVLEFLSSRSLLQHAHIRVSEIKLCINEVYEFWVKNKNASNMVKMEMKECFGNLILNIVARMLVGKRYSPLDEEGVNFQKAMKMFLDLMGTFMVSDAVPFLRWLDLGGYEKLMKKTAKEMDDILEDWLKEHKTKRNSGLLKGEEQDFMDAMLAHTLIAGGTDTTTVTLTWALSLLLNNPHALKMAQDELDIHVGRERQVEESDMEKLIYLQAIIKETLRLYPAAPLGVPHEAMEDCVVGDYHVPKGTRLLLNLWKI…
AeCYP72A35	Arel.033186	ATGCTTGGATCGGACGGCGAAGGCGATGACGTCCTGGATGGTGAGGCGGAGGGAGACGGTGCGCCACCAGTCGGAGACAGAGTGGGAGGGGGCGGCACGGTGGTTGGAGGTGGAGATGGAGAGGAAGAAGTCCTTGATGAGGAGCTTGTGGGTAGGGGACCACTTGCTGTACCAGATGAGGTAGAAGTTGATGGGGGAGGAGAGGACGGGCCCCATGTGGTAGTGGAGGTTGACGAGGGACCATTTCGGTTGATATTTCTGAATCCGTCTGCTGTTATAGGGACCGTTGCATCTGCTGGCATAGCTTCTTGTTTTGTTGTTCTTATAGTTTATGCATGGAGATTTTTGGACTGGATTTGGTTTAAACCAAAGAAGCTAGAAAAAATCTTGAAACAACAA…	MLGSDGEGDDVLDGEAEGDGAPPVGDRVGGGGTVVGGGDGEEEVLDEELVGRGPLAVPDEVEVDGGGEDGPHVVVEVDEGPFRLIFLNPSAVIGTVASAGIASCFVVLIVYAWRFLDWIWFKPKKLEKILKQQGFRGNAYSLLVGDLHDGSEIIKEANSKPINLDDDIMPRVIPIAYNTISKYGKKSFTWAGQIPRVHITDPQLAKEIVSKSDNFQKSFKTKNPLIDLLITGVIAFEGEKWRKHRRILNPAFQLAKLKQLLPAFHNSATDMMNKWEEILSKEGSVEVNIWPYLETFSGDAISRTAFGRSYIEGKRIIKLLKQLSEVTAEAMQSVYIPGMRFLPTKRNNIMKQLDQEVQVLITDMINERTKTMKEGADEDDILSILLKSNFEEMQHGKNS…
AeCYP736A24	Arel.022072	ATGAGAAAGGAGGAGCTTGGGTTATTGGTGAAGGAGCTTAAGGATGCCGCCGCTAAATGTGAGGTGGTGGATATTAGTGCAAAGGTGGCTGATCTTATTGAGAACATGACTTATAGGTTGCTTTTGGGACGTAGCAAAGATGATAGGTTTGATCTCAAGGGTATTATGAATGAGGCCTTCCTGTTGGCTGGAAAGTTCAATCTTGCAGATTTTGTGCCTTTCCTAGCCCCACTTGACCTTCAGGGATTGACTCGAAGCTTTAAGGAAGCCGGCGAGAAACTTGACAAAATGTTGGAGCTAATTATTGATGAGCATGAACAAAACGCAAGTAATGGACTTCAAAAGAAAAATACCGACTTTGTTGATGAAATGCTATCATTGATGAAAAATTCCACAAGC…	MRKEELGLLVKELKDAAAKCEVVDISAKVADLIENMTYRLLLGRSKDDRFDLKGIMNEAFLLAGKFNLADFVPFLAPLDLQGLTRSFKEAGEKLDKMLELIIDEHEQNASNGLQKKNTDFVDEMLSLMKNSTSTHHELAKAIDRSSIKSIMVDIITAAIDTSYTSIEWILAELIRHPRVMKKCQEEVNTIVGLDRMVEETDLPKLEYLYMVVKEGLRLHPIAPLLGPHESREDIVIDGYYIPKKSRVIVNAWALGRDPNVWSEDVEEFLPERFTRSKIDLRGRDFQLLPFGSGRRGCPGMQLGLINIQFVLAQLLHCFDWELPSGISTGDLDMTEKSGLTIPRIQHLLLVPKVRI
AeCYP75B1	Arel.020036	CCAACGGAAAACTCGGACGATCGAGAAGAAAACAATCGCGGCAATGGTGGTGAGCCTAAGACGGATCTAATACTTTCAATCGACGGATATCCACTTCTTGAGCCAAATCTTACCAAAGTTTATCCGCCATTAATTGAGGAACCTGCTGCCATAATGCTAAAATTTGATGTAAAACTATCACAGCTGCCAAGAGACAGAAATAGCATTTCCAAAGCCCTTGAAATTGTTGATTTAATGATAGCATTGGCTCAACAAGAGCTGATTAGCAGCAACCTAGTTAAACAGCTCGCAGATGATGGTGTGAAGAAGAAAATGAGGAAACCGAAAACAAAGATACCACGAGGACCCCAACAATACCCTACTAAAGTCCATCAGAAGCAAATTTCTGGTGATTCAGAT…	PTENSDDREENNRGNGGEPKTDLILSIDGYPLLEPNLTKVYPPLIEEPAAIMLKFDVKLSQLPRDRNSISKALEIVDLMIALAQQELISSNLVKQLADDGVKKKMRKPKTKIPRGPQQYPTKVHQKQISGDSDTLKSPSAVGWPVQPPLFLPVTPPPQAGHEEIDAIRSVLQDSEKVLDRLKKQEEDMVQEVTQRAKDLHKKEFKLPHQKPMPCLAEKNACLECYGENVKDPLKCASLVKQFADCARTARQQVSSVDKYRNYLLFNKALGRRYPLVLLVPTRTELQTTLSDAWSWWWHNSNSNNDLFTILITSTAVILVISWFYWIFIKPEKVNPPLPPGPRSLPLVGNLLSLDPELHTYFAGQARTYGPILTLWLGQKVGIVVTSPALAREVLKEQDT…
AeCYP716E1	Arel.030725	ATGGATACACTAGTGAGCTTAATCCCATATCTACTCCCTCTTGCAATTTTCCCAATATCCTTGTCTCTATTTTTCCTCCTGCAAAAGCCCACTTCTGGCAGCTCAAAAGATGTTCCCCCAGGAACAAGTGGATGGCCTATGGTTGGTGAAAGTATAAGATTTGCCTTATCCGGACCGCAAAAATTTGTTAGCGAAAGAATGAAAACATACTCCCCCGATGTGTTCCAAACGTCGTTGCTAGGAGAAAGAATGGCAGTGTTTTGTGGAGCGCAAGGGAATAAGTTCCTCTTCACAAACGAGACCAAACTTTTGACCTCGTGGTGGCCACAATCCATGAAAAAGGCCTTACTTTTCCCGGAATTTGTTGAGAATTCACTGAAAGAAGTTTCAGCACTAAAG…	MDTLVSLIPYLLPLAIFPISLSLFFLLQKPTSGSSKDVPPGTSGWPMVGESIRFALSGPQKFVSERMKTYSPDVFQTSLLGERMAVFCGAQGNKFLFTNETKLLTSWWPQSMKKALLFPEFVENSLKEVSALKRSFMHDILKPEALKQYIPVMDSMAREHVESEWTPREVVKVFPMSKKYTFDLACRLFMSVVDPEHVNRLAKHFTLVTSGMFSVPIDLPGTAYNGAIKGGKLVRAELMKIITERKKEMIENKETTGRDLLSRMLLVTDETGEFMSEMDISNNIIGLLVASYETTSTAVTFVLKYLAELPHIYNEVLKEEVSALKRSFMHDILKPEALKQYIPTMDSMAREHVESEWTPLDPEHVNRLAKHFTLVTSGMFSVPIDLPGTAYNGAIKGGK…
AeCYP72A19	Arel.012514	ATGCTGCCAGCCATTTATTTGAGTTCTAGTGAGATCATGAGCAAATGGGAGAAAATGGTTTCGACAAAGGGGCAATGTGAGTTAGATGTATGGCCTTATTTAGAAACTTTCACCAGCGACGTCATTTCACGCACAACATTTGGCAGTAGCTATGAAGAAGGAAGAAGGATATTTCAACTGCAGAAGGAACAAGCCGAGCTACTAATTCAGGCTGCAATGAGTAAACTTGGTAATTATTGTAGATTTTTGCCAACCAAAAGAAACAAAAGGATGCAAGCAATCGCCAAAGAAGTGAAACTTGCACTAAAGAGTATCATTAACAAGCGTTTGAAGGCAATGGAAGCCGGAGAATGTAGTCATGATGACTTATTGGGTATATTATTGGATTCCAACTCCAAA…	MLPAIYLSSSEIMSKWEKMVSTKGQCELDVWPYLETFTSDVISRTTFGSSYEEGRRIFQLQKEQAELLIQAAMSKLGNYCRFLPTKRNKRMQAIAKEVKLALKSIINKRLKAMEAGECSHDDLLGILLDSNSKEIKQHGSKNFGMTIDEVIEEYKLFYFAGQETTSNLLVWTMILLSQHPYWQKRVREEVLLAFGNNKPDLDGLNHLKVVNMIFLEVLRLYPP
AeCYP71A2	Arel.007055	ATGAACACCTTAATTCGAAGAGGACAAGCTCCAGGCGATATTCTTGATATCTTACTCCGGATGAAAAAGGATAAACTATTTTCATTCGACCTCACTTTTGATCACATAAAAGGAGTGCTTATGAATATTGTGATTGGTGGGTCGGATACAAGATTAGCAGCTGTGGTTTGGGCCATGACAAGACTAATGCAAAACCCTACACAAATGAAGCAAGTACAAGAAGAGATTAGAAAGACAATTGGAAAGAAAGGACATATAGATGAAGATGATCTTCAAAAGCTTGTTTATCTCAAGGCAGTAGTAAAAGAGACTATGAGATTATTCCCACCAGGTCCACTTCTTTTGCCAAGAGAAACAATTGATAGCTGTGTCATTGAAGGGTATGAAATTCAACCAAAA…	MNTLIRRGQAPGDILDILLRMKKDKLFSFDLTFDHIKGVLMNIVIGGSDTRLAAVVWAMTRLMQNPTQMKQVQEEIRKTIGKKGHIDEDDLQKLVYLKAVVKETMRLFPPGPLLLPRETIDSCVIEGYEIQPKTLVYVNAWAIGRDPEAWENPEEFLSERFLGNPIDFKGHDFELIPFGAGRRGCPG
AeCYP76A6	Arel.014013	ATGGACTTGAGTAGTTATTTGGGTATCTATTCAATTTCTTTATCAGCAGCTATTCTATTCCTAATAATTCTACTGCCCCTCAGATCAACAAAGAGCAGCAGAAGCAGCAACCGGCGACCACCAGGGCCAACAGGATGGCCCTTGTTCGGCAACATGTTCGATCTCGGAAAAGAGCCGCACAAGAACTTATTCAAACTCAAATCCCGGTACGGTCCAGTAGTTTGGCTCAAACTCGGCACGATGGACACCGTGGTTATACAGTCCGCCGCGGCTGCCGCTGAGTTTTTCAAGAAGCATGACCTCACTTTTATTGACCGCAAAGTTCCCCAGGCCATGACCGCCCTGGGCTTCCATGAAAGCTCACTGGCATTTTCTGATCACGGACCGTACTGGCGCCTG…	MDLSSYLGIYSISLSAAILFLIILLPLRSTKSSRSSNRRPPGPTGWPLFGNMFDLGKEPHKNLFKLKSRYGPVVWLKLGTMDTVVIQSAAAAAEFFKKHDLTFIDRKVPQAMTALGFHESSLAFSDHGPYWRLVRKLASSELLVNPRLNQSSGTRQRCIDKMIDSIADDSGKSLTLGGTGEVELAPFFFRMAFNLIANLMLSRDLLDTQSEEGRDFYLALNGILEWVGTPNAADFLPILKWIDPQGIKRKMTRDLKTCLKIIGKYVKERIQEKKESTEELKKEFVDVFLDYQGHDGISERDIHFVIMEVFFAGSKTISLTLEWAMTELLRNPATMVKVKQDLGRLGGPERKIEESDINNLPYLHAVVKETLRLHGPGPFWLPRKAMKDTDYMGYTIPKD…
AeCYP714C8	Arel.015044	ATGGCAGGTGTTTTGATTAAAGATATGTTGATTGCATTCTTGCTAGTGGGTTTAACAACACTGGCTGTGTATTTCTATGCCATCTTTTGGGTGAAGCCTGAAAGGCTTCGAAAGAAACTGCTGTTACAAGGAATTAATGGTCCTGCACCATCTTTTTTCTATGGTAATTTCAAAGATATTGTGAGAATCCATAAAGAGATTGCGATGGAAAAGCCTAATCATGATGCTGTTGATCGATTTTCGCATGATTTTGGATCGTATCTCTTTCCTCATATCAGAAAATGGAGACAGGACTACGGTCCAGTATTCATTTACTCCATGGGAAACAAGCTTCATATGTACATGGATGATTTTAATCTGGTAAGAGAATTTTGTCAGTGCAAATCAGCTGAATTTGGA…	MAGVLIKDMLIAFLLVGLTTLAVYFYAIFWVKPERLRKKLLLQGINGPAPSFFYGNFKDIVRIHKEIAMEKPNHDAVDRFSHDFGSYLFPHIRKWRQDYGPVFIYSMGNKLHMYMDDFNLVREFCQCKSAEFGRASFLKKHRGALVGSSILTALGASWVHQRKILAPEFFMNKIKGMVDMMTASTISVLSQWEGKISEAGSAALIRVDMEFKDLAAEIISRTLFGSYYARGSEIFEKIKDLQEVLSKQVLLIGIPGLRYIPTESNREVWKLDREITSAILRLIKDYKLKAVKEENLLQVLIDNFDPECGADVTSNKNASNLIVDNCKALFFAGHETTSNAAAFVLLLLAHHPEWQKRVRDEFGDFLIPEGVVLAVPVASLHLDTTIWGSDAGEFNPQRF…
AeCYP51G1	Arel.019561	ATGGCGTTTTCGAATCAGCTATCGCAAGAAATGGCGCTACAGCATTTCTCAGACCAACACTTGGCCGGAGGAGCCGATAATAGCAACACTAATTCGGTTTTACGAAACGTATTGTCGGAACAGCTCGGCCAGTCTTCGCCGACCGGTGCCGGAAAATCGCCGCATCACCACCAACAAACGCCGCCGACGTGGCTGAACAGCGCGATTCTCCGGCAGCAGAGTCAGTACGGTGATGGCGGGAATTTCCTCAATTTGCAAACGGCGACGAACTCTGATTCCGCACAGGCGTCGAATCAGTGGCTCTCGAGACCGTCGATTCTTCAGAGGAACGATATAAACGACGACGTTCAGGTTTCCAACGATTCGATCCTCGCGATTTCGCATGAGTCGGCCGATTTG…	MAFSNQLSQEMALQHFSDQHLAGGADNSNTNSVLRNVLSEQLGQSSPTGAGKSPHHHQQTPPTWLNSAILRQQSQYGDGGNFLNLQTATNSDSAQASNQWLSRPSILQRNDINDDVQVSNDSILAISHESADLNNDNKNDDVPVSNNDSMNWQNARCKAELLAHPLYEQLLSAHVACLRIATPVDQLPRIDAQLAQSQQVVAKYSALGNGSIGEDKELDQFMTHYVLLLCSFKEQLQQHVRVHAMEAVMACWEIEQSLQSLTGVSPGEGTGATMSDDDDDQVDSDANLFDPSLEGADNMGFGPLVPTESERSLMERVRQELKHELKQGYKEKIVDIREEILRKRRAGKLPGDTTSVLKAWWQSHSKWPYPTEEDKSRLVQETGLQLKQINNWFINQRKR…
AeCYP82D1	Arel.012991	ATGGAGACCTTCCTCACACAACTATACAGTACTACAATAGCTGGTCTGTTTGCAATACTATTAGTCCTTTATTATTTGTCAACTAGAATTAGTAAAAAAAATGTAGCACCTGAAGCTGGTGGTGCATGGTCTATTATAGGTCATCTACACCTCTTAGGAGGCTCAAAGCTGCCCCATCTTGTATTTGGATCCATGGCCGACAAATACGGGCCGATCTTCACAGTCCGGCTTGGAGTTCAGCGGTCCTTAGTGGTGAGCAGCTGGGAGATGATGAAGGAGATTTTCACTACTAATGATGTAATTGTGTCGGGTCGACCCAAATTCCTAGCAGCTAAACATTTGTCTTACAACTATGCTATGTTTGGGTTTTCACCCTACGGTTCATTTTGGGTGGAGCTC…	METFLTQLYSTTIAGLFAILLVLYYLSTRISKKNVAPEAGGAWSIIGHLHLLGGSKLPHLVFGSMADKYGPIFTVRLGVQRSLVVSSWEMMKEIFTTNDVIVSGRPKFLAAKHLSYNYAMFGFSPYGSFWVELRKITTLQLLSNRRLELLKHVRVSEMEISMRQLYKLWSENKNGSGRVLVDMKKWFGELNLNVTLRMVFGKRYFGGGAASNDEEARRCRRVMREFFRLLGVVVVADSLPFLRWLDLGGYERAMKKTAREMDSIVSGWLEEHRIKSDSSGEANMEQDFMDVMLSAVKNIDLCGFDADTVIKATCMVIITSATDTTAVELTWALCLLLNNRHVLKKAQEELDNVVGKQRQVKESDLNNLIYLQAIVKETLRLYPAGQLAGQREFSDDCTV…
AeCYP736A25	Arel.031140	ATGTCTCCCCTAACCTTTCCAATTCTCTCTCTCCTCCTTGGACTCCTCTTGTGGCTCATCCATCTCCGCCACCGGACCGCCACACCACCACCAACACGCCACCACAAACCGCCACCAGGTCCTCGAGGTCTCCCAATCATCGGTCACCTTCACATGTTAGGAAACCTCCCCCACCGCACCCTGTATCACCTGTCCCAAAAATATGGTCCCATAATGTCCCTGCGCCTAGGCAATGTCCCAACAATAATAGTCTCGTCACCGGAAGCCGCCGAGCTCTTCCTCAAGACTCATGACACTGTTTTCGCTAACCGGCCTAAACTGAAAGCATCGGATTATTTATACGGACCAAAAGGCATGGCCTTCACGGAATACGGTCCTTATTGGCGCAACGTTAGGAAA…	MSPLTFPILSLLLGLLLWLIHLRHRTATPPPTRHHKPPPGPRGLPIIGHLHMLGNLPHRTLYHLSQKYGPIMSLRLGNVPTIIVSSPEAAELFLKTHDTVFANRPKLKASDYLYGPKGMAFTEYGPYWRNVRKFCTLELLSTRKIDSLAGIRRELLGLLVEELKEAAVAREVVDISEMVGGLIEDMTFRMIFGRNKDDRFDLKGCIQELSDTAGSFNIAEYVPFLGPLDLQGLTRRIIANGNALDKMLETIIDEHEEDANSVHKKQFKDFVDELLSLKNKSTRTTHEELANTIDRIHIKAIILDMITGAIDSSRTGIEWILSELIRHPNVMANLQEEIKTIVGDNEIVEEKDLPKLKYLDMVVKESLRLHPVAPLLVPHESMEDIVINGYYIPKKSRII…
AeCYP72A20	Arel.012518	ATGTACTACTACATATCATCTCCCCTTTCTCTCTGTGTCATTTTCTCTCCTCCCTCGTCTCTCTCATTGATGGATTTAATTTTGAATCTGATTGTAAGCTCCTGTGCAATTGTTGTAGTAATATTTGTATGGAGAATCTTCAACTCTGTGTGGTTGAGACCAAAGAAGCTAGAAAAGATTCTAAGGCAGCAGGGTTTCAATGGAAATTCATACAGGCTATTGTTTGGAGACCTGAAAGATACGGCAAAGATGAGAAAAGAAGCCAAATCCAAACCCATCAATCTCTCTGATGATATTCTCCCGCGCGCTGCTCCCATCATCCACAATACCATCAAAAAATATGGAAAAGATTCATTTGTATGGCTTGGACCAAAACCATTGGTGTACATCACGGACCCT…	MYYYISSPLSLCVIFSPPSSLSLMDLILNLIVSSCAIVVVIFVWRIFNSVWLRPKKLEKILRQQGFNGNSYRLLFGDLKDTAKMRKEAKSKPINLSDDILPRAAPIIHNTIKKYGKDSFVWLGPKPLVYITDPDHIKEVLNKFYQFQKPRGGNPLTKLLATGLLDAEGDRWVKHRKIINPAFHLEKLKNMLPAIYLSSSEIMSKWEKMVSTKGQCELDVWPYLETFTSDVISRTAFGSSYEEGRRIFQLQKEQAELLIQAAQTIYIPGMRFLPTKRNKRMQEIAKEVKLALKSIINKRLKAMEAGECSHDDLLGILLDSNSKEIKQHGSKNFGMTIDEVIEECKLFYFAGQETTSNLLVWTMILLSQHPYWQKRAREEVLLAFGNNKPDLDGLNHLKVV…
AeCYP716A8	Arel.002596	ATGACAGCAGCAATGGAGTTGTTTTTCTCCCTATCCCTTGTGCTATTATTCTTTCTTCTCTTTGCCTATTTTTCTTATCAAATTTTCACTACAAAACACAGAAATAATGATTCAAAAATTCCCCTCCCACCGGGTTCAACAGGCTGGCCTTTGATAGGCGAAAGTTTAAATTATTTGTCTACTATCAAAAGTGGGCTTCTTGAAAATTTTGTGACATATAGGAAGGAAAAGTACTCCACCAAAGTTTTCAGGACATCACTTTTTGGAGAATCAGTGGCAATCTTGTGTGGCCCTGAGGGGAACAAATTCCTCTTCTCCAATGAAAGAAAGCTAGTCCAAGTTTGGTTCCCGAACTCTGTCGAAAAGATCTTCGCCCAATCTCATGCCGAATCCAACGCA…	MTAAMELFFSLSLVLLFFLLFAYFSYQIFTTKHRNNDSKIPLPPGSTGWPLIGESLNYLSTIKSGLLENFVTYRKEKYSTKVFRTSLFGESVAILCGPEGNKFLFSNERKLVQVWFPNSVEKIFAQSHAESNAESFYKIRKMMFILKADALKKYVGLMDTVMKQFLQTHWNHHRQPQINVHNTVMNYSLMLSCRVFMSIDDAEQVRKIGNSIHHIEAGLFAVPINLPGTAMNRAIKTVKLLSKEFEAVVKQRKADLLENKQASPTQDLLSHLLLTPNEDGRFMSESDIARQLLGMVQGAYSTLNVVIAFIINYLAELPDVYDQVLKEQVEIAKSKNPKELLNWEDLSKMKYSWNVVQEVLRIRSPGIGVFREAITDFTYAGYLIPKGWKLHLIPLATHK…
AeCYP736A26	Arel.021407	ATGTTTGCATGGGCATTAACTCTTTCCTTCCTTCTCCTTGGAGCACTCTGGTGGATCATCACCTCTTCAAAACGCCACCGTAAAGTACTACCACCGGGTCCCCGAGGCTTCCCAATTATCGGTAGCCTCCCGATGTTAGGTAACCTCCCCCACCGCACCCTCCACCAGTTAGCCAAACAGTACGGTCCTATCATGTCCATGCGTTTAGGTTCCGTCCCAACTATCGTAGTCTCCTCCCCTCAAGCTGCCGAGCTTTTTCTCAAGACTCATGACATTCATTTTGCTAACCGCCCCAAGTTTCAGGCCGCGGAATATATGTCATATGGTAATAAGGGCATCACCTTCACCGACGGTCCATATTGGCGCAATGTAAGAAAGTTTGTTGTACAAGAGCTTCTT…	MFAWALTLSFLLLGALWWIITSSKRHRKVLPPGPRGFPIIGSLPMLGNLPHRTLHQLAKQYGPIMSMRLGSVPTIVVSSPQAAELFLKTHDIHFANRPKFQAAEYMSYGNKGITFTDGPYWRNVRKFVVQELLAPSKINSFVGMRKEELGLLVKELKDAAAKCEVVDISAKVADLIENMTYRLLLGHSKDDRFDLKGIMNEAFLLAGKFNLADFVPFLAPLDLQGLTRSFKEAGKKLDKMLELIIDEHEQNASNGLQKKNTDFVDEMLSLMKNSTSTHHELAKAIDRSSIKSIMVDIITAAIDTSYTSIEWILAELIRHPRVMKKCQEEVNTIVGLDRMVEETDLPKLEYLYMVVKEGLRLHPIEPLLGPHESREDIVIDGYYIPKKSRVIVNAWALGR…
AeCYP716A9	Arel.025443	ATGGACCTTCTCTTCATCCTCTCTGCTCTTGGAATCATCTTCATCTCTCTCTTTTTCCACCATTCTCTCTCCAAAAGCAAGCCAAAATCTGGAGCTCCATATCCTCCTGGAAGATCCGGCTGGCCACTCTTAGGCGAAAGCCTCGATTATTTCTCAAAACTCCGAAATGGCATGAACGAAAGATTTGTAATGGACAGGGTACAAAAATACTCCTCCAGAGTCTTCAAATCAAACGTGCTCGGGGAGAAAATGGCATTTTTGCCCGGGGCCGAGGGCAACAAGTTCTTGTTCTCGAATGAGAACAAGTTTGTCCAGGTCTGGTGGCCGAGCTCAGTTAACAGTGTTTTTTTGAAAACTGATAATCGGTCAGCTCAAGATGAATCAATTAAAGTACGCAGA…	MDLLFILSALGIIFISLFFHHSLSKSKPKSGAPYPPGRSGWPLLGESLDYFSKLRNGMNERFVMDRVQKYSSRVFKSNVLGEKMAFLPGAEGNKFLFSNENKFVQVWWPSSVNSVFLKTDNRSAQDESIKVRRLLPPFLKAEALKAYVGIMDTVCKKHLDTHWVGSQVQVCPLVRKYTFTLACNLFLSLKDPENLEKLNKIFDDVACGIVSIPINLPGMSFYKAIKASQEIRGVIEGMVKQRKIDIAENEATPTQDVMSHMITAMAENKSEDPITDADIASDLLGLLIGGYDTINTTLVFIMKFLAEQPHVYEEVLKEQTEIANLKQGKLLSWEDLRKMKYSWSVWCEVLRIRPPTVGAFRVAIADFAYGGYTIPKGWKLHYVPHVTHKNPEYFPNPDK…
AeCYP736A27	Arel.031165	GGATTGACTCGACGTCTCAAGACCACTAGCAAGGCTATTGACAAAATCTTGGATTCTATCATAGATAAGCATGAACAAGATGCTAGCGGTGGGCACAAAAGGCTTGATAGAGATTTTGTTGATGTCATTCTATCTTTGAAGAAAAATTATTCAAGTACCCATGACCAATTATCCAACACAATTGATAGAACAAATATCAAAGCAATTATACTAGACATGATCTTTGGAGCCATTGAGACGTCGCACACTGCAATTGAATGGACAATGTCAGAACTTATAAAGCATCCGAGGGTGATGAAACGACTTCAAGAAGAACTTAATGCTATTGTAGGAGATAATGAAATGGTGGAAGAAGCTCATTTGCCTAAGTTAGAATACCTAGACATGGTAGTTAAAGAA…	GLTRRLKTTSKAIDKILDSIIDKHEQDASGGHKRLDRDFVDVILSLKKNYSSTHDQLSNTIDRTNIKAIILDMIFGAIETSHTAIEWTMSELIKHPRVMKRLQEELNAIVGDNEMVEEAHLPKLEYLDMVVKESFRLHSVAPLLVPHESMEDIVINGYYIPKKSRIIINNWGLGRDPNVWSNNVLEFLPERFIGRNIDLRGQHFQLIPFGSGRRGCPGTYLGLINIKLVVAQLVHCFNWELPIGKLVDELNMDEKFGLSLPRAKPLLAIPTLRI
AeCYP71B3	Arel.002065	CGAGTGCACAAAGTTTGCATCTTAGAGCTCCTAACTTCTAAGGGCGTTCACTCATTTAAATCATTGTGGGAAGAGGAGGTGTGCAACCTTATTGAGTCCATTTCCTCATCTCTAGGGTGTTGTATCAATATTAGTGAGAAGCTATTCAAACTGACTAATTGCATTACTTCAAGGGCGGCATTTGGTAATAAGTGTAAAGATGCAGATGAAGGAGTCAAGTTATCTGGTGGATTTGACATGTTTGATATCTTCCCCTCCCTTAGGATTCTTCAGTTCTTACGCAGGATAATGCCGGTACTAGAAAAATTGCACATAAGGTTGGATAAGAGACAAAGATTCGCCCCAAAACTTCCACCAGGGCCGTGGAAGCTGCCCCTTATTGGGAACTTGCACCAGTTA…	RVHKVCILELLTSKGVHSFKSLWEEEVCNLIESISSSLGCCINISEKLFKLTNCITSRAAFGNKCKDADEGVKLSGGFDMFDIFPSLRILQFLRRIMPVLEKLHIRLDKRQRFAPKLPPGPWKLPLIGNLHQLTGSTLPHHSLGDLSKKHGPIMHLKLGELSSIIISSPKAAEEVLKMHDLTFAQRPKLLAVDVMGYGDLGIVFSPYGDYWRQIRKVCILELLSAKRVYSFRSLREEEVWNFIESISSSLGCCINLSEKLIQLTNCITSRAAFGDKCKDADEFISVLKEGVKLSGGFGMFDTFPSLKILQFLHRIMPVLEKLHIRLDKILEKIINDHKAKRATNNTSGEEDLVDVLLKLQESGDLEVPITTTSIKAIISDIFSAGTETSATIIEWAMSE…
AeCYP94B1	Arel.007732	ATGGAAGGCTCTTCCCCTCCGCCGTCTGATTCCAATCCAACGGCTGGCGGCGCCTCCAAATTCCTTGCCAACCTTCCCAATCGCGGCCTCCTCACATCCACTATTCCCTCTTCTAATTCGGGTGGTGTGCGAGTTTATATATGCGATCACGATACATCGCCGCCAGAGGGCCAGCTGATAAAGACAAATCAAATGAACATACTGATTAGGTCGCTTGTGCTTAAGAAGCAGAAGGGAGAATCGAGTTCGAAGGATGCAAAGGGTGTTGCTATAAACGAGGGTTCTAGAAAGCGGGCGGCGGCAGAAAGAGCTTTAGATGGGAGAGCTTCATCTAAGAGGGCCTTGTCTAATTCTCAAAATAGTTCTCGACAAGAGGGATCTAAATCCCGTGCACCTGAC…	MEGSSPPPSDSNPTAGGASKFLANLPNRGLLTSTIPSSNSGGVRVYICDHDTSPPEGQLIKTNQMNILIRSLVLKKQKGESSSKDAKGVAINEGSRKRAAAERALDGRASSKRALSNSQNSSRQEGSKSRAPDKDFQSLTVERLRALLKEKAGQVELVTCLGFKSLHSSGVGRKLICSLDLSNINIRNLISFYQNRHRLIHWYTHLLSHSPTQTIVLQRLGARRTIITANPDNVQYILNSNFHNYPKGKPFTQILGDFLGFGIFNVDGHLWNTQRKLASHEFSTKSLREFVVKVLQEEVQTRLIPLLEMASDNRDVLDFQQVLRSFAFDTICKVSLGIDPCCLDFSRPPPQLVKAFDTASEISAMRGAAPVSAVWKAKRWLNIGSEKELREAVELVHGS…
AeCYP716A10	Arel.005788	ATGCGGAATCTGATGCGAAATCTACTGACCGGTGGAGATTCAGCATCTAAGATTCCACCACGAGCTGCAGCAGCAGCTGTTATAGCCCGTGCTATTTCCGCACTGCCTCCACATCAGAGGCATAGTCTGTCATCAAGTTCTGGAGAATTGACTTCGATATATGGAAGCAGGCCTTGTGGTCAAGTAGTGGAGGAACTTGAGGAAGAGTTCTATGAAGAGGAATTTGATCCTGTAAGACATTTTTTGGAGCACATTCCATATGAGGAAATTGAAGTTGCATATTTTGAGGAAAAGGCGGCTCTTAGATTGGCACAACTGGATAAAATATCGGAACGCTTATCCCGCCATGTTATGGAGAATCACGAAGAAATGGTGAAGGGGATGCATTTGGTAAGGGAG…	MRNLMRNLLTGGDSASKIPPRAAAAAVIARAISALPPHQRHSLSSSSGELTSIYGSRPCGQVVEELEEEFYEEEFDPVRHFLEHIPYEEIEVAYFEEKAALRLAQLDKISERLSRHVMENHEEMVKGMHLVRELEKDLKVANVICMNGRRHLNSSRNEVSRDLIVTTNSRRKQALLDMLPVLAELRHALDMQMALEVHVEEGNFCKAFQVLSEYLQVLDSFSELSAIQEMSHGVEVWLGKTLQKLDSLLLGVCQDFKEESYITAVDAYALIGDVSGLAEKMQSFFMQEVLSVTHSVLKNIIQEDMESPDMQSSRFTYSDLCIRIPESKFRQCLLETLAVLFKLMCSYYAIMSFQPENKDSTCQTLKMKQKQDKVRGFSGDVQHVNLVKNSYISQEDDGP…
AeCYP736A28	Arel.017725	TTTTTGTACCGATGGTTATCATCCGCTAGCAAAACAACCCAAAAAAATTTACTACCTTCTCCCCCAAAGCTTCCCATTATTGGAAACCTTCACCAACTTGGCATAAACATACACCTTTCACTTCAGTCCATGGCTCAAATATACGGTCCACTCATGTTGCTTCGCCTTGGGAGTGTACCTGTGCTTGTTGTTTCCTCGGTTGATGCAGCTAAAGAGATTATGAAAACTCATGACCTGATTTTCTCAGACAGGCCTAAAACAATCGCTGGTAGACTTTTATACAATTGTAAGGACGTTGGATTTGCTCCTTACGGTGAATATTGGAGGCAGGTAAAAAGTATTTGTGTTGTCCAGCTTTTGAGTAGTGCAAGGGTTCATTCGTTTCAAAATATTAGACAA…	FLYRWLSSASKTTQKNLLPSPPKLPIIGNLHQLGINIHLSLQSMAQIYGPLMLLRLGSVPVLVVSSVDAAKEIMKTHDLIFSDRPKTIAGRLLYNCKDVGFAPYGEYWRQVKSICVVQLLSSARVHSFQNIRQEEVDLLIENIKESCSKVVNLSELFVSLTNDIVSRAALGRKHSTNIEGREGGGKSKIKELFRELTKLLSVFSVGDYIPWLSWVDRISGLKRREEELIKKLDDFLEGVIKDHISISDDRNNNNIGVDRSQDFDMFAAGTNTTATTLEWTMAELIRNPNIMLKLQAEVREIGRDKSRITEEDLEKMDYLKAIIKETLRLNTPVPLLVPRVSRQDVKVMGYDIAAGTRVIINAWAIARDPSLWAEPEEFRPERFLNSPIDFKGLHFEYLP…
AeCYP72A21	Arel.002152	ATGATCTCAATTGTTTTGGTAAGTATAGTAAAATGGGCACATGAAATAGTGAAAAAGTTGTGGGTGAGGCCAAAGAAGCTGGAGAAACGTCTAAGAGAACTAGGGTTTAATGGTAATTCATATAAATTTGTTTATGGAGACATGAAAGAGTTTGGGTGGATGAGAAGTGAAGCAAAATCCAAACCCATCAAACTCTCAGACGATATTCGATCGCGCGTTTTACCATTTCACTACTATATCATCAACAAGTTCGGTAATAATTCGTTTATCTGGTTTGGGGCGAAACCGAGGTTAAATATTATGGACCCGGTGTTAGTGAAAGAGATATATTCAAGGCCCAATGATTTTCACAAACCACATCCAGATCCAGTAGCTGACCTAGTTGTTGGTGGGCTCCTG…	MISIVLVSIVKWAHEIVKKLWVRPKKLEKRLRELGFNGNSYKFVYGDMKEFGWMRSEAKSKPIKLSDDIRSRVLPFHYYIINKFGNNSFIWFGAKPRLNIMDPVLVKEIYSRPNDFHKPHPDPVADLVVGGLLAAHGKKWTKHRKIINPAFHVEKLKCMLPAISLSCDDMINKWEILVSTNGSAEVDVWPYLEDLSGDMISRAAFGSNLEEGRIIFQLHKEQTNLGFKMMGSSYTSAFRPWFFPPPKPDKRMIQIEGEIQAQIKKIINKRENATKRGEGNVDDLLSILMESNTKEIQEDDEGMRMSMEEVIDECKMFYTAGANSTSRLLVWTMIMLSAHPNWQTRAREEVLQVFGNKKLYFDGDHDFARGAKIISTYKLHIQDPELFKENMTKPNVFQK…
AeCYP93A3	Arel.012395	ATGGCTACCATCACAGACACTTACTACCTTTTTATCATATGGTTCATTTCAACTCTGCTAGTTTACTTCTTCACAAATAAGCTCCTGAAATCCAATGGTAAAATGGTCCGTCACCCTCCAAGCCCACCAGCATTACCTGTCATTGGCCATATTCACTTACTAGGTAAAATCTTACCCAAGTCCCTCCAAACCCTTGCTTCTCGTTATGGCCCCCTCATGAGGATCTCCATTGGCTCATCTACTTCACTAATTGTATCTGATGCAACGGTCGCCGGAGAAGTTATGAAAGCCCATGGCCACAATTTTTCCTTAAGGCCTGATTTTGGGTCCTCTAACTTCAGAATATACAATGACTCTTTCCTTAGTGCTGGTGATGGCACTTGTCGGCGTTTCTTGAGG…	MATITDTYYLFIIWFISTLLVYFFTNKLLKSNGKMVRHPPSPPALPVIGHIHLLGKILPKSLQTLASRYGPLMRISIGSSTSLIVSDATVAGEVMKAHGHNFSLRPDFGSSNFRIYNDSFLSAGDGTCRRFLRKICVTRLLSTQQLNQSTDIRKQELMKLLEVVLKCSEKSEACDLGAELMTMTNNIICRMTMNARCSASANESQKIREFISGIGELGAKLSFGEVLGPLKNFDLFGYGRRLRSLLMKFDKLVEGIMKDKEERHCGEREIKDMMDVLLQISKDETAQVKVARNDIKFFFLVMFLAGTDSTTAGLQWTLAELINHPDALKKLREEIMAVVGPNRLVEESDVPNLPYLQAIVKESLRLHPPLPFIMRMNKEDCNINGYDVLANSRMMINVH…
AeCYP714C9	Arel.026403	ATGCTTCTTGAAGGAGCTCAAAATAGTGAGTTGAGCCAAAATGCAATTGACCAGTTCATCGTTGATAACTGCAAGAACATCTACTTGGCTGGCTATGAAACAACCGCGGTCTCGGCCACATGGACCCTTATGCTACTGGCTGCAAATCAAGAATGGCAAGACCGCGTTCGTGCTGAGGCTATTGAAGTTTGTAATGGTCAACCTCCAGATGCTGACGCAGTCAGTAAGATGAAACAGCTAACAATGGTGATAAATGAATCATTGCGTCTATATCCTCCGGTAGTGGTGGTATCAAGGGAGGCCTTGAAGGACATGAAATTGGGGGACATTCATGTCCCCAAAGGGGTAAATGTTTGGACCTTGGTGACGACATTGCACACTGATTCTGAAAATTGGGGA…	MLLEGAQNSELSQNAIDQFIVDNCKNIYLAGYETTAVSATWTLMLLAANQEWQDRVRAEAIEVCNGQPPDADAVSKMKQLTMVINESLRLYPPVVVVSREALKDMKLGDIHVPKGVNVWTLVTTLHTDSENWGQDSYEFNPNRFANGVTGACELPHLYMPFGVGPRMCLGQNLALVELKILISLILSKFSLSLSPKYVHSPALNLVIEPGQGVNLLVKKL
AeCYP71C2	Arel.003989	ATGAAACAAAAGAAGAAAGCTGTAACAAGTAAGAACCTTCCACCAAGTCCTCCAAAACTTCCCATTATAGGAAACTTACACCTACTAGGCAAGCTGCCTCACCAAGCCTTGTGGCAACTTGCGCAAAATACCGGTCCGGTCATGCTACTAAAGTTTGGTAGCAAATATACCCTGATAATATCCTCAGCTACCATGGCCAAAGAGATCTTGAAAACTCATGACCTTAATTTTTGTACCCGGCCTAATTCGTCCGGGGCAAAAAGACTTACTTACAATTGCTTAGATGTAGCTTTTGCACCATATGGTGATCATTGGAGAGAGATGCGCAAACTCTTTGTTACTGAGCTATCGAGTTCCAAAAGAGCACCACAATTTCAAAAGTCAAGGGAGAAGGAGGTT…	MKQKKKAVTSKNLPPSPPKLPIIGNLHLLGKLPHQALWQLAQNTGPVMLLKFGSKYTLIISSATMAKEILKTHDLNFCTRPNSSGAKRLTYNCLDVAFAPYGDHWREMRKLFVTELSSSKRAPQFQKSREKEVNELINFLSSKSGSPVHLDEKFCCMMDEIVCVVAFGKSHRGEKFNGKELKEVIGDAMMILDSFSAGDFFPWIGWIIDLISGGERKRLEKCFKQLDGYFQMVLDEHLDKARLKLGHDEQDVADSMIRRLSKGETIGNSCLTKNHIKAIFLNIFLGGVDTSSVTMAWAMSELIKNPRVMQKLQTEIRQLVPSKSKVQEADLPNLTYLKMVVKETLRLHAPVPFLIPHESICHSKIGGFDIFPKTRVLVNVWGIGRDPNSWNNPNKFFPE…
AeCYP82C3	Arel.018564	ATGGAATTCTTCTCCCATTTCCTAGCAATTTTAGGGTTTTTAGCTTTTGTCGCCACCTATTATTTCAAGAGAAAGAGAGCAAACAATAACAAAAGCAAGAAAACTAAAGCCCCTCAACCACCTGGGGCATTGCCCTTCATAGGTCACCTACATCTTTTACGGGGTCAAGACCCTATTGCACGAACCCTCGGAACCATTGCCGATGAATTGGGCCCGATTTTCTCTCTCCGGCTCGGCAACCACCATCAATTAGTGGTGAGCAGTTGGGAGATGGTCAAGCAGTGCTTCACAACCAATGATACAATCTTCGCAACACGACCAAGTATGGCTGTGGGCAAATATTTGGGGTATGACTATGCAACTTTTGCACTAGCACCTTATGGACCATACTGGCGTAAT…	MEFFSHFLAILGFLAFVATYYFKRKRANNNKSKKTKAPQPPGALPFIGHLHLLRGQDPIARTLGTIADELGPIFSLRLGNHHQLVVSSWEMVKQCFTTNDTIFATRPSMAVGKYLGYDYATFALAPYGPYWRNVRKIVTLELLTNHRLEKLKHVRASELNHCIRDLYSLCTKNEDLTGKVHINKWFDDLTFNITIRILAGKRFDANSSIEDLHIKEAIKRALYLGGVFVVSDFIPSLEWMDIGGHIKSLKQTFKELDKVFGEWLEEHVQKRLVCGTNGTEADFMDVMLSILAEDSTTFGQDRCTIIKATILILIMTGSESAAETLIWALSLLLNNRHVLKLAQEELDIKVGRHKWVEESDIKHLTYLQAIVKETLRLYPPGPLGGPREATQDCHVGGYY…
AeCYP94B2	Arel.005324	ATGGAAGACTCTTCTCCTTCACCGTCTGTTTCTCCGGCCACCGGCGCATCCAAATTCCTCGCTAACCTTCCCAATCGCGGCCTCCTTTCGTCCACTATCCCCTCTGCTAATCCGGGTGGTATGCGAGTTTATATATGCGATCATGACACATCTCCGCCAGTGGACCAGCTGATAAAGACAAATCAATTGAATATACTTATCAGGTCTCTTGTGCTTAAGAAACAGAAGGGAGATTCGAGTTCAAAGGATGCAAAGGGTATTTCTATGAATGAGAGTTCTAGAAAGAGGGCGGCAGAAAGAGCTGTGGATGGCAGAGCTTCAACTAAGAGGGCCATGTCTATTACTCAAAATAGTTCTCAACAAGAGGGAACTAAATTGCATGCACCTTACAAGAATTTT…	MEDSSPSPSVSPATGASKFLANLPNRGLLSSTIPSANPGGMRVYICDHDTSPPVDQLIKTNQLNILIRSLVLKKQKGDSSSKDAKGISMNESSRKRAAERAVDGRASTKRAMSITQNSSQQEGTKLHAPYKNFQSLTVERLRALLKEKVLFAETHVFPVTSSPDFLGLVFLISFYQNRRRLIHWYTHLLSASPTQTIVVQRLGARRTIITANPNNVEYILKSNFDNFPKGRPFTEILGNFLGFGIFNVDGPLWNSQRKLASHEFSTKSLRQFVVKVLEEQVQTRLLPLLEMASDNDTVLDFQHVLRSFAFDTICKVSMGIDPCCLDFSRPAPPLVKAFDTASEISAMRGAALISAVWKTKRAFNIGSEKKLREAVQLVHGSVLEIIRAKREKLKKTTGE…
AeCYP86A1	Arel.016254	ATGGATATGGCCATAGCTTTACTGATATTCACTGCTATTACTGCCTACCTGCTATGGTTCACCTTCATCTCACGGTCGCTAAAGGGTCCACGTGTCTGGCCCTTATTGGGCAGCTTACCGGGGTTGATCGAGAATTGTGACCGCTTGCATGATTGGATTGCCGATAACCTTCGGGCGTGTGGTGGCACGTACCAGACATGCATATGTGCCATACCCTTCTTGGCAAGAAAACAAGGCCTCGTGACTGTCACGTCTGACCCGAAGAATTTGGAGCACATATTGAAGACCCGGTTTGATAATTACCCGAAAGGTCCAACATGGCAAGCTGTGTTTCATGATCTACTAGGTAAAGGGATATTCAATTCCGACGGTGACACGTGGCTTTTTCAAAGGAAGACG…	MDMAIALLIFTAITAYLLWFTFISRSLKGPRVWPLLGSLPGLIENCDRLHDWIADNLRACGGTYQTCICAIPFLARKQGLVTVTSDPKNLEHILKTRFDNYPKGPTWQAVFHDLLGKGIFNSDGDTWLFQRKTAALEFTTRTLRQAMARWVNQAIKHRFCPILKTAQLEAESVDLQDLLLRLTFDNICGLAFGKDPQTLAPGLPDNSFASAFDRATEASLQRFIFPEVIWKLKKWLGLGLEVSLSRSLTHVDKYLSDVIDTRKLELTNQQKGGNPHDDLLSRFMKKKESYSDKFLQHVALNFILAGRDTSSAALSWFFWLITQYPTVEEKVLREICTVLMGTRGDNVSSWIDEPLGFDEVDCLVYLKAALSETLRLYPSVPEDSKHVISDDVLPDGTFV…
AeCYP716B2	Arel.020377	ATGAGCATTTTCTTCACCATTTTCCTATTCCTTCTCCCCGTCGTCGTCCTCCTACTTAAGAGGGGAAGAAGATCATCGCAGAGGCTTCCACCAGGGTCACTGGGAATACCTTTCATAGGCCAAAGCCTCAGCCTTCTCCGCACGATGAAGGCCAACACAGCAGAAAAATGGCTCGAACAAAGAGTTAAAAGATACGGTCCAATATCAAAACTAAGCCTCTTTGGCACCCCCACAGTTTTTATACACGGACAGGCTGCAAACAAGTTTGTTTTCACTGCCGATGGCAGCATGATCAGTAACCAGCAGCCCAAGTCAATTAGGATGATACTGGGTGACCGTAATCTATTGGAACTCAGTGGCGAGGATCATAAGCGTGTCAGAGCTGCTCTCATGTCGTTC…	MSIFFTIFLFLLPVVVLLLKRGRRSSQRLPPGSLGIPFIGQSLSLLRTMKANTAEKWLEQRVKRYGPISKLSLFGTPTVFIHGQAANKFVFTADGSMISNQQPKSIRMILGDRNLLELSGEDHKRVRAALMSFLKPESLKQYIGKMDSEFRTHLEMHWEGKDQVTVLPLMKTLTFNIICSLLFGLERGARKDKLIKLFQEMIEGMWSIPFNLPFTRYSRSLRASASVQHMVRELIHEKRVELENKGAAASSSLQDLITCLLSIRDDENNKQVISENEIAHSVMLIMVAGHDTSSVLITFILQLLANNTTLYQAVLQEQEEIAKSKPLGERLKWDDLAKMKYTWRVALEILRTIPPIFGGFRKALKDIEYGGYLIPKGWQIFWATSMTHMDSSIFKEPSK…
AeCYP736A29	Arel.031614	TTGACTCGACGTTGCATGGCAAACCGAGATGCTGTCGATAAGATCTTGGAAATTATTGTCGATGAGCATGAAGAAGCTGCTAGAAATAATGAACATAAAATGCATGAAAGGGATTTTGTTGATGTATTATTATCAGTAAATGGAAAGTCTTCAAATACACATGATGATCTATCACACATGATTGATCGAAATAGCCTCAAAGGAATCATAGTAGACATGATTGCAGGAGCTATTGATACTTCACATACGGCAATTGAATGGATCATGACAGAACTCATAAGGCATCCGAGAGTCATGAAAAAACTTCAAGAAGAAGTTAAGAATGTCGTGGGAGACAATGAAATCGTTGAGGAAACGGATTTGGTCAAGTTTAAATATCTGGATATGGTGATTAAGGAA…	LTRRCMANRDAVDKILEIIVDEHEEAARNNEHKMHERDFVDVLLSVNGKSSNTHDDLSHMIDRNSLKGIIVDMIAGAIDTSHTAIEWIMTELIRHPRVMKKLQEEVKNVVGDNEIVEETDLVKFKYLDMVIKESFRLHPTVPLLVPRESMEDIVISGYFIPKQSRIFINSWAMGRDADLWSENVEEFLPERFIDKHIDFRGHDFEFTPFGSGRRGCPGMHLGLINTRQIVAQLVHCFDWELPTGMPASDLNMDEKFGLTLPRAKQLCAVPSLRL
AeCYP736A30	Arel.022068	ATGAGAAAGGAGGAGCTTGGATTATTGGTGAAGGAGCTTAAGGATGCCGCCGCTAAATGTGAGGTGGTGGATATTAGTGCAAAGGTGGCTGATCTTATTGAGAACATGACTTATAGGTTGCTTTTGGGACGTAGCAAAGATGATAGGTTTGATCTCAAGGGTATTATGAATGAGGCCTTCCTGTTGGCTGGAAAGTTCAATCTTGCAGATTTTGTGCCTTTCCTAGCCCCACTTGACCTTCAGGGATTGACTCGAAGCTTTAAGGAAGCCGGCAAGAAACTTGACAAAATGTTGGAGCTAATTATTGATGAGCATGAACAAAACGCAAGTAATGGACTTCAAAAGAAAAATACCGACTTTGTTGATGAAATGCTATCATTGATGAAAAATTCCACAAGC…	MRKEELGLLVKELKDAAAKCEVVDISAKVADLIENMTYRLLLGRSKDDRFDLKGIMNEAFLLAGKFNLADFVPFLAPLDLQGLTRSFKEAGKKLDKMLELIIDEHEQNASNGLQKKNTDFVDEMLSLMKNSTSTHHELAKAIDRSSIKSIMVDIITAAIDTSYTSIEWILAELIRHPRVMKRCQEEVNTIVGLDRMVEETDLPKLEYLYMVVKEGLRLHPIAPLLGPHESREDIVIDGYYIPKKSRVIVNAWALGRDPNVWSEDAEEFLPERFTRSKIDLRGRDFQLLPFGSGRRGCPGMQLGLINIQFVLAQLLHCFDWELPSGISTGDLDMTEKSGLTIPRIQHLLLVPKIRI
AeCYP71D13	Arel.033437	ATGGCCCATTCCAATGGGTACAAACTGTACAGTCAAGACTGCCCAGTGCGGCAGTGCCCCTTCAGCACACTTGTGGACACTTGTGACATAGCTGCTAGGAATAATTTTGGTCGGAGAACTACTAAAACTGGAAGAATGTTGGGCTTGTTGGGAAATATTGACATTGAAAAGGAAAACAAAGCAAATGTAATGGTTGAAGAACTTTTAGAAAAGAACGGAAGCAGTATAATGGAGTTCCAATATTCCCTCTTCTCTATCATCACTACTTCCCTAGCCAGCATCCTCTTTTTCTTTGTTTTGATCAATAAGTTATTGAAAAGATCCTCAAAAGTAGCTCATAAACTTCCCCCAGGGCCATGGAAGCTACCTCTGATCGGAAATTTGATTCAAGTGGCTGCT…	MAHSNGYKLYSQDCPVRQCPFSTLVDTCDIAARNNFGRRTTKTGRMLGLLGNIDIEKENKANVMVEELLEKNGSSIMEFQYSLFSIITTSLASILFFFVLINKLLKRSSKVAHKLPPGPWKLPLIGNLIQVAASNPIPHRGLLELSRKHGPLMHLQLGKIPAIVVSSPRVAKEVLRTHDLACADRPDMLLGKIMLANSRDIVLAPYGDYWRQMRKISTSELLSANKVRSFRNVREEESWQLIDSIRSSLGSPINYSTKVTGMANAIICRATIGKKCKYQDELIEVVEDIAYWGSGFFMADLFPKLKFLEYITGMRPKLEDMRRKLDHIFGHIINEHREKLASRNEQNIHDTDEDLIDVLLRINESQRLEFPITSNDIQGITLDMFTAGTDSTSATLQWI…
AeCYP71D14	Arel.032701	ATGGTAGCTATAATGGCTCTCCAATACTCCCCAAACTCAATCATCTTTTCCCTCATTCTCCTCACCTTTTTCCTGTTTAAGTTAGCCAAGGAACTGAAAACATCCAAAACTCAAAAACTCCCCCCTGGGCCATGGAAGTTACCTGTCATTGGAAATATGCTCCAATTGGCTGGTACACTACAAACACATAGCCTCAGAGACTTGGCCATGAAATATGGACCTGTCATGAGCCTACAACTGGGCGAAGTTTCTGCCGTTGTTATATCATCTGCTCGAGTAGCAAAAGAGGTTTTGAAAACTCACGATATTGCCTTCGCAGACAGGCCAAGGGTTATAGCCAACAACATTATTTTGCGCAACGGTAAAGACTTGGTTTTTGCCCTCTACGGTAACTACTGG…	MVAIMALQYSPNSIIFSLILLTFFLFKLAKELKTSKTQKLPPGPWKLPVIGNMLQLAGTLQTHSLRDLAMKYGPVMSLQLGEVSAVVISSARVAKEVLKTHDIAFADRPRVIANNIILRNGKDLVFALYGNYWRQMRKICTVELLSANKVSFFRSIREEEAWRLVQSVQSSLASPINLTKRFLSLTNAVTCRATIGKKSQYQDELIQLIEDTASLAGGFDISDLFPSIKLLHVLSRMKPKLQTIRRKLDKIIDNIILEHKENWESTNKGDSLEGEEDLVDVLLKVQKRGGLEFPITADDIYGIIVNMLIGGTDTSATALEWAMSELMRNPQVLEKAQAEVRQALKGKTTIHETDIQGLSYLKLVIKETLRLHPPLALLLPRKCREECKIDGYHIPINTK…
AeCYP72A22	Arel.012506	ATGAGATTTTTGCCAACCAAAAGAAACAAAAGGATGAAAGAGATCGCCAAAGAAGTGAAACTTGCACTAAAAAGTATCATCAACAAGCGTTTGAAGGCAATGGAAGCTGGAGAATGTAGTCATGACGACTTATTGGGTATATTATTGGAATCCAATTCCAAAGAAATTAAACAACACGGTAACACGAATTTTGGACTGACTATCGATGAGGTTATCAAAGAGTCATCAAGTTTGCGGGTATTTGGAAACAATAAACCAGATTTTGATGGATTAAATCACCTTAAAGTT	MRFLPTKRNKRMKEIAKEVKLALKSIINKRLKAMEAGECSHDDLLGILLESNSKEIKQHGNTNFGLTIDEVIKESSSLRVFGNNKPDFDGLNHLKV
AeCYP72A23	Arel.012520	ATGGATGCAGTAATTGCAGCGGCAGCCGCAGTGGCTGCTGTTGTTTTTGTAGGATGGGCATGGAAGGTGTTGAATTGGGTGTGGGTGAGTCCACGAAAGCTAGAGAAGTCCCTCAGAAAACAAGGATTCCGTGGAAATTCATACCGTCTGTTTCATGGGGACCAGAAAGAAAACTCGGAAATGACGAGGAAAGCTATGTTAAAGCCCACCAATCTCTCTGATGATATTGTGCTGCGGCTCAGGCCCTTTATCCATCAAACCCTCCAGAAATACGGTAAGAAATCCTTTATATGGATTGGACCGACGCCAAGGGTGCACATCATGGACCCTGAAATTATTAAAGAAATAATGGTTAAGAGTTACAAATTCAACAAGCCCAAGAGGAACCCACTAGTCAAG…	MDAVIAAAAAVAAVVFVGWAWKVLNWVWVSPRKLEKSLRKQGFRGNSYRLFHGDQKENSEMTRKAMLKPTNLSDDIVLRLRPFIHQTLQKYGKKSFIWIGPTPRVHIMDPEIIKEIMVKSYKFNKPKRNPLVKLFADGLANHEEDLWAKHRKLLNPAFHQEKLKCMVPDMYLSCIEMVSKWEKMISEDGSSCELDVWPFLQRLTSDVISHTAFGSSYEEGNIVFELQTEQAVLVMKTLQSVYIPGWSYLPTKRNRRIKEIDRKTQSCLMNIINKKTEAMQAGEASTDDLLGILLESNLKEQLGQGNKNVGMSIQEVMGECKQFYFAGQETTSGLLVWTMVLLSIHPDWQKRAREEILQEFGNEKPDFDHLNHLKIVTMIFYEVLRLYPPVDMLLRRVDQ…
AeCYP78A6	Arel.023112	ATGAAGCACTCTACTCTAATCATAGCTCTTATAACTCTCTTCTTATTCCTATGTTTTGGAGCTACTTTTAATAATAATTACCAAACTCAACATTGGCCTCTCGCTTTCCTACTAGTCCTCTCTTTTTCCTCCCTCTTTCCCTTCTTCTTGAACCTATGGCTGGTCCCAGGAGGCTTTGCATGGAGAAATTACCATTTCCCAAACCCTACAAAACTCTGTGGCCCTGTAGGTTGGCCCTTCTTGGGGACCTTACCTCAAATGGGTCCTCATGCTCACCAAAAACTAGCTACCATGGCTTCATCATTTCGAGCCACTCGGCTCATGGCATTTAGCCTCGGCTCGACTCGGGTGCTCATCAGCAGTCACCCGGAGACCGCAAAGGAAATCCTTTGTGGGACA…	MKHSTLIIALITLFLFLCFGATFNNNYQTQHWPLAFLLVLSFSSLFPFFLNLWLVPGGFAWRNYHFPNPTKLCGPVGWPFLGTLPQMGPHAHQKLATMASSFRATRLMAFSLGSTRVLISSHPETAKEILCGTSFSDRPIKESARLLMFERAIGFSPSGKYWRNLRRIAANNMFSPRRIAGLEGIRQVVADEMTEGVLNIEGGVVGVREILQKASLRNVMESVFGGSLGIKGEELGFMVKEGYELIAEFNWGDYFALGFLDFNGVKRRCHKLGVKVGGVVGEVIRERKREGEIIISGRNDFLSVLLSLPKEDQLCEADMVAVLWEMIFRGTDTVAILLEWTLARMVLHPDIQAKAQQEIDTCVGNLRHVQDSDIPNLRYLQSIVKEVLRLHPPGPLLSW…
AeCYP716A11	Arel.003372	ATGGAACTCTTCTATGTCCCTCTCCTCTCCCTCTTTGTTCTCTTCATCTCTTTATCATTCCACTTCCTCTTCTACAAGTCCAAATCCAGCTCCTCCGGCGGGCTTCCTCTCCCGCCGGGCACGACCGGGTGGCCTGTTATCGGAGAAAGTTACGAGTTTCTCTCCACAGGGTGGAAAGGCTACCCGGAAAAGTTCATATTTGACCGTATGACCAAATACTCCTCAAATGTCTTTAAGACCTCTATATTTCGAGAGTCCGCCGCAGTTTTCTGCGGCGTAGCTTGTAACAAGTTCTTGTTCTCAAACGAGAACAAGCTTGTTCAGTCCTGGTGGCCTGACTCCGTAAACAAAGTTTTTCCTTCTTCAACTCAAACCTCTTCGAAAGAAGAGGCGATTAAG…	MELFYVPLLSLFVLFISLSFHFLFYKSKSSSSGGLPLPPGTTGWPVIGESYEFLSTGWKGYPEKFIFDRMTKYSSNVFKTSIFRESAAVFCGVACNKFLFSNENKLVQSWWPDSVNKVFPSSTQTSSKEEAIKMRKLLPNFLKPEALQRYIGIMDQIAARHFESGWENKNEVVVFPLAKSYTFWIACKVFVSVEEPTQVAKLLEPFSAIASGIISVPIDLPGTPFNSAIKSSKIIRNKLVGIIKQRKIDLGEGKASPTQDILSHMLLTSDESGKFMTEGDIADKILGLLIGGHDTASSACTFVVKFLAELPEIYEGVYKEQMEIVKSKKPGELLNWEDIQKMKYSWNVACEVLRLAPPLQGAFREALTDFSYNGFSIPKGWKLYWSANSTHRNSEVFPE…
AeCYP72A24	Arel.012513	ATTCTTCTTAATGCTACTTGGGTCTTGCCATCTTCAACCCATTCTGCAGTTGTAGATTTCTGTAGTAACTTTGACTTTACATATCCATGCGATCCAGCTTCTTCTGATGCTATTTATTGGGATGGTGCTAATATTAATAATGCTCGGACCGCTTTCATTTGGGAATCTATAAGGCAGAGGGGTCAACCCAAGGCCTGGTATAAAACTGTGTGGCACCAAAGTATTCCTCCGAGGCACTCTTTTTTCCTCTGGCTGGCATACAATCGTGGCCTAAGAACCAAGGACAGATTGATTAACTATGGTCTCACGGTTGATCCACAGTGTGCTCTGTGCAATTCTGGTTTTGAAAGCTTTGATCATCTTTTTTTCCAGTGCCCCTTTTCTTTTCATGTCCTTACC…	ILLNATWVLPSSTHSAVVDFCSNFDFTYPCDPASSDAIYWDGANINNARTAFIWESIRQRGQPKAWYKTVWHQSIPPRHSFFLWLAYNRGLRTKDRLINYGLTVDPQCALCNSGFESFDHLFFQCPFSFHVLTSVLRVCGWRGFSRRWEDLSHFLHARSSTGIPSSLLHLGFAALIASLCAIVVVLLGWRIFNWVWLRPRKLEKYVRNQGFNGNSYRLFFGDLKDMVAMMKEAKSKPINLSDDIVPRIMPLNHKTIQTYGKNSFLWLGPIPMVHIMDPDHIKEILTKFYQFQKHRGGNPLIRLLATGLADAEGDRWAKHRKLINPAFHLEKLKVISSLSYLVPHFLYIVNIILFFEFFSMQNMVPAIYLSSSEIMTKWEKMVSTKGQIELDVWPYLETL…
AeCYP81D3	Arel.002493	ATGCAGGTTTTACTACATGCAGGAACTGATACGTCAGTTGGGACAATGGAGTGGGCAATGTCCCGTCTCCTCAACAATCCAGAAATTCTAAAAAAGGCACAAACTGAAATAGACAATCGTGTTGGACAAGACCAGCTGATCAACGAATCGGATTTAGGGGAGCTCTCTTACCTTCGTTGCGTCATCAACGAAACTCTACGTATTCACCCAGTGGCCCCACTATTAATACCTCATGAATCATCAGAGGAATGCAGGGTAGGAGGTTATCGAATCCCTAGCGGGACTATGTTATTTGTTAACTTATGGGGCATACAAAATGACCCAAAGGTATGGGAAGACCCCGGAAAATTCAAGCCCGAGAGGTTTGAAGGAATTGAAGGGACTCGAGACGGGTTCAAA…	MQVLLHAGTDTSVGTMEWAMSRLLNNPEILKKAQTEIDNRVGQDQLINESDLGELSYLRCVINETLRIHPVAPLLIPHESSEECRVGGYRIPSGTMLFVNLWGIQNDPKVWEDPGKFKPERFEGIEGTRDGFKLMPFGSGRRGCPGESLAMRMVGLVLGSLMQCFDWERVGKDMEDMTEGTGVTVSKAKPLLAKCRLRPSIASLVSEN
AeCYP82C4	Arel.022827	ATGAGGATCATCAGTACTCATGCCAGAAGCAACAAGGGCAATTCCAGACCTCCAGAACCTACTGGGGCATGGCCTTTTATTGGCCACCTTCATCTTCTAGGAGCAAACAAGATATTACATCATACCCTTGGAGCCATGGCCGATAAATATGGACCCATCTTCTCGTTGCAACTAGGGATTCACAGCACACTAGTGGTTAGTAGCTGGGAAGCTGCAAAAGAATGCCTTACAACCCAGGACAAAGCTTTCTCTAACCGTCCAAAATCTCTGGCCATAAAGATCATGGGATATGACCATACCATCCTTGGATTTCTGCCTTATGGAACATATTGGCGTGATATGCGTAAGCTAGCAATAGTTGAGCTTCTATCCACCCGTCGACTTGATATGCTTAAGCAT…	MRIISTHARSNKGNSRPPEPTGAWPFIGHLHLLGANKILHHTLGAMADKYGPIFSLQLGIHSTLVVSSWEAAKECLTTQDKAFSNRPKSLAIKIMGYDHTILGFLPYGTYWRDMRKLAIVELLSTRRLDMLKHVRESEVNIFIRELYEQWISNEGCGSKVVVELKQRFGDLAMNIVVRMVAGKRYFGTGVHGDEESRRCQKAIGNFMHLVGLFMVSDAVPLFGWVDALRGYTGEMKKTAKEIDHVLGSWVKEHRQKRECRSIDESEQDFIHVMLSVMDGSQFAEYDTNTSIKGTCLGLIAGGYDTTTITLTWALSLLLNNRHVLQKAQDELDIHVGRDRQVNESDVKNLTYLQAIVKETLRLYPAGPLSMPHEAMEDCTVASFNIPAGTRLLVNLWKLH…
AeCYP749A4	Arel.023400	ATGAGTTCACAAGGAGTGAAAGGCCTACCTTACAGTTTTCCACATGGAAACACCAAAGTTATCTCCAGCATGAGAAGCGAAACCATGGGGTATTCAATGGGAATTTCTCATGATATGTTCCCAAGGATTCAACCCCATGTGTATTTGTGGACAAAGATCTATGGTACTAATTTTATTAGTTGGCATGGTCCACAAGCTCAGTTGTTTGTTACAGAACCGGAGCTTATCAAAGAAATACTGAATAATAAAGAAGATGCTTATCCGAAAATGGAGATGGAAGGATATGCCAAGAAGCTGTTAGGGGAAGCACTCATAACAAATGAAGGTGAAAAATGGGCAAAGATACGAAAACTAGCAAATCACACTTTTCATGCAAATAGCTTGAAAGGAATGATTCCA…	MSSQGVKGLPYSFPHGNTKVISSMRSETMGYSMGISHDMFPRIQPHVYLWTKIYGTNFISWHGPQAQLFVTEPELIKEILNNKEDAYPKMEMEGYAKKLLGEALITNEGEKWAKIRKLANHTFHANSLKGMIPEMSASVETMLERWRDYEGKEIDVYKEFGVLTTEVISRTAFGSSFSEGSHIFEMVAKLTAITVRNIYKTRFPGFSRIMKTNDDIEAEKLEKGIKNSILDLVNKRDQKVKNGEADDFGSDYLGQLVKIANDSDEKKRITLEQMVDEIKALYGAGHLTTTNLLAWTVFLLAIHTDWQDKARKEVVEHFGKENPTSDGIARLKNMNMIINESLRLYPPDVHDFKPERFAEGVAKATNNNAAAFVPFGMGPRTCVGMNFLNWYGPQAQLVV…
AeCYP714C10	Arel.019156	ATGAAAAGGGCAAAGAAATATTTCATAAGCTTAATTAGAATACTTCAGGAGGCTACGTCTGCCAAACTTATGTCTGTTGGGATTCCTGGAATATCCTTCTGCAATTGGTGCCTAGTGCTCCTGGCTGCTGATCAACAATGGCAAACTCGTGTACACGATGAAGTTTTCCAAATTTGTGGAGGCCAAACTCTAGATGCTGATATGCTTCGAAAAATGAAACAGTTAACCATGGTGCTTCAAGAAACTCTGCGCCTCTACCCTTCTGGACCTGCATTATCAAGGGAGACCTTGAAGGACATGAAGATTGGTGGCGTAAACGTACCCAAGGGTGTCAACCTTTGGACCATGGTGGTGACAATATGCATACGGACCTCGAAATATGGGGACCTGACGCGCTCA…	MKRAKKYFISLIRILQEATSAKLMSVGIPGISFCNWCLVLLAADQQWQTRVHDEVFQICGGQTLDADMLRKMKQLTMVLQETLRLYPSGPALSRETLKDMKIGGVNVPKGVNLWTMVVTICIRTSKYGDLTRSSLIQKGQHLAMVELIRMLIAALVSNFSFILPPNYVHSPALKLVIKPGYI
AeCYP736A31	Arel.031183	ATTTCCATTTTCAGTTATGTTAGCTATTACTGTTTTGATCTCTTACAAAATCTCAAAATTACCTTTGATCAGGGATTGACCCGAAGAATTAAAGATACTAGCAAGAGTCTTGATAGAATCTTGGAGACCTTCATCGATGAGCATGAAGAAAAAGCAAGAAATGGAAATTCAACACACAATAAGGACTTTGTCGATGAAATGCTATCATATACTCACAATGAGCTTTCAAAAGTAATTGATCGACCAACCATTAAAGCCATCATGATTGATATAATCGCGCCAGCTATCGATACTTCATTTACCTCTATTGAATGGATCTTAACAGAACTCATAAGGCATCCGAGGGTGATGAAGAAGTGTCAAGACGAGATACATGCAATTGTAGGAGTTGACCGAATG…	ISIFSYVSYYCFDLLQNLKITFDQGLTRRIKDTSKSLDRILETFIDEHEEKARNGNSTHNKDFVDEMLSYTHNELSKVIDRPTIKAIMIDIIAPAIDTSFTSIEWILTELIRHPRVMKKCQDEIHAIVGVDRMVEETDLPKMNYLYMVIKEGLRLHPVTPLTGPRESMADIVRNGYHIPKKSRVIVNTWALARDPNIWSENAEEFFPERFEGSSIDLRGLDNFQLIPFSAGRRGCPGMQLGLITVELVLVQLVHCFDWKLPSGTSPNMLDMTENFGLTSARVQHLLAVPTYRL
AeCYP71D15	Arel.014563	ATGATCAAAGCTGGAAAAACAAATTTAGTCCAAAAGAAAATGCCACCGGGGCCATGGAAATTGCCGCTTATCGGCAATTTACTCCAAATGATCCTTTCAGGCTCAACAATACCACACCATATTCTAGCCAAATTAGCCAAGAAGTATGGACCTATCATGCACCTACAAATAGGTGAAATGTCCACTATAGTCATTTCCTCCCCAGAAGCAGCTCAAGAAGCCTTTACTACCCATGACCTTACCTTAGCACAAAGGCCACAAAATATTTTCTTAGACAACATGACCTATAACAACTCTGGTGTTGCCTTGTCTCCCTATGGAACTCACTGGAAAATTCTTCGCAAAATTTGTATTGCCAAGCTACTAAATCCAAAGCACGTCCAGTCGTTCAAATCCATT…	MIKAGKTNLVQKKMPPGPWKLPLIGNLLQMILSGSTIPHHILAKLAKKYGPIMHLQIGEMSTIVISSPEAAQEAFTTHDLTLAQRPQNIFLDNMTYNNSGVALSPYGTHWKILRKICIAKLLNPKHVQSFKSIREEEVYNFINSISSSSRHDGAINLTSKLLGLNNCIISRATFGKRISKDYLDDEFVSLLNKLMELGRAYLVYQIFPSLKFVHGLTGLRAASENIHIPMDKILQNILDEHKAKREAAGVSSSGIDSESGEENLVDVLLGLQACVDLQFPVTTDAIKAVILDMLLAGIENPSITIEWAMAELLKNPRAMEKAQAEVRQAIKKKKRIEETDIQELKYLKSVIKETLRLHPPLPAMIRESRDRFEIQGYEILGSTKVIINAWAVGRDPKYW…
AeCYP87D1	Arel.015431	ATGGTTTCCAAAACTCTTGCAAATTGGTCAAGTCAAGAATCCGTCGAAGTGAAAAGCGCATCTATTACGATGAGTATTGATTTTGCTGCAAGGCAGTTGTTTAGTGGTGATGTTGAAAATGCTCCATTGAAGTTGAGTGATATGTTCAATGACCTAGTAGAAGGCCTAATGTCCTTTCCATTGAACATTCCTGGTACTGCACATCATAAATGTTTGAAGATTCACAAGGAGGTGCGGAAAACCATGGGCGATGTGTTGAGAAAGAGGCAAAACTCGCCTGATCAGGAGCGTCACGATGACTTGCTTGATCACCTCATACAAGACATGAATACAGAGGCATTCTTGACTGAAGATTTCATTGTTCAACTAATGTTTGGCCTTTTATTTGTAAGCTCAGAT…	MVSKTLANWSSQESVEVKSASITMSIDFAARQLFSGDVENAPLKLSDMFNDLVEGLMSFPLNIPGTAHHKCLKIHKEVRKTMGDVLRKRQNSPDQERHDDLLDHLIQDMNTEAFLTEDFIVQLMFGLLFVSSDSISTTLALAFKLLAEHPLVLEELTAEHEAILKNRDNLESVLTWDEYKSMTFTRQVINEVLRLGNIAPGLFRRALKDIPVNGYTIPAGWVIMIATSALHLNEDEFNNPLEFNPGRWKNIQPSVVAKSFMPFGVGMKQCAGAEYSRVFLASFLHVYKGVERAADLDGRITYGQISKEGIFPLKKKRPYPSYIN
AeCYP72A25	Arel.015192	ATGATGAACAACTTAATTGCAGCCTTTGGTTTCATTCTTCTTCTTGTGATAATATCTGTATGGAGAGTTTTGGACTGGATTTGGTTTAGACCAAAGAAGCTTGAGAAACTCCTGAACCAGCAGGGCCTCAAAGGCAACTCTTATAGCCTACTGGTGGGAGACCTGAAGGACGGATTGACGCTTATCAAAGAAGCCCATTCCAAGCCCATTAATCTGACGGATGATATTGTGCCTCGTGTCCTACCGTTGCCCTACAACACCATCTCAAAGTATGGTAAAAATTCTTTTTCCTGGTTTGGACAGATACCAAGCGTATACATCACTGACCCTCAGCTGGCACTTGAAGTCATGATCAAATTTGATAAGTTTCAAAAATATTTTAAAACAACTAATCCACTG…	MMNNLIAAFGFILLLVIISVWRVLDWIWFRPKKLEKLLNQQGLKGNSYSLLVGDLKDGLTLIKEAHSKPINLTDDIVPRVLPLPYNTISKYGKNSFSWFGQIPSVYITDPQLALEVMIKFDKFQKYFKTTNPLIKRISEGLLTLEGEKWSKHRGILNPAFQLEKLKHMLPAFHTSASDMVSKWEKMVSTEGSGEIDIWPHLETLSADAISRTAFGHSYLQGRKIFKLQREQAKLCMEAMRSVYIPGSRFLPTKRNTRMKQIEREVRDLIMHMINERIKAMKEEAIPDDLLSILLKSNFEQAQHGKNSGMSMQDIIAECKLFYFVGQETSSSLLLWTMILLSKHPIWQAEAREEVLKVFGNEKPNYDGISRLKVVNMILNEVLRLYPPVIELTRIVRKEM…
AeCYP71D16	Arel.026739	TCATTTGTCTCAAAAAGATTGCCCCCAGGGCCATGGAAGTTACCCCTAATTGGAAACCTGCACCAAATGATGGGCTTAGGCTTCGTCCCACACCGCATTCTTACAAATCTCTCCAAGAAACATGGACCCATTATGCATCTCCAGGTAGGTGAAATGTCCATGGTAGTCATCTCTTCCCCAGAAGTAGCTCAGCAGACCTTAACCACCCATGATCTTGCCTTTGCACAAAGGCCACAAAATGTTTTCCTCGAAAATTTAACCTATAATAACTCTGGAGACGTAATGATGATGATATTAATGTTGTCAACCTTAGTAGCAAGATATTGGAGTTTTGGTGAAAAGATTAGCAATAATGATCGAGATGAGTTCATACCACTGCTCAACTGGCTAATGGAGCTT…	SFVSKRLPPGPWKLPLIGNLHQMMGLGFVPHRILTNLSKKHGPIMHLQVGEMSMVVISSPEVAQQTLTTHDLAFAQRPQNVFLENLTYNNSGDVMMMILMLSTLVARYWSFGEKISNNDRDEFIPLLNWLMELGGTFMIYQIFPSLKFVHHLSGLKAVSEYIFGRMDKILQNLVDGHKATSRDPDDAEGGEDNLVHMLLKHQARVDLGFSITTNTIKAVILDMITAGIENPATTIEWAMAELLRNPRVMHKAQTEVRQLLNKKNKHKNQETDIQELTYLQSVIKETLRLHPPIPEIPRECRESCEINGYTIPAKTKVIINTWAIGRDPKHWIDADCFYPERFLDSTIRSFEYIPFGGGRRMCPGMLFGMACVELPLACLLYHFDWKLQDGIKPEQVDMS…
AeCYP736A32	Arel.031603	ATGTTCAAATTATTTCAGGGATTGACTCGACGTTTCAAGAGTTGTAGCAAGGCTATTGACAAAGTCTTGGAGATTATTATCAATGAGCATGAAATTGATGCTACTGATACGCATAAAGGTCTTGACAGGGATTTTGTGGATGTGATTCTATCTTTGAAAAACAAGTCTACAAGTACTCAAGACAAACTATTCTCCACAATTGATAGAACAGATATGAAAGCAATCATACTAGATATGATCATCGGAGGAATTGATACCTCGCATATTTCAATCGAATGGATCATGTCAGAACTCATAAGGCATCCGAGGGTGATGAAACGACTTCAACAAGAACTTAAAACCGTTATGGGAGATAATGAAATGGTGGAAGAATCTCATTTGTCTAAGTTAGAATACCTA…	MFKLFQGLTRRFKSCSKAIDKVLEIIINEHEIDATDTHKGLDRDFVDVILSLKNKSTSTQDKLFSTIDRTDMKAIILDMIIGGIDTSHISIEWIMSELIRHPRVMKRLQQELKTVMGDNEMVEESHLSKLEYLDMIVKESIRLHPANPFLVPRESMEDIVIDGYYIPKKSRILVNNWTLGRDPNAWSENVEEFLPERFTARNINIQGHNFQLIPFGSGRRVCPGVHLGLINVKLVVAQLVHCFDWELPIGKSPTELEMDEKFGLTLPRVNHLLAIPILRL
AeCYP736A33	Arel.031171	GGATTGAATCGGCGCCTCAAGACAACGAGAAAGGCTATTGACAAAATCTTCGACTCTGTAATCGATGAGCATGAACAAGATGCTAGTAGTGGGAATAGAAGGCTTGATATGGATTTTCTTGATGTGATTCTATCTTTGAAAAAAAATTATTCAAGTACCCATGATCAATTATCCAACAAAATTGATAGAACAAATATCAAAGCAATCTTATTAGACATGATATTTGCAGGCATCGACACCTCGCATACTGCCATTGAATGGACAATGTCAGAACTCATAAGGCATCCGAGGGTGATGAAACGGCTTCAAGAAGAACTTAATGCTATTGTAGGAGATAATGAAATGGTGGAAGAAGCTTATTTGCCCAAGTTAGAATACCTAGACATGGTAGTTAAAGAA…	GLNRRLKTTRKAIDKIFDSVIDEHEQDASSGNRRLDMDFLDVILSLKKNYSSTHDQLSNKIDRTNIKAILLDMIFAGIDTSHTAIEWTMSELIRHPRVMKRLQEELNAIVGDNEMVEEAYLPKLEYLDMVVKESLRLHPVAPLLVPRESMEDIVINGYYIPKKSRIIVNDWGLGRDINVWSNNVLEFLSERFIGRNIDLQGQHFQLIPFGSGRRGCPGTYLGLINIKLAVAQLVHCFNWELARRLMSWTWMNILVYHYQEQSLYLQYLLFEYEKVCLKTSILLYCLNWFALSS
AeCYP736A34	Arel.031155	ATGCATCATTCTGTTGACAAAATCTTGGAGATCATTATTAGTGAGCATGAAGAAGCTGCTAGGACTAGACAAAAGGGGCATCATGAAATGGATTTTGTTGATATATTGCTATCATTAATGAACAATTCCACAAATAGACATGATGAATTATCGCGCATAATTGATCGATCAAGTATCAAAGGAATCATGCTAGATATGATTGGAGCAGGTATAGATACTTCAAATACAGCAATTGAATGGATCATGACAGAACTCATAAGGCACCCAAGAATCATGACAAAACTTCAAGAAGAAATTAAGACTGTTATAGGAACTAACGAAATTGTGGAGGAGACGGATTTAACTAAATTCAAATACCTAGATATGGTGATTAAGGAAAGTTTTAGGCTACATCCAGTT…	MHHSVDKILEIIISEHEEAARTRQKGHHEMDFVDILLSLMNNSTNRHDELSRIIDRSSIKGIMLDMIGAGIDTSNTAIEWIMTELIRHPRIMTKLQEEIKTVIGTNEIVEETDLTKFKYLDMVIKESFRLHPVVPLLIPRESMEDIVVNGYHISKGSRVFINSWALGRDPGVWSENVEEFIPERFIGKNIDFKGHDYEFLPFGSGRRVCPGMHLGSINVRQVVAQLVHSFDWELPTGMSVCDLNMDEKFGLTLPRENSLGAVPSFRL
AeCYP76A5	Arel.032187	ATGGAATGGTTTTCGTTCCTTGTTTTTTGGTCCATTATTATTTTGTCACCTGCGTTGGTTCTCTTCTACCACCGCCGGAAGTCTCACTCGAGCCGCCTACCTCCGGGGCCACCCAAATGGCCATTGTTTGGTAACATGTTTGATCTTGGAACCATGCCACATAGAGCTCTTGCTGGGCTAGAAAAACAATATGGCCCTGTGGTTTGGCTAAGGTTTGGCTCCGTAAATTCCATGGTTGTTCAAACAGCGCAGGCTGCAGCTGAGTTGTTTAAGAACCATGATCTCTCCTTTGCAGATCGAAACATTATCGACACCATGCGGTCACACGACTACCACAAAAGCTCCTTAGCCCTTGCCCCGTATGGCTCGTATTGGCGCGTTTTAAGGCGGATATGCACC…	MEWFSFLVFWSIIILSPALVLFYHRRKSHSSRLPPGPPKWPLFGNMFDLGTMPHRALAGLEKQYGPVVWLRFGSVNSMVVQTAQAAAELFKNHDLSFADRNIIDTMRSHDYHKSSLALAPYGSYWRVLRRICTVEMLVNKRMNETAGVRQKCINNMVHWIQKEARELKGARGIHVTRFVFLTSFNLLGNLMLSRDLVDPESKAGSEFFTAMMGLIDLWGDHANISDVFPWLRRFDLQGLRKKTDRHMKKTLGIASEFVKERVQQKQQQLQGPERTKDFLDVLLEFEGSGKDEPPKLLEQDINIFILELFMAGAETSSSSTEWALTELLRSPEKMIKVKAELAKVIGPNRKFEESDVDNLHYLQAVVKETLRLHPPIPLLIPRKATQDTEFMGYRIPKNT…
AeCYP736A35	Arel.031147	GGATTGACTCGACGTTTCAAGGCACTGCACAAAGATCTTGACAAAACCTTGGAAAAGATTGTTAATGAGCATGAAGAAGCTGCTACTAGTGGAAGTAAAAAGCTTGACCTGGATTTCGTCGATGTACTACTATCATTATTGGATAAATCTTCAGAAAATACTTATGCTGAGCTATCACACATGCTAGATAGAAGAACCCTAAAAGGAATTATAGTAGATATGATAGCAGCCGGTATTGATACTTCACACGTTGCAATTGAATGGATCATGACTGAACTCATAAGACATCCGAGGATCATGAAACAACTTCAAGAAGAAATTAAGAGTGTTGTTGGAGTTAATGAGATTATAGAGGAGACTGACTTGACTAAGTTTAAGTACCTAGACATGGTGATTAAA…	GLTRRFKALHKDLDKTLEKIVNEHEEAATSGSKKLDLDFVDVLLSLLDKSSENTYAELSHMLDRRTLKGIIVDMIAAGIDTSHVAIEWIMTELIRHPRIMKQLQEEIKSVVGVNEIIEETDLTKFKYLDMVIKETFRLHPVVPLNIRESMEDIVINGYYIPKKSRVLINSWTLGRDPDVWSENVVEFIPERFIAGVDFFGHDYKFLPFGSGRRICPGMHLGLINVRQIVAQLVHCFDWELPNGMSLGDLNMDEKFGLTLPRAQHLLAMPVRRL
AeCYP716A12	Arel.025446	ATGAAATATTCATGGAGTGTTTGGTGTGAAGTTTTAATGATTAGACCACCAACTATTGGAGCAGTTAGAGAAGCAGTTGCAGATTTCACCTATGGTAGATATACTATTCCCAAGGGATGGAAGTTATATTACGTTCAAAATATCACTCACAAAAACCCCGAATTCTTTCTAAATTCGGATAAATTCGACCCATCAAGGTTTGAAGGAAGCGGACTGGCTCCATTTTCCATTAGGAGGAGATCCAAGAATGTGCCCCGGGTCGGAGTATGCACAAGCAGAATCACTAGTGTTCATTCATAA	MKYSWSVWCEVLMIRPPTIGAVREAVADFTYGRYTIPKGWKLYYVQNITHKNPEFFLNSDKFDPSRFEGSGLAPFSIRRRSKNVPRVGVCTSRITSVHS
AeCYP710A1	Arel.027763	ATGGAGACAATTTGGGGCATTATCTCTTCCACGACTGCATATCTCCTCCCTCTCCTAACTTTCCTAATCTTCTTAGAACAAATCACTTACTTCAAAAAGAAAAGCTCAATTCCAGGCCCATCACTAATCTTACCTTTTCTTGGCAACGCCATTTCTCTTGTCCGTAATCCAACTTTATTCTGGGAAGTTCAGTCTGCTTTTGCCAAATCCTCCCAACACGGCGTCTCCGCCAACTACATAATCGGAAAATTCATCGTATTCATCCGGTCTACTGATCTATCCCATAAGATCTTCGCCAATGTCCGTCCTGATGCCTTTCATTTGGTGGGTCACCCTTTTGGGAAAAAGCTCTTTGGCGAGCACAACCTTATCTACATGATGGGTCAGGATCATAAAGAT…	METIWGIISSTTAYLLPLLTFLIFLEQITYFKKKSSIPGPSLILPFLGNAISLVRNPTLFWEVQSAFAKSSQHGVSANYIIGKFIVFIRSTDLSHKIFANVRPDAFHLVGHPFGKKLFGEHNLIYMMGQDHKDLRRRIAPNFTPRALSTYTNLQQSIILKHLASWLDVAKSKSPESIPLRILSRDMNLETSQKVFVGPYLTPESRQRFNYDYNFFNVGLMKLPIDLPGFAFRNARLAVSRLVETLGGCAEESKAKMKAGEEPTCLIDFWMQDTLREIAAAEAAGEPTPPHSGSIEIGGHLFDFLFASQDASTSSLLWAVTLLDSHPEVLDRVRREVAGIWSPESDKLITAEQLREMKYTEAVAKEVIRIRAPATLVPHIAGEDFPLTADYTIPKGAIVF…
AeCYP736A36	Arel.022077	ATGAGAAAGGAGGAGCTTGGGTTATTGGTGAAGGAGCTTAAGGATGCCGCCGCTAAATGTGAGGTGGTGGATATTAGTGCAAAGGTGGCTGATCTTATTGAGAACATGACTTATAGGTTGCTTTTGGGACGTAGCAAAGATGATAGGTTTGATCTAAAGGGTATTATGAATGAAGCCTTCCTGTTGGCTGGAAAGTTCAATCTTGCAGATTTTGTGCCTTTCCTAGCCCCACTTGACCTTCAGGGATTGACTCGAAGCTTTAAGGAAGCCGGCAAGAAACTTGACAAAATGTTGGAGCTAATTATTGATGAGCATGAACAAAACGCAAGTAATGGACTTCAAAAGAAAAATACCGACTTTGTCGATGAAATGCTATCATTGATGAAAAATTCCACAAGC…	MRKEELGLLVKELKDAAAKCEVVDISAKVADLIENMTYRLLLGRSKDDRFDLKGIMNEAFLLAGKFNLADFVPFLAPLDLQGLTRSFKEAGKKLDKMLELIIDEHEQNASNGLQKKNTDFVDEMLSLMKNSTSTHHELAKAIDRSSIKSIMVDIITAAIDTSYTSIEWILAELIRHPRVMKKCQEEVNTIVGLDRMVEETDLPKLEYLYMVVKEGLRLHPIAPLLGPHESREDIVIDRYYIPKKSRVIVNAWALGRDPNVWSEDVEEFLPERFTRSKIDLRGRDFQLLPFGSGRRGCPGMQLGLINIQFVLAQLLHCFDWELPSGISTGDLDMTEKSGLTIPRIQHLLLVPKVRI
AeCYP83B3	Arel.029652	ATGGCCTTAATTCCTATAATAGCAATCCTAGTTCATAAACACAGAAAAAATGAAGGAAAACTCCTCCTTCCTTCTCCGCCTGGTCCTCCTGGGCTTCCTTTCATTGGGAATATGCACCAGTTTAGTTACTCAGCTCCTCATATTTCCCTAACCCAACTTTCCAAAAAATATGGGCCCATTATGTCGATGCGCCTTGGGTCCATTCCAACTGTTGTGGTCTCCTCAGCAAGAATGGCCCAAGAGGTTCTCAAAACCCAAGACCTCGCATTTTGTAGCAGGCCGGCCTTGCGGAGCCAACAAAAGCTTTCTTACAATGGGCTTGATGTGGCCTTTTCCCCATATAATGAGTATTGGAGGGAGATGAGAAAGATTTTTACTCTTCATTTACTTAACATGAAA…	MALIPIIAILVHKHRKNEGKLLLPSPPGPPGLPFIGNMHQFSYSAPHISLTQLSKKYGPIMSMRLGSIPTVVVSSARMAQEVLKTQDLAFCSRPALRSQQKLSYNGLDVAFSPYNEYWREMRKIFTLHLLNMKRVQSFRPIRAEEVSQTIERVSELAKGSKLANLSEIILTLTSSIISRVAFGYDEEWFGRDKFDPFFTETEAMFACFFVSDYFPLLGWIDKLTGMGARLDKNFKDLDRFYQELINEHLDPNRSSKFAQEEDIIDILLQLKNIDKKLSNSSLDLTLDHIKAVLMNILIGGTDTSTSAVVWSMTGLMQNPTAMKKAQDEEVRNFVGKRGKVNEDDLPNLPYLKAVVKEAMRMYPPFPLLVPRETMENCIINVDNNRYQIKSKTLVYVNAW…
AeCYP96A4	Arel.003875	ATGCTACAACGTAGCAATGGAACTTTTCAAGTCAAAGGCGGTTTGCTTGCTAATTACAACATGTTAGTTACTAGTGATCCTGAAAATTTGCACTATGTAATGAGCAATCATTTCTCAAACTATCCAAAAGGACCCGAGTCCAAAAGGATTTTTGATCTTCTCGGAGACATGCTATTCAATTCCGACCATGGTGAATGGAAAAAGGATAGGAAAATGGCTCATGGGCTGTTTGGCAACCGCCGGTTCCACGAGGCTTCTCTCAGGATTAACAAGGAGAGGTTGGAGGATGGCCTAATTCCGGTTCTTGACCATGTTTCCAAACAAGGCCTAGTTGTGGACTTGCAGGATTTGTTTGAAAGACTAATGTGTGATGCTACGTGTCTGATGGTGACTGGTTAT…	MLQRSNGTFQVKGGLLANYNMLVTSDPENLHYVMSNHFSNYPKGPESKRIFDLLGDMLFNSDHGEWKKDRKMAHGLFGNRRFHEASLRINKERLEDGLIPVLDHVSKQGLVVDLQDLFERLMCDATCLMVTGYNPGSLCIGFPQVPMMKAVQNAGEALFMRFVLPEPLWRIQRWLGIGAEKKMSKAKETLDDVAAKYIAMKKEEQMMKELVKPSEGEEGFDALRYYLTDNNAGHNSYSVMRDTIVGLMFVGRGTSSAALTWLFWLISLNPLVESKILQEIKEKLCIDKHEESRTFDVVELNKLTYLHATLLETLRLFPPVPLQRRVAVEFDILPSGHRVNPNTKIVLCSYAMGRMKSIWGEDCLEFKPDRWISEKGGIKLVASNKFVAFSSGPRICPGK…
AeCYP71D17	Arel.032716	ATGGCCCATTCCAATGGGTACAAACTGTACAGTCAAGACTGCCCAGTGCGGCAGTGCCCCTTCAGCACACTTGTGGACACTTGTGACATAGCTGCTAGGAATAATTTTGGTCGGAGAACTACTAAAACTGGAAGAATGTTGGGCTTGTTGGGAAATATTGACATTGAAAAGGAAAACAAAGCAAATGTAATGGTTGAAGAACTTTTAGAAAAGAACGGAAGCAGTATAATGGAGTTCCAATATTCCCTCTTCTCTATCATCATTACTTCCCTAGCCAGCATCCTCTTTTTCTTTGTTTTGATCAATAAGTTATTGAAAAGATCCTCAAAAGTAGCTCATAAACTTCCCCCAGGGCCATGGAAGCTACCTCTGATCGGAAATTTGATTCAAGTGGCTGCT…	MAHSNGYKLYSQDCPVRQCPFSTLVDTCDIAARNNFGRRTTKTGRMLGLLGNIDIEKENKANVMVEELLEKNGSSIMEFQYSLFSIIITSLASILFFFVLINKLLKRSSKVAHKLPPGPWKLPLIGNLIQVAASNPIPHRGLLELSRKHGPLMHLQLGKIPAIVVSSPRVAKEVLRTHDLACADRPDMLLGKIMLANSRDIVLAPYGDYWRQMRKISTSELLSANKVRSFRNVREEESWQLIDSIRSSLGSPINYSTKVTGMANAIICRATIGKKCKYQDELIEVVEDIAYWGSGFFMADLFPKLKFLEYITGMRPKLEDMRRKLDHIFGHIINEHREKLASRNEQNIHDTDEDLIDVLLRINESQRLEFPITSNDIQGITLDMFTAGTDSTSATLQWI…
AeCYP72A26	Arel.012511	ATGGAGTTAATTTCAAGCTTTTGTGCAATTATTGTCGTGATATTAATGGGATGGAGAATTTTCATTTGGGTTTGGTTGAGACCAAGAAAGCTTGAAAAGTACTTGAGAAATCAGGGTTTTAATGGAAACCCGTACAGATTATTTTTTGGAGACCTGAAAGATATAGTTGTGATGATAAAAGAAGCCAAATCCAAACCCATCAACCTCTCTGATGATGATGTTATCCCCCACATCATTCCCCTCAACCATAAAACCATCATAAACTATGGAAAGAACTCATTTTTATGGCTTGGACCAAAACCAATGGTCCATATTATGGATCCTGATCATATCAAAGAGGTCTTGACCAAGTTTTATCAGTTTCAAAAGCCCAGGCATAATCCTTTAACAAAATTGCTT…	MELISSFCAIIVVILMGWRIFIWVWLRPRKLEKYLRNQGFNGNPYRLFFGDLKDIVVMIKEAKSKPINLSDDDVIPHIIPLNHKTIINYGKNSFLWLGPKPMVHIMDPDHIKEVLTKFYQFQKPRHNPLTKLLATGLVDAEGDRWAKHRKLINPALHLEKLKVIYNL
AeCYP76A7	Arel.011985	TTACTCCTATGGGTTGTATGGACCACGGTGACTAGACCTCGCCAGCCTCGCCTTACAGAGGTACGACAGTTGCCACCCGGACCAAGGAGGTGGCCGGTGATCGGAAACATTTTTCAATTAGGTTGGGCAGTACCCCACGAGTCATTTGCCAAATTGGGTCGTAAACATGGCCCCATCTTCACAATATCCATAGGCTCAATGACCACCGTGGTAATCTCATCAAGCGAGGTGGCTCGGGAAATGTTCAAGAACCATGACGTGGTGCTCGCCGGCAGAAAAATATACGAGTCCATGAAAGGGAATTTTGGCAACGAAGGCTCGCTCATAACGGCTCAATATGGAATATGGAGTGGCCTTGGAGCTTCCTTTCCTTGTCCATCATCATATCCTCACTGCCCT…	LLLWVVWTTVTRPRQPRLTEVRQLPPGPRRWPVIGNIFQLGWAVPHESFAKLGRKHGPIFTISIGSMTTVVISSSEVAREMFKNHDVVLAGRKIYESMKGNFGNEGSLITAQYGIWSGLGASFPCPSSYPHCPYYYSIGGGNPALPPGPPGWPIFGHIFNLGSLPHRTLAGLQQQYGPVVWLKLGSINTLVVQNAKSAAELFKIHDLAFADRYDTEALRSHGYNKVAISVSLYNTTWRFLRRLGTVEMFVNKKITETSSIRQKCVNDMIQWIEKEVHEMNGAGVNIVVTRFVFVAVFNILGNIMLSRDLADPRSNMAREFFEATMGIMECAGTPNVSDLLPWLSWLDLQGLRKKMNRDMGKGLHIVSGFLKERLKERHEGRESKRDFLDILLDFEGSGK…
AeCYP749A5	Arel.017592	ATGAGCAGACCCATGGACTTATCACACAACATATTTCCAAGACTTCAGCCTCACCTTTACTCTTGGCTAAACATTTATGACTGGCAAGAAAAAGCAAGAGAAGAAGTTCTCAACGTATTTGGCCAGGAAATTCCAAATTCAGATGGCCTGGCCAAGCTAAAAACGGTGAACATGATCATCAATGAAACACTAAGGCTCTACCCTCCTATCATTTTCTTTACAAGAACTGTTAAAGAGGAAACCAAATTTGGAAAGCTCACTCTTCCAGCCAATGTACACATTGTTGTTCCAACACTAGAACTTCATCATGACGAGAAAATATGGGGAGACGACGCACTTTTATTCAAACCCGAGAGGAGTTGTGTAGGATTGAACTTTGCAACTAATGAAGCAAAGATT…	MSRPMDLSHNIFPRLQPHLYSWLNIYDWQEKAREEVLNVFGQEIPNSDGLAKLKTVNMIINETLRLYPPIIFFTRTVKEETKFGKLTLPANVHIVVPTLELHHDEKIWGDDALLFKPERSCVGLNFATNEAKIALTMILQRYCFTLSPTYIHSPVQILTLRWPAAWSSGNAAASLSFISRIDTDNSILYKAREIETHLRRSKSSLIRRWNNIGVVEMTPIVFQFLLSSLCLFLFVFIKFLNDIWWTPIRLQRVFRQQGIRGPSYRFLYGNTKEILNMRKESMSRPMDLSHNIFPRLQPHFYSWLNIYGKNFLNWYGPRAQFVVTEVDFVKETMTKDQAYPKIDPEWFAKKLIGDGIVTSKGEKWAKHRKLANHAFHAESLKVSLVSLCLFYKSNDEIEA…
AeCYP736A37	Arel.030686	ATGGTGAATATTGGAGACAGAGTTGCCTTAGGAAGAAAGTATGGTACTACTAGTATTGGAGGTTGGGACAAAGGTGGTGGAAAGAGCGAGCTTAAGGAGTTACTGGAGGAGTTTAATGAGTTGTTGGGTGTTTTTATTGTGGGAGATTATATTCCGTGGCTTTCGTGGGTAGAACGTATCAATGGTATGAAGCGCAAAGAAGAGAAATTAATTAAAAGATTTGATGATTTTTTGGAAGGTGTTGTTAAAGATCACATGGTAATAATTGATGACCACACTAATAATATTGGTGCTCAAGACTTTGTGGACATTTTGATTGACAATCAGAAACAAATCACAAGTACTACTGGCTTTTCTATTGACAGAAAAACCATCAAAGCTGTCATCTTGGATATGTTT…	MVNIGDRVALGRKYGTTSIGGWDKGGGKSELKELLEEFNELLGVFIVGDYIPWLSWVERINGMKRKEEKLIKRFDDFLEGVVKDHMVIIDDHTNNIGAQDFVDILIDNQKQITSTTGFSIDRKTIKAVILDMFAAGTDTTTTVLEWAMAELIRNPNIMRKLQAEVREIGRGKSRITEEDLEKMYYLKAVIKETMRLNIPVPLVPRASRQDVKVMGYDIAAGTQVIINTWAIARDPSLWDEPEEFRPKRFLNSPIDFKGLHFEFLPFGAGRRGCPGIQFGSAINELALANLVHKFDFALPGGEKNEDLNMDVVPGLTVHKKYPLLVVATPSGSD
AeCYP35A1	Arel.001957	ATGGAATTTCTTGGGTTTTTGAAAGATGTTGGTTTAGCTATGGTTGTATTTCTTTTGTTTATATTGGCTAGATTGGTATACACCTGTTGGGTTTTGCCTAACCTCGCCTACCGGAAGCTTAGGAAGAATGGACTAAATGGTCCATCTCCAAGTTTTCCTCTAGGAAATATTAGTGATATGATGAGATCAAAGACGGAGATGATGAAGAGCGATTCGTCGTTGTCTTTAAGCAGCATCACCCATGATATTCATTCCATTGTTTTTCCATACTTTGCTCAATGGCAAAAATCTCACGGGAAAGTGTTTATCTACTGGCTGGGGACACAGCCATTTCTATATATTGCGGATCCAGAGTTTCTAAAGCGAATGTCTGCAGGTGTTTTGGGTAAAAGTTGGGGA…	MEFLGFLKDVGLAMVVFLLFILARLVYTCWVLPNLAYRKLRKNGLNGPSPSFPLGNISDMMRSKTEMMKSDSSLSLSSITHDIHSIVFPYFAQWQKSHGKVFIYWLGTQPFLYIADPEFLKRMSAGVLGKSWGKPSVFRNDRKPMFGKGLIMVEGDDWVRHRHVITPAFSPANLKAMGSLMVESTCNMLDRWSSSINSGQTEIDVEREIISTAGEIIAKTSFGMSYENGKKVFEKLKAMQLTLFNSNRYVGVPFSKFMCPKQYLEAKRLGNEIDVLFLSIINDRMKVNNNGTGNTEKNLLGLMLADNCVDGRLVNSLTTRELVDECKTFFFGGHETTALTLTWTLLLLAMHPKWQNQLREEIKEVVGDEVVDATMLVGLKKMGWVMNEVLRLYPSAPNV…
AeCYP71D18	Arel.033426	ATGCTAGCAGAAATGGAGCTCCATTATTCCCTATTTACTGTCATATCTTCCCTTCTCCTCTTCACCTTCTTCCTGCTTAAGTTAGCCAAGGAACTGAAAGCTTCCAAAACACAAAAACTCCCACCCGGGCCATGGAAGCTACCTGTCATTGGAAATATGCTCCATTTGGCAGGTACACTACAAACTCATGGTCTCCGAGACTTGGCCATTAAACACGGACCTCTCATGCATCTACAACTTGGTGAAATTTCCGCCGTGGTTGTATCATCTGCCCGAGTAGCGAAAGAGGTATTGAGAACTCATGATATTGCCTTTGCAGACAGGCCAAAGCTTGTTTCCACCAAGATTCTCTTGCGCAATGAAAAAGACTTGGTTATGTCTATCTATGGTGATTACTGG…	MLAEMELHYSLFTVISSLLLFTFFLLKLAKELKASKTQKLPPGPWKLPVIGNMLHLAGTLQTHGLRDLAIKHGPLMHLQLGEISAVVVSSARVAKEVLRTHDIAFADRPKLVSTKILLRNEKDLVMSIYGDYWRQMRKLCTVELLNTNKVSFFRSIREEEAWRLVQSIQSSLESPINLSKRFSAFTNAVTCIATVGKRSQFQDELIQVIEDIASLAGGFDVSDLFPSIKLLHVLSGMKPKLQTIRKKLDNIFDNIILEHKENRDNTNKGYDVTGEDDLVDVLLSVQERGGFEFPVTTDDIYGLILNMLIGGTDTSATALEWAMSELIRNPRVLEKVQAEVRQALKGKTTIHENDIQDLSYLKLVIKETLRLHPPLALLLPRKCRDERQIDGYRIPIDTK…
AeCYP749A6	Arel.022277	ATGGGTGTTGTTGAATTTCCCTCAATAATCTTTCTTCTGAGTTCTCTGTGTCTGTTCCTCCTCTTTGTTTTCACAAGGTTCATGTATGGATTATGGTGGACTCCGATTCGTATCCAGAGGATGATGAAGCGACAGGGGATCAAGGGTATTTCTTACAGTTTCCCCCATGGAAACACCAAAGAAATCATCAAAATGAGGAAGGAATCCATAAGCAGACCCATGGATTTATCACATAACATATTTCCCAAAATTCAGCCTCACCTTCACTCTTGGCTTAACATATATGGGAAGAATTTTGTGAATTGGTATGGTCCTAGAGCTGATTTTGTTGTTACAGAAGTGGATTTAGTTAAAGAAATAATGAACAGAGATCAAGCTTATCCGAAAATTGACCCAGAA…	MGVVEFPSIIFLLSSLCLFLLFVFTRFMYGLWWTPIRIQRMMKRQGIKGISYSFPHGNTKEIIKMRKESISRPMDLSHNIFPKIQPHLHSWLNIYGKNFVNWYGPRADFVVTEVDLVKEIMNRDQAYPKIDPEWFIKKLIGDGLVTTKGEKWAKQRKLANHTFHAESLKSMTPAMIASVEMMLERWKQHEGKEIEVFEEFRLITSEVISRTAFGSSYLEGKDIFEMLIKLSLIFSRNSFKVKLPGLR
AeCYP86A2	Arel.020213	ATGGATACATCAACGGTCATGATCATTTTATCGGTGATGGCGGCTTATTGGGTGTGGTTTAGGTCCATGGCGCGGTCGCTGAAGGGTCCACGTGTCTGGCCCTTATTGGGCAGTCTTCCGGGATTGATTGAGCACTCTAACCGGATGCATGAATGGATAGCTGACAACCTACTCGCGTGTGGCGGCACGTACCAGACCTGCATATCTGCGATCCCGTTTATAGCGAGGAAGCAGGGGCTTGTGACGGTCACGTGCGATCCCGAGAACTTGGAGCATATTTTGAAGCTTAGGTTCGATAATTACCCGAAGGGTCCTACTTGGCAGAGTGTGTTCCATGATTTGCTGGGGGAGGGGATCTTTAATTCTGATGGTGACACGTGGGTGTTCCAGCGTAAGACC…	MDTSTVMIILSVMAAYWVWFRSMARSLKGPRVWPLLGSLPGLIEHSNRMHEWIADNLLACGGTYQTCISAIPFIARKQGLVTVTCDPENLEHILKLRFDNYPKGPTWQSVFHDLLGEGIFNSDGDTWVFQRKTAALEFTTRTLRQAMARWVSRAIKLRFCPILKTAQVEGKPVDLQDLLLRLTFDNICGLAFGKDPETLSPGLPDNSFASAFDRATEATLQRFILPETIWKLKKWLRLGMEVSLTQSVKHVDQYLQSVINTRKLDLLSQQNGSGGVPHDDLLSRFMKKKESYTDEFLQHVALNFILAGRDTSSVALSWFFWLVSRNPRVEQKILTEICTILMETRGSDTNNWLEDPLVFDEVDRLIYLKAALSETLRLYPSVPEDSKHVISDDILPDGT…
AeCYP86A3	Arel.020820	ATGGATATGACTATGGTTTTACTCTTGTTTACTGCTGTTGCTGCTTACTTGCTATGGTTCACCTTCATCTCACGGTCGCTAAAGGGTCCGCGTGTCTGGCCTATATTGGGCAGTTTACCGGGCTTGATCCAGCATTGTAACAGGATGCATGAATGGATTGCTGATAACCTTCGCGCGTGTGGTGGCACGTACCAGACATGCATATGTGCCATACCCTTCTTGGCAAGAAAGCAAGGTCTCGTGACTGTCACGTGTGACCCGAAGAATTTGGAGCACATATTGAAGACCCGATTCGATAATTACCCAAAAGGTCCGACATGGCAAGCTGTGTTTCATGATCTACTTGGCAAAGGGATATTCAATTCTGATGGTGACACATGGCTGTTCCAAAGGAAGACA…	MDMTMVLLLFTAVAAYLLWFTFISRSLKGPRVWPILGSLPGLIQHCNRMHEWIADNLRACGGTYQTCICAIPFLARKQGLVTVTCDPKNLEHILKTRFDNYPKGPTWQAVFHDLLGKGIFNSDGDTWLFQRKTAALEFTTRTLRQAMARWVNQAIKHRFCPILKTAQLEVDPVDLQDLLLRLTFDNICGLAFGKDPQTLAPGLPDNSFASAFDRATEASLQRMIFPKVIWKLKKWLRLGLEVSLSRSLTHVDKYLSDVIDTRKLELMNQQKGGDPHDDLLTRFMKKKESYSDKFLQHVALNFILAGRDTSSVALCWFFWLIIQNPTVEEKVVREICTVLMETRGDDVSSWIDEPLGFDEVDRLVYLKAALSETLRLYPSVPEDSKHVVADDVLPDGTFV…
AeCYP736A38	Arel.031173	ATGGATGTGACTCGCCACTTTGCTTCAGAAAACACCAAAAATAGAATCAATAATACCTGCAAAAACAAGAACAAGGAAACAAAGAAGAAGAATCAAAGCCAAAAACCCAGTTCTTCCGAGCCGATTAAGCGCGTGATTCGACTCATCGGAGGCAGAATCATTGATTCTGAAAATGGCAAAACTTGTCACCAGTGTCGGCAAAAAACCATGGATTTTACAATGACTTGCAAGAACAAAGATGTGGATTGGCGATGTCCCGTACATCATTATTGTCACAAATGCCTATTGAACAGATATGGGGAGAAAGCTGAGGAGGTGGCAGCATTGGTTGATTGGAAATGTCCCAAATGCAGAGGCATTTGTAATTGCAGTTATTGCAGGAAGAGGAGAGGCTGTCAG…	MDVTRHFASENTKNRINNTCKNKNKETKKKNQSQKPSSSEPIKRVIRLIGGRIIDSENGKTCHQCRQKTMDFTMTCKNKDVDWRCPVHHYCHKCLLNRYGEKAEEVAALVDWKCPKCRGICNCSYCRKRRGCQPTGILVHAAKANGFSSVCDMLHAKDSKKGKTERSASSKKKNDSDEVLGLKKGQSEMLLAELACRKSSHRKCDVSVVQLHIKLLSLIQQNSGKECGNLWLEDLKNCILESQCPSKEQVLDFLNLGPGGYEELNSSKKLRLLNFLCDEALGTLEIRSWIVKQNSEFVKEEKKAAREKVLVDKEKVKNMKKQLEGEVTAAILLRNGAPLSISEHENLVSKVKAKIAQTLAETLEGLDTRMKKEQQSDAVRSEPILLDANGRVFWKLRGY…
AeCYP72A27	Arel.031747	ATGCTGCCAGCCATGTATTTAAGTTGTAGAGAGATGGTGAGCAAATGGGAGAAGATGGTTTCGGAGGACGGGTCGTGTGAGTTAGACGTAGTGCCATTTCTTGATACATTAACTAGTGACGTAATTTCACGTATAGCATTTGGAAGCAGTTCACTTAAATGCCAAAAATTCAAAGTACAAAAATTGAATTTTAAATACGTATTAATTAAGACCAAAAATTGA	MLPAMYLSCREMVSKWEKMVSEDGSCELDVVPFLDTLTSDVISRIAFGSSSLKCQKFKVQKLNFKYVLIKTKN
AeCYP98A2	Arel.025522	ATGGCTCTCTTCCTTCTCTTCTTCATCTCCTTCACCATAATTTTCCTCACATATCAACTCTACCAAAGGCTAAAATTCAAGCTCCCACCCGGCCCACGGCCCTGGCCCATCGTCGGCAACCTCTACGACATAAAACCGGTGAGGTTCCGATGTTTCAACGACTGGTCCCAGTCCTACGGCCCAATCATATCGGTCTGGTTCGGGTCGACCCTTAACGTTATCGTAAATAACACAGAACTTGCCAAAGAAGTGCTCAAGGAGAATGATCAGCAGTTAGCAGACCGGCACAGGAGCCGATCGGCAGCTAAATTTAGCAGGGAAGGCCAGGATTTGATTTGGGCCGATTACGGGCCTCACTATGTTAAAGTTAGAAAAGTTTGTACGCTTGAGCTATTTTCT…	MALFLLFFISFTIIFLTYQLYQRLKFKLPPGPRPWPIVGNLYDIKPVRFRCFNDWSQSYGPIISVWFGSTLNVIVNNTELAKEVLKENDQQLADRHRSRSAAKFSREGQDLIWADYGPHYVKVRKVCTLELFSPKRLEALRPIREDEVTAMVESIYKDCTNPDNMGKSFLVRQYLGAVAFNNITRLAFGKRFVNSEGVMDEQGKEFKAIVANGLKLGASLAMAEHIPWLRRLFPLEEEAFAKHGARRDNLTRAIMEEHTLARQKTGGTKQHFVDALLTLQSKYDLSEDTIIGLLWDMITAGMDTTAISVEWGMAELIKNPRVQEKAQEELDRVIGYERVLTESDFLNLPYLQSVAKEALRLHPPTPLMLPHRANANVKVGGYDIPKGSNVHVNVWAVAR…
AeCYP72A28	Arel.011062	ATGGATTCAAAGATTGTTAAACAGGATCTTGATAGAATCAGTGGCCTTCCTGAATCAATCTTGAGTCTGATCATCTCACAGCTTCCAGTGGATGAAGTGGTAAGAACAAGCGTGTTAGCGAAACGGTGGAAAGACTCTTGGAAGTATGTGACTCGTCTTGATATAAATCCAATGAAGATGATCAGGTCATGGAGAGTATTCGTCAAACGTGATCTACTAGATGATGATGAGCCCTTTGATATCTCAGGTTTGACAAACAGCCTCTTTCATGCCACAGGCTTGATCACCTCCATTATCCAGTCTATACAAAATGAAGTCACCCACTGCCGGATTGTTCATTTTCCTATCAATATTATATCTGGGGAATTGCAAGAATGGGTTGAAAAACTTGTCAAGAGG…	MDSKIVKQDLDRISGLPESILSLIISQLPVDEVVRTSVLAKRWKDSWKYVTRLDINPMKMIRSWRVFVKRDLLDDDEPFDISGLTNSLFHATGLITSIIQSIQNEVTHCRIVHFPINIISGELQEWVEKLVKRKGFKTLALTCEDVQSLGEVTSLELPPGIFGAIQSLELDHYPLFDLTPFQNCDKLQILKLRRVDSNNSFLSGILFYCKDLKELSLRGCSGFTELHICSRNLKILELRFLCIDKINISTEALTTLILDTITCFRKFVIINAPRVAEFRAYCRAKGWKKNQDVDMKIYLDAEELLERFSGFLSCHEGFNPIYAYRLGYISPFKNLQVLSTSLDLNDIRHAILLSYIFRVCFRLEILDITVEVRDETILNQCSGSCLYYPEHLFWEKKEV…
AeCYP71D19	Arel.031255	ATGCTCGGAGCAATGGAGCACTATTGTTCCCTATTTTCTGTCTTATTTTCCCTCATTCTCCTCACCTTTTTCCTGTTTAAGTTAGCCAAGGAACTGAAAACATCCAAATCACAAAAACTCCCACCTGGGCCATGGAAGCTACCTGTCATTGGAAATATGCTCCATTTGGCAGGTACACTACAAACTCATGGTCTCCGGGACTTGGCCTTGAAACATGGACCTCTCATGCATCTACAACTTGGTGAGATTTCAGCTGTTGTCGTATCATCTGCCCGAGTAGCGAAAGAGGTATTGAGAACTCACGATATTGCCTTTGCAGACAGGCCAAGGCTTATTGCCTCCGAGATGCTCTTGCGCAATGGTAAAGACTTGGTTTTTGCTCTCTACGGTGATTATTGG…	MLGAMEHYCSLFSVLFSLILLTFFLFKLAKELKTSKSQKLPPGPWKLPVIGNMLHLAGTLQTHGLRDLALKHGPLMHLQLGEISAVVVSSARVAKEVLRTHDIAFADRPRLIASEMLLRNGKDLVFALYGDYWRQMRKICTVELLHAKKVSFFRSIREEEAWRLIESIRLSLESPVNLSKRFSALTNAVTCRATIGKRSQYQDELIQLIEHTASLAGGFDISDLFPSIKLLHVLSGMKPKLQTIRKKLDKIFDNILLEHKENRNSTYKGYGVLEEEDLVDVLLSVQERGGFEIPITTDDIYGLILNMLIGGTDTSSTALEWAMSELMKNPRVLEKAQAEVRQCLKGKTTIHENDIQGLSYLKLVIKETLRLHPPIPLLLPRKCRDECQIDGYRIPINTK…
AeCYP71D20	Arel.033428	ATGGAGTTTCAGCCCCCTTTGGCTATCATCACTTCCTTCATCCTCCTCTTCCTCTTTCTAGTCAAGTTATTCAAAAGATCCAAACCCGAGAAACTGCCCCCCGGACCACCAAAACTACCTTTCATAGGAAATTTGCTTCAAGTGGCCCGTGCAAATCCGATACCACACCGTGGCCTCCTCGAGTTGGCCACAAAATATGGACCTTTAATGCATCTACAGCTCGGTAACATTCCAGCTATAGTGGTATCATCGCCACGAGTGGCGAAAGAGGTACTAAGAACACATGACCTTGCATGTGCAGATAGGCCAGATATGTTACTAGGCAGAATTATGTTAAAGAATAGTAGGGATATTGTTTTGGCCCCCTATGGTGATTACTGGAGGCAAATGCGCAAAATT…	MEFQPPLAIITSFILLFLFLVKLFKRSKPEKLPPGPPKLPFIGNLLQVARANPIPHRGLLELATKYGPLMHLQLGNIPAIVVSSPRVAKEVLRTHDLACADRPDMLLGRIMLKNSRDIVLAPYGDYWRQMRKISTTELLSANKVRSFCNIREEESWQLIESVRSSLGSPFNFSIKVTAMANSVICRATIGKKCKYQEELIELVEDIAYWGSGFFMADLFPSLKFLEYVNGMRPTLEKMRRKLDHIFSNIIDDHKEKLARRKEQNVSDVDAKDEDLVDVLLRINEGQQLEFPITSNDIQGTTLDMFTAGTDSTSATLQWIMSELMRNPRVMEKAQAEVRQAFKGKTIIHEADIEGLSYLKLVIKETLRLHAPVPLLVPRECRKKCEIDGYTIPVGTKVIV…
AeCYP88D2	Arel.005668	ATGGCACTTGCTAAGGAAATCATGGGTTCTTCTTTTTTGGAGAGATCTTCATTTATTAATTCATCTAATATTCTTTTCTTGAATAAACCTTTCAACCCAGTTCTGGTTCCCCCGGAAAAAAGGAGATTTCTAGTAAGGAAGGCTGTGAGAACTACCCCAGTAGCAGTTATTAGTGAGAATTTGAATTTGGTAAGAGTTGTGCCCGAAAAGGCTGTGAAATTCAAGGTCAGAGCTGTGGTGACTGTTAGGAACAAGAATAAGGAAGATTTCAAGGAGGCGATTGTGAAGCAATTAGATGCTTTTACCGACAAAATTGGAAGGAATGTTGTGTTACAACTTGTTAGCACCGAAATTGATTCAAGAACTGGAACTCCTAAGAAAAGCAAGGAGGCGGTGTTG…	MALAKEIMGSSFLERSSFINSSNILFLNKPFNPVLVPPEKRRFLVRKAVRTTPVAVISENLNLVRVVPEKAVKFKVRAVVTVRNKNKEDFKEAIVKQLDAFTDKIGRNVVLQLVSTEIDSRTGTPKKSKEAVLKDWSKKSNVKAERVNYTADFAVDSNFGVPGAITVINKHQKEFFMESITIEGFACGPVHFPCNSWVQSNKDYPGKRIFFSNQPYLPSETPAGLKALRQKELRDLRGDGKGVRKLSDRIYDYDVYNDLGNPDKGIDFVRPTLGGEKRPYPRRCRTGRLPTNTDMSVESRVEKPLPMYVPRDEQFEESKQNTFSASRLKAVLHNLVPSLMASISSKNPDFKGFGHIDSLYSEGLLLKLGLQDELLQKLPLPNVISRIQGGQGNILKYDT…
AeCYP72A29	Arel.012519	ATGAGTTTTTTGCCAACCAAAAGAAATAAGAGGATGAAGAAAATTGCTGAAGAAGTTAAAGCTGCAATAAGGCATATGATCGACAAACGGTTGAAGGCAATGGAAGATGGAGAAGTTAGTGCTGATGACTTATTAGGTATATTATTGGAATCTAATTCCAAAGAAATTAAACAGTTTGGAAACAAGAATTTCGGAATGACTATCGATGAGGTTATCGAAGAATGCAAACTATTTTATTTTGCGGGACAAGAGACAACCTCAAGTTTGCTTTTGTGGACAATGATCTTATTAAGTCAACATCAAGACTGGCAAAAGCGCGCTAGAGAAGAGATTTTTCAAGAATTCGGAAACAACAAACCGGATCTTAATGGATTGAATCACCTGAAAATTGTAAATATG…	MSFLPTKRNKRMKKIAEEVKAAIRHMIDKRLKAMEDGEVSADDLLGILLESNSKEIKQFGNKNFGMTIDEVIEECKLFYFAGQETTSSLLLWTMILLSQHQDWQKRAREEIFQEFGNNKPDLNGLNHLKIVNMIVLEVLRLYPPK
AeCYP96A5	Arel.006184	ATGAGTTTATTTTCTGTGGAGCTTAATCATGGTGGTAGGTTCATTGAAGAACCAATATACCATTATGGAGGAGGTTTAGAATTGCTTCATGACGTTGATGGTGACTGGCTGAATGTTGACAAAATATACAACTTACCTAAGAAGTTTGGATACAAAAAGGATACTGCGGTGTATTTCAGAGTGGGTCGTTCGAGTATTCGTTATGGTTTAGAGTTAATACATGATGACCATATTGTTAGGTTACTAGTTGAGGAGGGTGAACATTCTGGTGTAGTTGATCTATACTGTGACCACTCCATTGATGAAGTCTTACCATTTGAGAGGGAAGTTGATCAGGTAGCTGAGAGGAAAGTTCAGCAGGTAGCTGAGAGAGAAGTTGACGTCGTTGATGTACAAGTT…	MSLFSVELNHGGRFIEEPIYHYGGGLELLHDVDGDWLNVDKIYNLPKKFGYKKDTAVYFRVGRSSIRYGLELIHDDHIVRLLVEEGEHSGVVDLYCDHSIDEVLPFEREVDQVAERKVQQVAEREVDVVDVQVDAPKGYDDESTNGETDDVFSDVSDDDGNAELINARLHKEEIRKSKIKELEVVCEVQLDDEVEVQCGEVPVKHTWTQVSSSVHTNKASDNQETTENTGRKEKRANKASKKQKNVDDDYNVETNNQEITENTGRKKKKTNKANKEQKNVDADDDYNVEPTFSSDDDVMTKFSTRGMGPWEEIYEDSDIEVPASPPLSSDSEWEGEEPRTQMDADRPQKHSTLFGATNEDLLSEDAINNLLGVQMQHGCQVVLSALKHGRGPVRWCVFI…
AeCYP81Q5	Arel.002491	ATGTTATCAGCAGGAACTGACACTTCATCTGGGACAATGGAATGGGCGCTATCCCTTTTACTAAACAATCCTGATACCCTCAAAAAGGCACGTAACGAAATTGATATCCATATAGGAGAATCCAGACTAATTGAAGACTCTGATCTTGCTGAGCTTCCTTATCTCAATGGAATCATAAACGAAACACTCCGTATGTACCCAGCTGCACCATTGATTCCACCCCACGAGTCTTCGGACGAGTGTACTGTTGGAAATTTTCGTGTACCCCGTGGCACAATGCTACTAGTGAACGTATGGGCGATACAGAACGATCCTAAGATATGGGAAAATCCCACCAAATTTAAGCCCGAAAGGTTTATAAATGTCGAAGGGGAAAGAGATGGATTTAAGCTTATGCCA…	MLSAGTDTSSGTMEWALSLLLNNPDTLKKARNEIDIHIGESRLIEDSDLAELPYLNGIINETLRMYPAAPLIPPHESSDECTVGNFRVPRGTMLLVNVWAIQNDPKIWENPTKFKPERFINVEGERDGFKLMPFGFGRRKCPGEGLAMRVVGLALGSLIQCFEWERVGEDKIDMSEVAGLTVSKAQPLVAKCRPRPNLVNLLSQL
AeCYP71A3	Arel.007695	ATGCTGCTCATGTTGCTTCCCTCATTCCTTTCATTCTTCTTTTGCACAGTTTTACTGTTCATATGCTTACCATCATCGTCAGCTACTACTAATGTTAAAACCAAAACAAGCCCAAAAAACTTACCACCTTCCCCCCCAAAGCTTCCAATTATAGGAAATCTTCACCAACTTGGGTTGAATGCGCACCGCTCCCTCCAATCCCTAGCTCAAAAACATGGTCCCCTCATGCTGCTTCACCTTGGAAAAGTACATCTACTCGTCGTTTCCTCAGCTGATGCAGCTAAAGAGATCATGAAAACATACGATCTCGTCTTCTCCAACAGGCCTAAATCAAGCATCCCCAATGCACTTCTCTATAATTGTAAGGACGTCGCTTTTGCTCCTTATAGTGAATATTGG…	MLLMLLPSFLSFFFCTVLLFICLPSSSATTNVKTKTSPKNLPPSPPKLPIIGNLHQLGLNAHRSLQSLAQKHGPLMLLHLGKVHLLVVSSADAAKEIMKTYDLVFSNRPKSSIPNALLYNCKDVAFAPYSEYWRQIKSICVLHLLSNKRVHSFRNVREEEVALLVEKIRQKSCSSSAVNLTELFFSLTNDVVCRLALGRKYSAEGRSKFTELLGQFTKLVGGFSVEDYIPWLSWVDRIDGLKGRVERLAKRIDAFMEVVVKDHILDAHARKKKGDDDQTGQDFVDSLLENQRLCTTGFPIHRDTIKAVTLDMFVAGTDTTCTLLEWTMAELIRNPKVMCKLQNEVREIGRGKSSISEDDLQKMRYLKVVIKETLRLNTPVPLLVRRESREDVKVMGYDI…
AeCYP72A30	Arel.015875	ATGGGAGTACTACTAGTAGCTTCAGTTGTAATCTCAGTTGTTTTGGTTACAATTGTGAGCTTGACACACAAATTAGTGAATAGGCTATGGGTAAGGCCAAAACAGATAGAGAAGTACCTGAGAGAGCTGGGGTTTAGTGGCAATCCGTACAAGTTTTTGCACGGCGATATGAAAGAGTTCTCAAGGATATCAAAGGCAGCAATGTCGAAACCCATGGACTTCTCCTATGATGTTGGAGCCCGGGTTCTACCATATCACCATCATTTAGTCAAGAAATATGGTAACAACTCATTTATGTGGTTTGGAGCGAAACCAAGGTTAAATATCATGGATCCAGTGCTAGTCAAGGAGATTTTGTCTAAGCCTGATGAATTTCATAAAGTATACCCAGATCCAGTT…	MGVLLVASVVISVVLVTIVSLTHKLVNRLWVRPKQIEKYLRELGFSGNPYKFLHGDMKEFSRISKAAMSKPMDFSYDVGARVLPYHHHLVKKYGNNSFMWFGAKPRLNIMDPVLVKEILSKPDEFHKVYPDPVADLVVGGLSTAHGEKWPRHRKIINQAFNLEKLKGTLSEIYLSTTNMISTWKTLVSTTGTTEVDAWPYIENLARDMISRAAFGSNFEEGRRIFQLHEKQADLAFQFMGTSYIPWARHFKIKANRKMKRLNGEMIDQLSGIIKKREKALKMGQKINKNDLLSVLMEATRKEIQEEGTGMTMEEVVDECKVFYSAGADSTARLLVWTMILLSKHTDWQARAREEVLQLLGNKKEFDFELLNHLKIVTMILYEVLRLYPPAGMLLRATSK…
AeCYP736A39	Arel.031586	ATGGGCTTGACTCGCCAGTTTAAAGATACCAGCAAGAGACTTGACAAAATCTTGGAGTTCATTATTGATGAGCATGAACAAAATGCAAGCAATGGAAATGCAGGCGGTGACTTTATTGATGATATGCTGTCATTAAAGAATAAGCCTTCAAATACCCATGATGAGCTATCAAAAGTAATTGATAGATCAGTGATTAAAGCTATCATGATAGATATTATCTCTGCAGCTATTGATACTTCAGATACTTCAATTGAATGGATTTTAACAGAACTTATTAGACATCCAAGGGCCATGAAAAAGTGCCAAGAAGAGATAGATGCCATTGTCGGAGTTGATCGAATGGTGGAGGAGACAGATTTGCCCAAGTTAGAATATCTGTACATGGTGGTTAAGGAAGGT…	MGLTRQFKDTSKRLDKILEFIIDEHEQNASNGNAGGDFIDDMLSLKNKPSNTHDELSKVIDRSVIKAIMIDIISAAIDTSDTSIEWILTELIRHPRAMKKCQEEIDAIVGVDRMVEETDLPKLEYLYMVVKEGLRLHPVAPLLGPHESMEDITINGYFIPKQSRVIVNSWALGRDPNVWSENAEEFLPERFEGSNIDVRGRDFQLLPFGSGRRGCPGMQLGLITVQLVVARLVHCFDWKLPNGTTPDNLDMTEKFGLTIPRVKHLLAVPKYRL
AeCYP704C4	Arel.016349	ATGAGATTTATACATCTGATCCGGCCAATGTTGAGTATATTCTCAAAACAAATTTTGATAATTATGGCAAGGACAACTGGTCATGATGCCCAAACTGCAGCTGATGTGCTTGAGGAACTTGATAAAGAAGATGTTATTCTTCAAGGTGCTAAAGATGGGCTTCAGGATCTTAATTTTGATAGCTCATCCATGATACATGGCACTAATTCTGACGAGTCTACAAGTTCAAAGAAAAGAAGCAGAAGTATGGATCCAGTTACAGAGGCTGTTTATAGTACTTCAATGATGATAGCTACTCAACTTCATGAAACCGTCAAAATGTTTAGTAAAGCAATTTGTGAGGACAATCTGATGGAGCAAAAAAAGAAACTCAATGAGGAGCTTTCTAACATTTCTAGA…	MRFIHLIRPMLSIFSKQILIIMARTTGHDAQTAADVLEELDKEDVILQGAKDGLQDLNFDSSSMIHGTNSDESTSSKKRSRSMDPVTEAVYSTSMMIATQLHETVKMFSKAICEDNLMEQKKKLNEELSNISRIFKVQRYQVAKKMTDNENLMILFFAALNDENDDFVQRKEAAAAASGSRSSSSSSSSSSNAIPVRPREDTPLLGDQTDSLSSQPKTFANVFIAVVGAGVLGLPYTVMKTGWLTGAVMILAVAALTNHCMMLLVYTRRKLESPLSFSKISSFGDLGFAVCGPLGRFAVDSMIVLTQAGFCVGYIIFIGNTLANLYNSPPPSPNLNTHHHISAKSLYIWACFPFQLGLNAIPTLTLLAPLSIFADIVQIGAMGVVLVEDVLKFINHMPA…
AeCYP71D21	Arel.031199	ATGGAACTTCAATTTCCACTATTTTTCATCTCTTTTCTCACTATTCTCTTCTTTTTCCTATTCAAAAAATCATCCAAAACAACTAAAAATCTCCCTCCCGGACCCCGAAAATTACCTATTATAGGAAACATACTAGAATTGGCAGGTGAAGTTCAACACCGAGTGCTAGCCAAATTGTCACGAAAACATGGCCCTATAATGCACCTACAACTTGCTGAAATTTCCGCAATTGTTGTCTCATCCTCTAAAGTTGCCAAAGAGGTACTAAAAACAAATGATCTTGCGTTTTGCGATAGGGCACAACTTCAGCTTAGCAAGATTATATTGAAAGGCTGTAAAGACGTGGTTTTTAATGACTATGACGATTATTGGAGGCAAATGCGTAAAATATGCACAGTT…	MELQFPLFFISFLTILFFFLFKKSSKTTKNLPPGPRKLPIIGNILELAGEVQHRVLAKLSRKHGPIMHLQLAEISAIVVSSSKVAKEVLKTNDLAFCDRAQLQLSKIILKGCKDVVFNDYDDYWRQMRKICTVELLTANKVNSFRAIREDEAWNLVESIKKSLDSPINLTHKFTSLTNAITCRAAIGERSKYQDELVHLIELMAALGGGFDIADLFPSYKFLHVLSGLRSKLEKVRKQLDKIFYNIIKEHEEKRAKTKNSDDRGAGEEDLVDVLLRVQEKGGLQFPISSNNIQGIICDMLTAGTDTASAALDWAMSELVRNPSVLRKAQDEVREAFKGKTKIHEDDVQGLSYLKLVIKETLRLHPPAPLLLPKECREQCVIEGYTIPVRTKLIVNAWAI…
AeCYP71D22	Arel.006183	ATGGATCAAATACATATTCCAACAAAAACCACAAAAATTGGCACCAGGCCCCCCAAAGCTCCCAATTATAGGGAACTTGCACCAGTTGACTGGCCCTTATCCACCGCACCATACCTTCACAAACCTAGCCAACAAACATGGAGGCATCATGCACCTCCAAACCGGCCAAATTTCAATGGTAGTCATCTCGTCTCGAGAGACAGCCGAAGAGCCTTAAAAAACCATGACATTGTTCTTGCACAAAGACCCCAAGGCCTTGCTACAAATATAATGTCATACAATTATTCCGGCTTTTCCTTTACTCCCTATGGAAATAGTTGGAAAGAGGTTCGAAAAATTATAGTGATGGAGTTTAATCTAAGCGTTAAGCGCGTTCAGTCATTTAGATCTATTCGAGAA…	MDQIHIPTKTTKIGTRPPKAPNYRELAPVDWPLSTAPYLHKPSQQTWRHHAPPNRPNFNGSHLVSRDSRRALKNHDIVLAQRPQGLATNIMSYNYSGFSFTPYGNSWKEVRKIIVMEFNLSVKRVQSFRSIREEEAMNLIDKISWVSCHPINLSKMIWDLTNSMISRAAFGEKHKDLNEYLNLLNEGSRLEGSFLLENFPSSKVLIYLTGISTAMRTIHQRMDDILENILNEHEAKRLAASTVTDHGAPEKEDLIDALQRLRACDNLRFPITRNNIKALIGDIFGAGGVNPPTTIEWAMTELLRNPRVLAKARAEIRQAFKGKMNIEEPESQALDYLNSVIKETLRLHPPIPLIPREAREKCEISGYHVPIKSRVFINAWAINRDPKDWNDADCFQPER…
AeCYP71D23	Arel.032713	ATGGAGTTCCAATATTCCCTCTTCTCTATCATCATTACTTCCCTAGCCAGCATCCTCTTTTTCTTTGTTTTGATCAATAAGTTATTGAAAAGATCCTCAAAAGTAGCTCATAAACTTCCCCCAGGGCCATGGAAGCTACCTCTGATCGGAAATTTGATTCAAGTGGCTGCTTCAAATCCGATACCACATCGCGGTCTGCTTGAATTGTCAAGGAAACATGGACCTCTCATGCATCTACAACTTGGTAAAATTCCTGCTATTGTTGTCTCATCGCCTCGAGTCGCCAAAGAGGTATTGAGAACCCATGATCTTGCCTGCGCGGACAGGCCGGATATGCTCCTGGGCAAGATAATGTTGGCCAACAGTAGAGACATTGTTTTGGCTCCCTATGGCGATTAC…	MEFQYSLFSIIITSLASILFFFVLINKLLKRSSKVAHKLPPGPWKLPLIGNLIQVAASNPIPHRGLLELSRKHGPLMHLQLGKIPAIVVSSPRVAKEVLRTHDLACADRPDMLLGKIMLANSRDIVLAPYGDYWRQMRKISTSELLSANKVRSFRNVREEESWQLIDSIRSSLGSPINYSTKVTGMANAIICRATIGKKCKYQDELIEVVEDIAYWGSGFFMADLFPKLKFLEYITGMRPKLEDMRRKLDHIFGHIINEHREKLASRNEQNIHDTDEDLIDVLLRINESQRLEFPITSNDIQGITLDMFTAGTDSTSATLQWIMSELMRNPRVMEKAQAEVRQALKGKTIIYEADIQGLSYLKLVVKETLRLHAPVPLLVPRECRKQCEIDGYTIPVGT…
AeCYP81Q6	Arel.013126	ATGAATGGTATCATGTGCTTTGTTTTGTGGTTTCGTATTGCTGTATATATTGTAATTTCAGGATTTTTGATGATACTTATTTTTCTTCTTGTGAAATACATTGGAGCATATATAGAGGAACAACCAGTTGGAGAAATTAGTGAGACCTCTCCACTGATGCCCCAAAAATCATTTCGATTGCCTTACAGAACAGATGAAGAAGATGATCAGGAGTCTAGCTCTTCCGAGGATTTATACAACGGGAAGATTTGCGCGATCTGCTATGATGCGCCACGAAACTGCTTCTTTGTTCCTTGTGGTCATTGTGCCACTTGTTATGGATGTGCTCGAAGCATATATGTACCCGGCTGCCCCATTAATTCCTCCCCAAGAGTCTTCGAAAGAGTTCTATTAGCAGCA…	MNGIMCFVLWFRIAVYIVISGFLMILIFLLVKYIGAYIEEQPVGEISETSPLMPQKSFRLPYRTDEEDDQESSSSEDLYNGKICAICYDAPRNCFFVPCGHCATCYGCARSIYVPGCPINSSPRVFERVLLAAGTDTSVGTMEWALSLLVNNPEVLKKAQIEIDNHVGQDRLFNESDIADLPYLHCIITETMRMYPPGPLLVPHESSVRCTLGDYSIPGGTMLLVNEWAIQNDPKLWSEPRKFKPERFEGLEGTRDGFKFMPFGSGRRACPGEGLAMRMVGLVLGSLIQCFDWERVGKEMVDMTEGTGLTLPKLRPLVALLQAGVSTSVDTMEWAMSLLLNSPEVLNKAQNEIDNHVGQTRLINETDVAELPYLRCIINETLRMHPVAPFLVPHESSEE…
AeCYP72A31	Arel.002150	ATGAGTGTAACATTAATAATCTCCGTTGCAGTCTCAATTGTTTTGGTAAGTATAGTAAAATGGGCACTTGAAATTGTGAAAAAGTTGTGGGTGAGACCCAAGAAGCTGGAGAAATGGCTGAGAGAGAGAGGGTTCAAGGGCAATTCATATAGGTTTGTTTATGGGGACATGAAAGAGTTTGGAAGGATGAGAAGTGAAGCAAAATCCAAACCCATCAAACTCTCAGACGATATTCGATCGCGTGTTTTACCATTTCACCACCATATCATCAACAAGTACGGTAATAATTCGTTTATCTGGTTTGGGGCGAAACCGAGGTTAAATATTATGGACCCGGTGTTAGTGAAGGAGATATATTCAAGGCCCAATGATTTTCACAAACCATATCCAGATCCAATA…	MSVTLIISVAVSIVLVSIVKWALEIVKKLWVRPKKLEKWLRERGFKGNSYRFVYGDMKEFGRMRSEAKSKPIKLSDDIRSRVLPFHHHIINKYGNNSFIWFGAKPRLNIMDPVLVKEIYSRPNDFHKPYPDPIADLVVGGLLAAHGDHDFARGAKIISTYKYGN
AeCYP71A4	Arel.005276	TTTTTGTACCGATGGTTATCATCCGCCAGCAAAACAACCCAAAAAAATGTACTACCTTCTCCCCGAAAGCTTCCCATTATTGGAAACTTTCACCAACTTGGCAAAAACTTACACCTTTCACTTCAGTCCATGGCTCAAAAATATGGTCCACTCGTGTTGCTTCACCTGGGGAGTGTACCTGTACTTGTTGTTTCCTCGGTTGATGCAGCTAAAGAGATTATGAAAACACATGACCTAATTTTCTCAAACAGGCCTAAGACAATCTCTGGTAGAATGTTTTATAATTATAAGGACGTAGCGTTTGCTCCTTACGGAGAATACTGGAGACATGTAAAAAGTATTTGTGTTTTTCAACTTCTGAGTAGCGCAAGAGTTCATTCATTTCAAAAGGTTAGACAA…	FLYRWLSSASKTTQKNVLPSPRKLPIIGNFHQLGKNLHLSLQSMAQKYGPLVLLHLGSVPVLVVSSVDAAKEIMKTHDLIFSNRPKTISGRMFYNYKDVAFAPYGEYWRHVKSICVFQLLSSARVHSFQKVRQEEVDLLIENIKESCSKVINLSELFISLTNDIVSRVTLGRKYSTDIEGREGGGKSKIKELFREFTQLLGVFSVGDYIPWLFWIDRISGLKRREEKLIKKLDDFLEGVVKDHMSISDDRNNNTIGTDQGQDFLLSNTRVHAISKLREDETGLLMKKIVQSSSSAVDLSDLFMTLTNDVVSLAAFGRKFSEGESGRKFRKMMKEFVGVLGGFDIGTYIPSLAWISSVSGLYAKVDRIGKELDEFLEGLVEEHLQKGKNAGDQNVERTED…
AeCYP72A32	Arel.019790	ATGGTGCCAGAATTTTCAGTTAGTTGTTGCAACCTAGTCGATAAATGGAAGAAGTTGGTTGGTTCACAAGAATCATATGAAATTGATATTGCAACCGAAATGCAAAATCTTTCAGCAGATGTAATTGCTAGATCGGCATTTGGAAGCAGCTTTGAGGAAGGAAAGAAGATATTTGAACTTCAGAAAGAGCAAGTAGTGCTGGTGATTGAAGCAGCCGAAGCAATTTATATCCCTGGTCTTAGATTTATACCTACTAAGAAGAACAAGAGGAGATATGAGATTGACAGAATGATCAAAGCCATGCTTGGAGATATGATCAAAAAGAGAGAAAATGCCATGCAAAATGGAGAACCCTTTGGAGATGATCTACTAGGCTTGCTATTACAATGCAAAGAAAAT…	MVPEFSVSCCNLVDKWKKLVGSQESYEIDIATEMQNLSADVIARSAFGSSFEEGKKIFELQKEQVVLVIEAAEAIYIPGLRFIPTKKNKRRYEIDRMIKAMLGDMIKKRENAMQNGEPFGDDLLGLLLQCKENIDNEMTTEDVIEECKLFYFAGQETTANWLTWTIIVLSMHQDWQDKAREEVLHVYGKNKTPDHESLNHLKIVSMILQEVLRLYPSVSSQLRHTYKKTSIGNMSIPAGVEIYLPTLMLHHDPEYWGSDAEEFKPERFSEGVAKAFYPFGWGPRFCLGQSFAVIEAKLALAMILQNFSFELSPSYTHAPYTIITLQPQHGAPIILHQL
AeCYP94A4	Arel.008376	ATGTCAACAATTGAGAATAATTTCTTGATTTGCTCAATTGGGGAATGGGTTACCTTCCGGGAATGGAAGTCACGGCTAACTCCAGCGGGGTATGGGGCTTCTAGAGCTAATGTTAGACCTCCTTTGCCTCGTGTGCCCCACCATCGGGATAGTTTGAAAAGGATAAGGGACATATTGTCAGGGTCCGTTACATTGGCTCATGTAGGGTATGCAGAACTGAAGATCACCTCTGATTCTGAATCAGAGGTTCCATTCTCGGATGACGATGGTGGAAGTTCTGTAATTCGTGAAAAATTTGATCCCAATGAATACTTTCTTGCTCAATGGGGCTCAGAAAATCTGGCCGAAGCACAGAATGACAGAGCCACTCCAGTGAAGCATATCCAACAAGCTTCTTCG…	MSTIENNFLICSIGEWVTFREWKSRLTPAGYGASRANVRPPLPRVPHHRDSLKRIRDILSGSVTLAHVGYAELKITSDSESEVPFSDDDGGSSVIREKFDPNEYFLAQWGSENLAEAQNDRATPVKHIQQASSIRPSFLDESVQLDVIKSNDAKASSLDAFMRHGLGELNWEQPDPKPIPSALIELISLDHVPSSSNVVAGPFGVSTEKSKSDVLLSQTSSLHVLSDLVSLDVLPPMSTANEIPMSNDADLTDVCDSVKADNAVKLPPPILSANHDKLQRSDTSISEGVRVIRNSASLDSLDSGYESADMSSVSEFEGENIVDQLKRQVDYGRRCMSSLYKELEEERNASAIAANQAMAMITRLQQEKAALQMESLQHLRMMEEQAMYDMDALEKANDL…
AeCYP96A6	Arel.003082	ATGGCTCCCATTGGAATCACTGAAACATTATCGCTAGTAGCTCTCTTCTTTCTCTTTGTTTTCCTCTGGCACCGTAAAACTCAGACTCCGCCACAAAGCTCAAAACTTACAAGTTGGCCTGTCCTTGGCATGTTACCGGGGCTTCTGCGCAATGTTCATCGCATGCATGAGAATACAATCGATATTCTCCGAGAATCCGATGGAACTTTTCTTTTTCAAGGGCCTTGGTTTGCTAATGTTGACACTGTGGTCACTTGTGATCCTGCCAATATTAACCACATTTTGAGCAAAAACTTCTCTAATTACCCGAAAGGCCCCGATTTCAACAAGATTTTTGATAGCCTTGGAGATGGGATTTTCAATGCGGATTCGGAGTTGTGGGAAATCCAAAGGAAAACC…	MAPIGITETLSLVALFFLFVFLWHRKTQTPPQSSKLTSWPVLGMLPGLLRNVHRMHENTIDILRESDGTFLFQGPWFANVDTVVTCDPANINHILSKNFSNYPKGPDFNKIFDSLGDGIFNADSELWEIQRKTTMSLMNHTKFIKFLERIIWSKVEKGLIPILEHVSELGQEIDLLDVLLKFTYDTSCKLVLGFDPCSLSVDSMHIPSENAFVVAEEATFFRHVFPISYWKFQRWLNIGLEKKLQRAREELSKQTAAHSDTTPQQHHDDDQDFGLLSSFMDLYKGINTTIPSNNPYKFLKDAILSLLFAARDTTSASLSWFFYLTAINPSVEIKIREEIRTHLDFEGHNSLFDTNLDCLKKLVYLHAALCESLRLFPAVPLQHKVSVQQDILPSGHFIP…
AeCYP86A4	Arel.020214	ATGGATACATCAACGGTCATGATCATTTTATCGGTGATGGCGGTTTATTGGGTGTGGTTTAGGTCCATGGCGCGGTCGCTGAAGGGTCCACGTGTCTGGCCCTTATTGGGCAGTCTTCCGGGATTGATTGAGCACTCTAATCGAATGCATGACTGGATAGCTGACAACCTACGAGCGTGTGGCGGCACGTACCAGACCTGCATATCTGCGATCCCGTTTCTAGCGAGGAAGCAGGGGCTCGTGACGGTCACGTGCGATCCCAAGAACTTGGAGCATATTTTGAAGCTTAGGTTCGATAATTACCCGAAGGGTCCTACTTGGCAGAGTGTGTTCCATGATTTGCTGGGGGAGGGGATCTTTAATTCTGATGGTGACACGTGGGTGTTCCAGCGTAAGACC…	MDTSTVMIILSVMAVYWVWFRSMARSLKGPRVWPLLGSLPGLIEHSNRMHDWIADNLRACGGTYQTCISAIPFLARKQGLVTVTCDPKNLEHILKLRFDNYPKGPTWQSVFHDLLGEGIFNSDGDTWVFQRKTAALEFTTRTLRQAMARWVSRAIKLRFCPILKTAQVEGKPVDLQDLLLRLTFDNICGLAFGKDPETLSPGLPDNSFASAFDRATEATLQRFILPETIWKLKKWLRLGMEVSLTQSVKHVDQYLQSVINTRKLELLSQQNGSGGVPHDDLLSRFMKKKESYTDEFLQHVALNFILAGRDTSSVALSWFFWLVSRNPRVEQKILTEICTVLMETRGSDTNKWLEDPLVFDEVDRLIYLKAALSETLRLYPSVPEDSKHVISDDILPDGT…
AeCYP736A40	Arel.031579	ATGTTCCCCTTAGCATATCCCCTTCTTTTCCTCCTCCTTGGAGCTCTCTCATGGTGGATACTCCCCATCATATCTCCACTAAAACGCCACCATAAACTACCACCAGGTCCCCGAGGCTTACCAATTATTGGTAGCCTCCACACGTTAGGCGCCCTCCCCCACCGCACCTTACAAACCCTAGCCAAAAAGTATGGTCCTATCATGTCCATGAGGCTAGGGTCCGTGCCAACTATAGTAGTCTCTTCACCTCAAGCTGCCGAGCTTTTCCTCAAGACTCATGACAATATTTTCGCTAGCCGCCCTAAGGTCCAAGCGGCCGAGTACATGTCCTATGGTACTAAGGGCATGGCCTTCACCGCATACGGTCCACATTGGCGCAACATAAGAAAATTTGTTGTG…	MFPLAYPLLFLLLGALSWWILPIISPLKRHHKLPPGPRGLPIIGSLHTLGALPHRTLQTLAKKYGPIMSMRLGSVPTIVVSSPQAAELFLKTHDNIFASRPKVQAAEYMSYGTKGMAFTAYGPHWRNIRKFVVLELLTPAKINSFVGMRREELGIVVMSIKEASAANEVVDLSAKVADIIENMTYRLLLGRTNDDRYDLKGIMKEALALAGKFNVADFVPFLGPLDIQGLTRQFKDTSKRLDKILEFIIDEHEQNASNGNASGDFIDDMLSLKNKPSNTHDELSKVIDRSVIKAIMVDIISAAIDTSDTSIEWILTELIRHPRAMKKCQEEIDAIVGVDRMVEETDLPKLEYLYMAVKEGLRLHPVAPLLGPHESMEDITINGYFIPKQSRVIVNSWAL…
AeCYP704C2	Arel.020929	TATGGTCCGAAAGAAGTACTCAAGTTAGGAGAAATCCCAATTCCTTCTCCCAAGCACAACCAGTTACTTGTCCAAGTTCGCGCTGCAGCTTTGAATCCTATAGATGTAACTCCTGGCTGCGATATGGCTGGTGTTGTGATAGAGAAAGGCGAAGGCGTTTCAAAATTTGATATGGGCGATGAGGTCTATGGTAATATTCAAGATTTTGATGTGGATGGAGAAGTAAAACAGCTGGGGACACTGGCTGAGTTTATTGTTGTGGAGGAGCATTTGGTGGCTTTGAAGCCGAAAAACCTTTCATTTGAGGAGGCAGCCAGCTTGCCAGTGGCAGTTCAAACGGCGATACAAGGCTTCAGAATTGCAGGATTCAAAGAGGGACAAACAGTTTTTGTCGTTGGG…	YGPKEVLKLGEIPIPSPKHNQLLVQVRAAALNPIDVTPGCDMAGVVIEKGEGVSKFDMGDEVYGNIQDFDVDGEVKQLGTLAEFIVVEEHLVALKPKNLSFEEAASLPVAVQTAIQGFRIAGFKEGQTVFVVGGAGGVGSLVVQLAKHLFRASEVVATTSTAKVKFVKSLGANKVVDYTKTSESKSSFMVAKDYAPIIDITWPPSNPRAVHSGLIVSGEILEKLGPYLESGILKAVIDPAGPFHFSDVPKAFQHLETGRARGKTWHLVITSLSVVKNQMNIDKYTHQTKFRATILVLLLITCSALVLRIFTGKSIKNPKYPPVAGTVFSLLFNFKRLYDYLTEVARRHHTFRLLAQDQSEIYTTDTQNIEHILKSSFDKYSKGQYLQGIVTDLFGQGIF…
AeCYP736A41	Arel.031142	GGATTGACTCGACGTTTCAAGGCACTGCACAAAGATCTTGACAAAACCTTGGAGAAGATTGTTAATGAGCATGAAGAAGCTGCTACTAGTGGAAGTAAAAAGCTTGACCTGGATTTCGTCGATGTACTACTATCATTATTGGATAAATCTTCAGAAAATACTTATGCTGAGCTATCACACATGCTAGATAGAAGAACCCTAAAAGGAATTATAGTAGATATGATAGCAGCCGGTATTGAAACTTCACACGTTGCAATTGAATGGATCATGACTGAACTCATAAGACATCCGAGGATCATGAAACAACTTCAAGAAGAAATTAAGAGTGTTGTTGGAGTTAATGAGATTATAGAGGAGACTGATTTGACTAAGTTTAAGTACTTAGACATGGTGATTAAA…	GLTRRFKALHKDLDKTLEKIVNEHEEAATSGSKKLDLDFVDVLLSLLDKSSENTYAELSHMLDRRTLKGIIVDMIAAGIETSHVAIEWIMTELIRHPRIMKQLQEEIKSVVGVNEIIEETDLTKFKYLDMVIKETFRLHPVVPLNIRESMDNIVINGYYIPKKSRVLINSWTLGRDPDLWSENVEEFIPERFIVGVDYFGHDYKFLPFGSGRRICPGMQLGLINVRQIVAQLVHCFDWELPNGMSLSDLNMDEKFGLTLPRAQHLLAMPVRRL
AeCYP87A3	Arel.026569	ATGGAGGAAACAGAGAAGAAGAAGGTATCATCATCATCAGGGTCCTTTTGGAATTGGGCAATCGCATCAGTAATATTGAGATTAATACTCATTTACTTCCCTCAGAATCTCAATTTATCCTCTCGCCCCGAAGTCTCCACTCCTCTCACTAGCCTTCGCAGCCTGGCCGAGGGTTACTGGTTAAAGCAATCATCAATGTCGCCTTATGCTGGTTCTATGTACCATGGATCTCCAATTTTATTGTCAATCCTTGGTCCACTTACTGTGAATAGTTTGGTTTTTGTGATTGCAGATTTTTCCACTGCTATGCTTATTCGTGCAACTGGCCACAATCTTCAAGTGGCTTATACTCGGAGTTTGAAATCATTAGACCTTGGATTAGCTCCTTTAGCGGCTTTT…	MEETEKKKVSSSSGSFWNWAIASVILRLILIYFPQNLNLSSRPEVSTPLTSLRSLAEGYWLKQSSMSPYAGSMYHGSPILLSILGPLTVNSLVFVIADFSTAMLIRATGHNLQVAYTRSLKSLDLGLAPLAAFGWVIASHLSLYPAILIIPVILFLGYGPDSPPRKLFFQRNFPKIRDDIQPSQAAEPSYFLWRSVVIFFLWASLFACFVLFLCGIAVKNYGGLWEMIQRTYGFILTVEDLSPNVGVLWYFFAEVFDFFRNFFLMIFHVNILFMMLPLAIRLNHRPCFLAFVYIAISSILKSYPSVGDSALYLGLLSLFVNELADMQFSFFLFSGYVGVSLLSPVMHNLWIWRGTGNANFYFATAMAYACFQIVLVVESVDAILNHDRKIRKLSSLCGL…
AeCYP86A5	Arel.010068	ATGGAAACCCTACTCATAATATTCAGCCTCACAGCTGCCACGTCAGCGTATTTGCTCTGGTTCTTTACTCTAGCTAATAAGCTCACCGGGCCGAAGGTCTGGCCCATCGTCGGAAGCCTCCCAGTTCTGTTCATGAACCGGAGGCGCTTCCATGACTGGGTCGCTGGAAACCTCCGCGCAACGGGCGGCGCCGCCACCTACCAAACTACTACCATTGCCCTTCCTTATTTTGCCCGTAAACAAGGGTTTTATACTGTTACTTGTAACCCGAAAAATATTGAGCATATTCTTCGGACCCGGTTTGATAATTACCCGAAAGGGCCCACTTGGCAAACTGCATTCCATGACCTTTTAGGGCAAGGGATCTTTAACAGTGATGGTGACACTTGGCTGATTCAG…	METLLIIFSLTAATSAYLLWFFTLANKLTGPKVWPIVGSLPVLFMNRRRFHDWVAGNLRATGGAATYQTTTIALPYFARKQGFYTVTCNPKNIEHILRTRFDNYPKGPTWQTAFHDLLGQGIFNSDGDTWLIQRKTAALEFTTRTLRQAMARWVSRTIKTRLWKILHKACSENRPVDLQDLLLRLTFDNICGLTFGKDPETLSPDMPDNPFANAFDSATEATLQRLLYPGFLWRLKKIFGIGEELRLKKCLEIVENYMSDALTTRKENPSDDLLSRFMKKKDVNGNSFPNSVLKRIALNFVLAGRDTSSVAMSWFFWLVMNNPDIEGKIINEMCQILSETRGEDRQKWIEDPLVFDEADRLIYLKAALAETLRLYPSVPEDFKYVVSNDVLPDGTYVPS…
AeCYP71C3	Arel.003986	ATGAAACAAAAGAAGAAAGCTGTAACAAGTAAGAACCTTCCACCAAGTCCTCCAAAACTTCCCATTATAGGAAACTTACACCTACTAGGCAAGCTGCCTCACCAAGCCTTGTGGCAACTTGCGCAAAATACCGGTCCGGTCATGCTACTAAAGTTTGGTAGCAAATATACCCTGATAATATCCTCAGCTACCATGGCCAAAAAGATCTTGAAAACTCATGACCTTAATTTTTGTACCCGACCTAATTCGTCCGGGGCAAAAAGACTTACTTACAATTGCTTAGATGTAGCTTTTGCACCATATGGTGATCATTGGAGAGAGATGCGCAAACTCTTTGTTACTGAGCTATCGAGTTCCAAAAGAGCACCACAATTTCAAAAGTCAAGGGAGAAGGAGGTT…	MKQKKKAVTSKNLPPSPPKLPIIGNLHLLGKLPHQALWQLAQNTGPVMLLKFGSKYTLIISSATMAKKILKTHDLNFCTRPNSSGAKRLTYNCLDVAFAPYGDHWREMRKLFVTELSSSKRAPQFQKSREKEVNELINFLSSKSGSPVHLDEKFCCMMDEIVCVVAFGKSHRGEKFNGKELKEVIGDAMMILDSFSAGDFFPWIGWIIDLISGCGPNGERKRLEKCFKQLDGYFQMVLDEHLDKAKLKLGHDEQDVADSMIRRLSKGETIGNSCLTKNHIKAIFLNIFLGGVDTSSVTMAWAMSELIKNPRVMQKLQTEIRQLVPSKSKVQEADLPNLTYLKMVVKETLRLHAPVPFLIPHESICHSKESICHSKIGGFDIFPKTRVLVNVWGIGRDPN…
AeCYP71D24	Arel.032708	ATGGAGTTTCAGCCCCCTTTGGCTATCATCACTTCCTTCATCCTCCTCTTCCTCTTTCTAGTCAAGTTATTCAAAAGATCCAAACCCGAGAAACTGCCCCCCGGACCACCAAAACTACCTTTCATAGGAAATTTGCTTCAAGTGGCCCGTGCAAATCCGATACCACACCGTGGCCTCCTCGAGTTGGCCACAAAATATGGACCTTTAATGCATCTACAGCTCGGTAACATTCCAGCTATAGTGGTATCATCGCCACGAGTGGCGAAAGAGGTACTAAGAACACATGACCTTGCATGTGCAGATAGGCCAGATATGTTACTAGGCAGAATTATGTTAAAGAATAGTAGGGATATTGTTTTGGCCCCCTATGGTGATTACTGGAGGCAAATGCGCAAAATT…	MEFQPPLAIITSFILLFLFLVKLFKRSKPEKLPPGPPKLPFIGNLLQVARANPIPHRGLLELATKYGPLMHLQLGNIPAIVVSSPRVAKEVLRTHDLACADRPDMLLGRIMLKNSRDIVLAPYGDYWRQMRKISTTELLSANKVRSFCNIREEESWQLIESVRSSLGSPFNFSIKVTAMANSVICRATIGKKCKYQEELIELVEDIAYWGSGFFMADLFPSLKFLEYVNGMRPTLEKMRRKLDHIFSNIIDDHKEKLARRKEQNVSDVDAKDEDLVDVLLRINEGQQLEFPITSNDIQGTTLDMFTAGTDSTSATLQWIMSELMRNPRVMEKAQAEVRQAFKGKTIIHEADIEGLSYLKLVIKETLRLHAPVPLLVPRECRKKCEIDGYTIPVGTKVIV…
AeCYP88D1	Arel.005150	ATGATGGAGCTGATGGCGATTACGTGGGTGGTAGGTATACTGCCGCTAATGGGGTGGTGGTTGTGGTGGTGGAATGATATATGGTATGGCCTCAGACTTAAAGTTAAGGGTGGTTCCGCTAGCGGCATCAAACTACCTCCGGGCCATATGGGCGCTCCGTTCATCGGGGAGATGCTTAGATTTCTTTGCTATTTTAAGTTTTTTGGTCGCCCTGATGACTATATCAACTCTAAAAGACACAGGTACGGTGATGGCGTTGGGCTGTTCAAAACGCACCTGTTTGGATCACCCGCAGTGATAGCGTGGTCACCAATGGTGAACAGATTTATATTCCAAAACGAGTCAAAGTTCATACTTGAATGGCCAACTGTTGAAATTGTAGGGAGTAGCTCATTAGTT…	MMELMAITWVVGILPLMGWWLWWWNDIWYGLRLKVKGGSASGIKLPPGHMGAPFIGEMLRFLCYFKFFGRPDDYINSKRHRYGDGVGLFKTHLFGSPAVIAWSPMVNRFIFQNESKFILEWPTVEIVGSSSLVAVTFENIGKFFASFEPGSVLDTLDKLFEGIVSGVRAYPINFPGTAYHHAIQCRKKAIEIFRKELEKKRKNDLDGGGKDTNDLMDGLMQLKDDEGKQLSDIEVLDNIVSLVVAGYESTSLAIMWALYYLPKYPNVLQKLREENMSLTKNKNGELITSDDIAKLKYTNKVVEETIRTGNIAAIVFRTATEDVEYKGYTIPKGWKVMLWVRYLHTNPENFDDPMSFNPDRWNEPAKPGTYQVFGGGSRICAGNMLARLQLAIFLHHLSI…
AeCYP89A2	Arel.029480	ATGGAGACCTGGTTCATCATCATCCTCACGCTCTGCATCTCTGCCCTCCTCAAATCCTTCTTCTCTCTCCTCTTTCCCTCCTCCATTAACAGCAGTAAGAAGCTCCCGCCGGGACCAACTCAGATTCCGGTTATCGGTGGCTTTTTATGGCTCCGCAAGTCATTCTTAGAGATGGAATTTATCCTTAAGGACCTCAAGCTCAAGTACGGTCCAATCCTCACCATCAGAGTGGCCTCTCGCACCGCCATATTCGTCTTCAGCCACTCCATCGCCCACCGTGCGTTAGTTCAGAACGGCGCCGTTTTCTCAGACCGTCCCAAACCCCCTCCCACCAATCGGATCCTTTCCAGCAACCAACACAACATCAGCTTCGCCGGCTACGGCCCTACATGGCGACTT…	METWFIIILTLCISALLKSFFSLLFPSSINSSKKLPPGPTQIPVIGGFLWLRKSFLEMEFILKDLKLKYGPILTIRVASRTAIFVFSHSIAHRALVQNGAVFSDRPKPPPTNRILSSNQHNISFAGYGPTWRLLRRNLTSEILHPSRIKSYSHARNWVLGILIRRLITESGTGEPNAIKVVDHFQYAMFCLLVLMCFGDKLEENQIKQIEKVQRDLLLSLSRFNILNLWPKLGKIVFRQRWKEFFQVYQNRVDVLVPLIKGRVEKSNQQQEEQEEFVVAYADTLLNLQMPDEENRKLTYEEMVSLCGEFLNAGTDTTSTALEWIMANLVKYPEIQAKLYEEIVGVVGPRKQPSALSGGGPEKMVVVEEEDLQRMPYLKAVVLESLRRHPPAHFVLPHSV…
AeCYP79D1	Arel.018001	ATGATCACTTTGCTTTTCCCATTCCTTCTGAAATACCAAATTAGGCTGAAAAAGAAAATCTCAAATCCTCCAGGCCCAATAGCTTTACCCTATCTTGGATGCCTCCTTCAAATGCTCATGAACAAGCCTACTTTTCGATGGATACATCGGCTTATGGACGAATCGAACACTGAAATATTCTGCATTTGCCTCGGAAGAACCAATGTCTATGCTGTGACTAGTCCCGAAATCGCCTGCGAGTTCTTGAAGCAAAAAGACGCCGTTTTCGTTTCAAGGCCTAAATGCATGGCGGCTGACGTCACTACTGACGGTTACTTGACGACGGCTATGAATCCGTTCGGGGATCAATGGAAGAAGATGAGGAGAATCCTCTCTTCCGAGCTGCTTTCAACGTCAAGA…	MITLLFPFLLKYQIRLKKKISNPPGPIALPYLGCLLQMLMNKPTFRWIHRLMDESNTEIFCICLGRTNVYAVTSPEIACEFLKQKDAVFVSRPKCMAADVTTDGYLTTAMNPFGDQWKKMRRILSSELLSTSRHRWMHNKRVEEADHLIRYVYNQGGGIVNVRVAAQHYCGNVIRKMIFGTRFFGKGMEDGGPGGEEVEHVAALFTTHSYLYSFCVSDYFPFLRRFDLQGHEKIIKKAVNSVRKYQDPLIDQRVQLWENGSRKQEEDLLDVLICLKDENGNRVLSAQEIKAQIVDIMLATVDNPSNAVEWAIAEMINQPEILKRATTELDSIVGRDRLVQESDIPHLNYVKACAKECFRLHPVAAFNVPHMSIADCTVAGYFIPQGSHVLLSRLGLGRN…
AeCYP716A14	Arel.019989	ATGGCTTCCTCCTCGATTCTTTCCTTCTCCTCATCCTACATAAACCTGCATTTCCAATTGAATCAGCAAAAGGGTTTGGCCTCAACAGCAACAAGAACAAGAAAGAATTGTTGTAATTTGATTACGCACTCAAGTCTCACTAACAACAATGCTGACCTTCTCCAAGCAGCCAAGCACACTGTGGACGCATACATTAGAAGTGGCATGGTTATTGGCTTAGGGTCTGGCCACGCTTCTCGTTTGGCAATACAATATCTGGGACAGCAACTTCATGCTGGTAAAATAAAAGATATCGTTGGGATTCCCACATCCGTTGGCAGTGCAAGTGAAGCAGCAAGGGCAGGGATACTTTTGGATCAGTATGAAGATAGTTCTCAAATTGACTTTGCATTTAATGAT…	MASSSILSFSSSYINLHFQLNQQKGLASTATRTRKNCCNLITHSSLTNNNADLLQAAKHTVDAYIRSGMVIGLGSGHASRLAIQYLGQQLHAGKIKDIVGIPTSVGSASEAARAGILLDQYEDSSQIDFAFNDADIVEEKTLAAVIGRQSEESIIQEKTILKAAGELVFMIMGKQYRNNLDGSIPVLINPLNWFETAEEIEDLFLGDAEVWRRPSIGHADPLGGDFPLVTGEGHNVLDVIFTSPIVNLADVAESLDKIDGVVEHGVFAKTPCTVVIATEDGVRIVDNTVKSEPGGFLKAEVLVRRLGGMDRRNDPAAVEDSVGRERRSGGLSYPLSKTITLSFACRFIMGIDKPERIARLVNHFDNITLGRIRYICSIFGGGPRFCPGKKYAKLIILTF…
AeCYP82C5	Arel.008230	ATGGTAGCCTGGCAGGGCTGCTATATGATTGAAGTGCATGCTATATTATTCCTGTTCAATCACACACACACACACATAATGGATGCAGTACTCCTACTGCAAGCCGCTGGAAGTGTTGTAGCAGCATTAGTTTTATTCAACAAGTTGTGGAGATTTATAACCAACAGCCATGGTGATGTTAATGGGAGGAGGATACAAGCCCCTAAACCAAAGGGTGCCTGGCCAATTTTAGGCCACATCCCCCTTCTTGGGGGACAAAATCCTGTTTTCAGGACACTGGCTGCCGTGGCCGATAAAAACGGCCCCGTATTCAGAATTCAGCTTGGATTCCGCCAAGCATTGGTTGTGAGTAGCAAGGAAGCAGTACTGGAATGTTTCACTACTAATGACCATGTTTTT…	MVAWQGCYMIEVHAILFLFNHTHTHIMDAVLLLQAAGSVVAALVLFNKLWRFITNSHGDVNGRRIQAPKPKGAWPILGHIPLLGGQNPVFRTLAAVADKNGPVFRIQLGFRQALVVSSKEAVLECFTTNDHVFMTRPNSVALRYMGYNGAFFGLAPYGPFWREMRKISTFEVLSKRRLELLKDVRASEVTQCIKELYLLCCKNGTVGSAKFNMAQWLLQVTINIMIQMIARKRYCSVGDGGNDMESRRFEKAIKEFFYLLGAFELSNMIPFTEWMDLQGHLRSMKRIAKELDYFMSCWLDEHIQSRGEKGQPKEEPDFIDVMLSLFAESDGLIHGHKSSDVIKATVLNLILAGADTSSVTMTWAISLLLNHNKVLQKAQQELDIHVGKERLVEESDIKN…
AeCYP51G2	Arel.023042	ATGGAATCAGCTTCGTTGGTGGTGGATATCAACAGCAGCAGCAGCAAGTGGATGAATGTGGGGATCCTACTGGTGGCCACTCTGGTGGTGGCAAAACTCATGTCAGTGCTCCTCATGCCCCGATCAAGTAAACGTCTTCCTCCGGTGGTGAAAACGGCCTGGCCCTTGATCGGGGGACTGCTCCGCTTCCTGAAAGGCCCGGTTGTGATGCTGAGGGAAGAGTACCCAAAGCTTGGTAGTGTTTTTACCCTCAATTTGGTGAACAAGAACATCACTTTCTTGATCGGCCCCGAGGTTTCGGCCCATTTCTTCAAGGCCTCCGAGTCCGATCTCAGTCAGCAGGAGGTTTACCAGTTCAATGTCCCAACTTTCGGCCCTGGCGTGGTCTTCGATGTTGAT…	MESASLVVDINSSSSKWMNVGILLVATLVVAKLMSVLLMPRSSKRLPPVVKTAWPLIGGLLRFLKGPVVMLREEYPKLGSVFTLNLVNKNITFLIGPEVSAHFFKASESDLSQQEVYQFNVPTFGPGVVFDVDYSVRQEQFRFFTESLRVNKLRSYVDQMVMEAEDYFSKWGDSGVVDLKYELEHLIILTASRCLLGEEVRNKLFDDVSALFHDLDSGMLPISVIFPYLPIPAHRRRDQARKKLAEIFGRIIASRKQTGKSENDMLQCFMDSKYKDGRPTTESEVTGLLIAALFAGQHTSSITSTWTGAYLLRNKEYLSAVSDEQKNLMRKHGYKVHHDILSEMEVLHGCIKEALRLHPPLIMLLRSSHSDFSVKTKDGKEYDIPKGHIVATSPAFANR…
AeCYP72A33	Arel.015900	ATGGGAGTACTACTAGTAGCTTCAATAGTAATCTCAGTTGTTTTGGTTACAATTGTGAACTTGGCACACAAATTAGTGAATAGGCTATGGGTAAGGCCGAAAAAGATAGAGAAGTACCTGAGAGAGCTTGGGTTTACTGGCAATCCGTACAAGTTTTTGCACGGCGATATGAAAGAGTTCTCAAGGATATCACAAGCAGCAATGTCGAAACCCATCGACTTCTCCCATGATATTGGAGCGCGAGTACTACCATATCAACATCATTTAGTCAAGAAATATGGTAACAACTCATATATGTGGTTCGGAGCAAAACCAAGGTTAAATATCATGGACCCTATGCTAGTTAAGGAGATTTTATCTAAGCCTGATGAATTTCATAAAGTATACCCAGATCCGGTT…	MGVLLVASIVISVVLVTIVNLAHKLVNRLWVRPKKIEKYLRELGFTGNPYKFLHGDMKEFSRISQAAMSKPIDFSHDIGARVLPYQHHLVKKYGNNSYMWFGAKPRLNIMDPMLVKEILSKPDEFHKVYPDPVADLVVGGLSTAHGEKWSRHRKITNQAFNLEKLKGTLPEIYLSCKNMINNWKTLVPTKGSSEVDAWPYIEILARDMISRAAFGSNFEEGRRIFELHEKQTDLAFQSMGSSYIPWARPFQIKANREMKKLNGEMIEQLSGIIKKREKALKMGQEVNKDDLLSVLMEATRKETQEEGTGMTMEEVIDECKVFYSAGADSSARLLVWAMILLSKHTDWQARAREEVLQMTKR
AeCYP83B4	Arel.031015	ATGACTATATTTCTCCTTCTCCTCCTCCTTATACTTGTTCCTCTATGCCTACTACTTTTCCCACTAAAACCAAAAAAAATTGCCCGAAAACGCCGTCATCCACCAGGCCCTCAAGGGCTTCCCTTCTTAGGAAACTTGCACCAACTTGATAGCTCAACCCTTCATATCTATTTATGGAAACTTTCTCAAAGATATGGCTCCCTCATGTCCATGAAGCTTGGTTCTGTCCCAACTCTTGTAGTCTCTTCAGCAAGAATAGCAAAAGAAGTCTTTAAAACACATGATCTTGCATTTGCTAGTAGGCCATCTTTACATGGACAAAGGAAACTATCTTACAATGGATTAGATGTGTCCTTTTCTCCATATAGTGACTATTGGAGGGAGATGAGAAAAGTTTGT…	MTIFLLLLLLILVPLCLLLFPLKPKKIARKRRHPPGPQGLPFLGNLHQLDSSTLHIYLWKLSQRYGSLMSMKLGSVPTLVVSSARIAKEVFKTHDLAFASRPSLHGQRKLSYNGLDVSFSPYSDYWREMRKVCVLHLFSSKRSQSFRPIREDEVARLVKKICDLASSSKLVNLNEILMTLTTSIICRVAFGKRYDEEGSERSRFHDIFNETNAMLGSFFVSDYFPLMGWIDKLRGISGRLEKNFKDMDSFYQELIDEHLNSERTSSMKGDILDILLQLKRDKLFSLDLTFDHIKGVIMNIVIAGTDTSLAVVVWAMTRLMQNPTQMKQVQEEIRKTIGKKGHVDEDDLQKLVYLKAVVKETMRLFPPVPLLLPRETIDSCVIEGYEIQPKTLVYVNAWA…
AeCYP71AU2	Arel.006437	ATGTACATGCGCTTTGGCTTCGTTCCCAATATCATTGTCTCCTCCCCGCAAGCAGCCGAGCAGTTTCTCAAAAACAATGACGTTAATTTCGCAGGCAGGCCCCCTCTTGAGGCCGCCAAGTACATTTCCTATGAGCAGAGAAACTTGACATTTGCATCATACGGTCCTTATTGGCGCAACATGCGAAAACTGTGCACCACAGAGTTGCTAAGTAACCTTAAAATCAACTCATTTCAAGCCATGAGAAAACAAGAAGTTATGCAACTGGTAGATTTTGTCGAAAAGGCAGCTGAAAATGGCATTGCTGTGGATCTAACGGCTAAGGCCTCGTCCACGACAGCGGATATGAGTTGCAGGATGGTGTTTGGGAATAAGTACGAGGCCAAGGGGATGGACGAA…	MYMRFGFVPNIIVSSPQAAEQFLKNNDVNFAGRPPLEAAKYISYEQRNLTFASYGPYWRNMRKLCTTELLSNLKINSFQAMRKQEVMQLVDFVEKAAENGIAVDLTAKASSTTADMSCRMVFGNKYEAKGMDERGGLKEVMQQGIQIAAAFNLGDYFPYLGVLDLQGLTRKMKDIAKLWDDFFERIIDEHEGKSKEEREGEINKDFVDTMLEIMKSGGREFDFDRSHVKAVLLDLITAATDTTVTIIEWILSELLKHPQVMKKVQYELEQVVGLDRVVEESDLASLEYLDMVIKESFRLHPVVPLLLHESIEDCTVDGFFIPKKSRIVVNLWAIGRDPKVWTDAEKFFPERFVGSTIDLHGRDFELIPFGAGRRGCPGIQLGVTLVRLMVAQLVHCFDW…
AeCYP89A3	Arel.003341	ATGGAAACCTGGTTTGTAATCATCCTCACGCTCTGCATATCCGCCATACTCAAATCCTTCCTATTTTCATCCTCCAAAAAACTCCCGCCAGGACCCCTTACAGTTCCTATAATAGGTAACTTAATATGGCTCCGAAAATCATTTTTCGAGCTCGAACCCATCTTACATGACTTCAAGCTCAAGTATGGACCCATTATCACCCTCAAAATAGGCTCCCGCCCGGCCATATTCATCAGTAGCCAATCAATAGCTCACCGGGCACTCGTCCAAAACGGCGCCATATTTTCCGACCGTCCCAAAGAACTGCCCACCAGTCGGATCATTACCAGCAACCAGCACAACATCAGCTCCGCCGCATACGGCCCCAATTGGCGGCTCTTCCGCCGGAATCTCACCTCC…	METWFVIILTLCISAILKSFLFSSSKKLPPGPLTVPIIGNLIWLRKSFFELEPILHDFKLKYGPIITLKIGSRPAIFISSQSIAHRALVQNGAIFSDRPKELPTSRIITSNQHNISSAAYGPNWRLFRRNLTSEILHPSRVKSYSSARNWVVGILIRRLFSESESQEFSGIKVMDHFQYAMFCLLVFMCIGDKLEDEKIKQIEKVQRNVLLGSLRYNILDFWPKLGKIVFRKKWKELIQVREDQDNVLIPLIKARLDKIKQQKEQEDDEYLVAYVDTLTNLQLPEENNRNLSDEEMVSLCGEFLNGGTDTTSTALQWIMANLVKYPKIQAKLYEEIIGVMGPKRPSLLAFPGEGNEEKMVVVVEEDLRRMPYLKAIVLESLRRHPPGHFVLPHSVTEEM…
AeCYP704C3	Arel.000755	ATGATGGGTACTCTTGTCTTAGTTTTGATGATCATTTTCTTACTTTTGATAGGGTTTTACGCCGCACCATCTTTCACTTTCATTTCAGCGTTAGTTGGAGCTGTAATTCTGTTCGTGGTAGGATTAGTAGCTGTATTTGTAGTTAGTTATATCAAAGAATTGATCACCAAGGATGATCGCCCACCGGTGGCAGGCCCAATTTTCAACCAACTAATACACTTCGACAGGCTTTTTGATTATCAGACATCCCTTGCTCGAAAATACCCTACTTACCGGCTGATCACGCCTTCTCATAGTGAAGTCTATACTGCAGATCCTGTTAACGTTGAATACATTCTTAAAACCAATTTTTCCAACTATGGAAAAGGGATGTATAATATTGGGATCATGAGTGATCTT…	MMGTLVLVLMIIFLLLIGFYAAPSFTFISALVGAVILFVVGLVAVFVVSYIKELITKDDRPPVAGPIFNQLIHFDRLFDYQTSLARKYPTYRLITPSHSEVYTADPVNVEYILKTNFSNYGKGMYNIGIMSDLFGDGIFAVDGDKWRHQRKLASHEFSTKVLRDFSTAVFRTHAAKLASKISEASMATEMMDLQDLLLKSTLDSIFKVGFGVDLNTLSGSDDFSNRFMKAFDDSNAIVYWRYVDLLWRIKRYLNIGYEATLKQNIRLIDNFVYALIRQKREQMKNGKLDGEGGKEDILSRFLIESETNPETMSDKYLRDITLSFIIAGKDTIANTLTWFFYMLCKNPLVQEKVAQEVREATEVENSSISTDKFADKLSEAALDKMQYLHAAITETLRLY…
AeCYP71D25	Arel.026734	TCATTTGTCTCAAAAAGATTGCCCCCAGGGCCATGGAAGTTACCCCTAATTGGAAACCTGCACCAAATGATGGGCTTAGGCTCCGTCCCACATCGCATTCTTACAAATCTCTCCAAGAAACATGGACCCATTATGCATCTCCAGGTAGGTGAAATGTCCATGGTAGTCATCCCTTCCCCAGAAGTAGCTCAGCAGGCCTTAACCACCCATGATCTTGCCTTTGCACAAAGGCCACAAAATGTTTTCCCCGAAAACTTAACCTATAATAACTCTGGAGACGTGATGATGATGATATTAATGTTGTCAACCTTAGTAGCAAGATATTGGAGTTTTGGTGAAAAGATTAGCAATAATGATCGAGATGAGTTCATACCACTGCTCAACCGGCTAATGGAGCTT…	SFVSKRLPPGPWKLPLIGNLHQMMGLGSVPHRILTNLSKKHGPIMHLQVGEMSMVVIPSPEVAQQALTTHDLAFAQRPQNVFPENLTYNNSGDVMMMILMLSTLVARYWSFGEKISNNDRDEFIPLLNRLMELGGAFMIYQIFPSLKFVHHLSGLKAVSEYIFGRMDKILQHIVDGHKATSRDPDDAEGGEDNLVHMLLKHQARVDLWFSITTNTVKAVILDMITAGIENPATAIEWAMAELLRNPRVMHKAQTEVRQLLNKKNKHKNQETDIQELTYLQSVIKETLRLHPPIPAIPRECRESCEINGYTIPAKTKVIINTWAIGRDPKHWIDADCFYPERFLDSTIRSFEYIPFGGGRRMCPGMLFGMACVELPLACLLYHFDWKLQDGIKPEQVDMS…
AeCYP75B2	Arel.026623	ATGCCTTCCTGCACAATGTATCTCACAGCAGCCCTTGTCATCCTTGCCATATTACTCTTCACTTTAATGTCTACCAAAAGATTTAAAAACAGCAAGCCAACATTGCCACCCGGTCCTCGAGGCTTGCCTCTAGTTGGAAACCTCCTCTCTCTGGAACTGGATCTCCACACACAGTTCACGAGCCTAGCTAGGACCTATGGTCCTATCCTAACCCTTTGGCTCGGAAAAAAGGTCAACGATGCCAATGACCAAATTGCTCGAATACTCCTCAGTCTCGCCCTTGTCCTTTTCACAATTTCATGGTTCTCATGGATTTTCATTGAAAATTCGAAACCAAAACAATTACCATTGCCACCGGGCCCGAGAGGCCTACCGGTGGTAGGAAGCCTCCCCTTTTTG…	MPSCTMYLTAALVILAILLFTLMSTKRFKNSKPTLPPGPRGLPLVGNLLSLELDLHTQFTSLARTYGPILTLWLGKKVNDANDQIARILLSLALVLFTISWFSWIFIENSKPKQLPLPPGPRGLPVVGSLPFLEPELHSYLAGLARTYGSILTLRLGRKVNIVVTSPALAREVLKDYDVTFANRDVPAVTKAMDYGGCDIVWTPYGPEWRMLRKVCVREMLGNAPLDSVYSQRRNEIQNTIKHLHGQVGFPVNLGEQMFLTVLNVITNMLWGGTVQGKERDTIGAEFRQVVGEVSAQLGKPNISDFFPGLARFDLQGIKKKMTSVTMKLDRIFDSMIEHRLKMDGDGGKESKDFLQVLLKLKDEEDAKTPLTMNHLKALLLDMVVGGTDTSSNTIEFAM…
AeCYP736A42	Arel.031152	GGATTGACTCGACGTTTCAAGGCACTGCACAAAGATCTTGACAAAACCTTGGAGAAGATTGTTAATGAGCATGAAGAAGCTGCTACTAGTGGAAGTAAAAAGCTTGACCCGGATTTCGTCGATGTACTACTATCATTATTGGATAAATCTTCAGAAAAAACTTATGCTGAGCTATCACACATGCTAGATAGAAGAACCCTAAAAGGAATTATAGTAGATATGATAGCAGCCGGTATTGATACTTCACACACTGCAATTGAATGGATCATGACTGAACTCATAAGACATCCGAGGATCATGAAACAACTTCAAGAAGAAATTAAGAGTGTTGTTGGAGTTAATGAGATTATAGAGGAGACTGATTTGACTAAGTTTACGTACCTAGACATGGTGATTAAA…	GLTRRFKALHKDLDKTLEKIVNEHEEAATSGSKKLDPDFVDVLLSLLDKSSEKTYAELSHMLDRRTLKGIIVDMIAAGIDTSHTAIEWIMTELIRHPRIMKQLQEEIKSVVGVNEIIEETDLTKFTYLDMVIKETFRLHPVVPLLVPRESMEDIVIDEYYIPKKSRVLINSWTLGRDPDLWSENVEEFIPERFIAGVDFFGHDYKFLPFGSGRRICPGMHLGLINVRQIVAQLVHCFDWELPNGMSLGDLNMDEKFGLTLPRAQHLLAMPVRRL
AeCYP71D26	Arel.032880	ATGCTCGGAGCAATGGAGGTCCATTATTCCCTATTTTCTGTGATATTTTCCCTCATTCTCCTCACCTTTTTCCTGTTTAAGTTAGCCAAGGAACTAAAAACATCTAAAACACAAAAACTCCCACCCGGGCCATGGAAGCTACCTGTCATTGGAAATATGCTCCATTTGGCAGGTACACTACAAACTCATGGTCTCCGGGACTTGGCCTTGAAACATGGACCTCTCATGCATCTACAACTTGGTGAGATTTCAGCGGTTGTCGTATCATCTGCCCAAGTAGCGAAAGAGGTATTGAGAACTCACGATATTGCCTTTGCAGACAGGCCAAAGCTTATTGCCTCCGAGATTCTCTTGCGCAATGGTAAAGACTTGGTTTTTGCTCTCTACGGTGATTATTGG…	MLGAMEVHYSLFSVIFSLILLTFFLFKLAKELKTSKTQKLPPGPWKLPVIGNMLHLAGTLQTHGLRDLALKHGPLMHLQLGEISAVVVSSAQVAKEVLRTHDIAFADRPKLIASEILLRNGKDLVFALYGDYWRQMRKICTAELLHANKVSFFRSIREEEAWRLIESIQSSLESPVNLSKRFSALTNAVTCRATIGKRSQYQDELIQLIEDTASLAGGFDISDLFPSVKLLHVLSGMKPKLQTIRKKLDKIFDNILLEHKENRNSTYKGYGVIEEDFVDVLLSVQERGGFEFPITTDDIYGLILNMLIGGTDTTATALEWTMSELIRNPHVLEKAQAEVRQTLKGKTTIHENDIQGLSYLKLVIKETLRLHPPLALLLPRKSRDERQINGYLIPIDTKL…
AeCYP82A2	Arel.002362	ATGGAGTTCCTTGTCCCATCCCCAATATCCACAAGTGCCACTATCTTTTCCTTTATACTATTCTTTTTCTCTATTCTCTTCTTAACCCAAAAAATTTCAAACAGACAAAAAGAAGAAAGAAAAACAGCCCCAGAAGTCGCCGGAGCATGGCCCATAATCGGCCACCTCCATCTTCTCGGCGGCCAACAGCCGCTGCACATAAAATTGGGATCTTGGGCTGACAAGTACGGTCCAATCTTCTCGATCAAGCTCGGCGTATACCGATCTCTGGTAGTTAGTGACTCAAAGTTGGCTAAAGAATGTTTTACTACAAACGACAAAATCTTTGCTACTCGCTCAAAATCATTAGCAGTGGAGCTCATGGGCTATAATTATGCTATGTTTGCTCTTGGGCCTTAT…	MEFLVPSPISTSATIFSFILFFFSILFLTQKISNRQKEERKTAPEVAGAWPIIGHLHLLGGQQPLHIKLGSWADKYGPIFSIKLGVYRSLVVSDSKLAKECFTTNDKIFATRSKSLAVELMGYNYAMFALGPYGRYWRQVRKMVMLEFLSHRRIETMAHIQVSEIKSSIKTIYDNCHKENGLDNVKVEMKEYFEHLILNTTVRMLVGKSYLPEEEEGVRFQKALKKLLDLLGTFMVSDAIPYLRWLDLGGYQKIMRKTSKEMDDILEVWLKEHRERRDLGLVKGEQHDFMDAMLAHVDGAADDDFPGFDADTINKAVCLTLLSGATETVTVSLTWALSLLLTHPNAMKKFQDELDIHVGKNRQVEESDLAHLAYLQAVIKETLRLYPAAPVGVPHEAME…
AeCYP736A43	Arel.031596	ATGCCCATTCAATCATCCTCTCCTACTAGTACGCTGCCGAATCCACAACCACATGTCTCCCCTAACCCTCCTCGTGTCACCACTGATCCTACGTCTACACAACCTCAGCCTTTACCCCGCACTCACCCTATGGGATTGACTCGACGTTTCAAGAATTGTAGCGAGGCTATTGACAAAGTCTTGGAGATTATTATCAATGAGCATGAAAATGATGCTACTAATAAGCATAAAAGTCTTGATAGGGATTTTGTGGATGTGATTCTATCTTTGAAAAACAAGTTTACAAGTACCCATAGCCAGTTATCCTCCATAATCGATAGAACAGATATGAAAGCAATCATACTAGATATGATCATCGGAGCAGTTGATACCTTGCATACTTCAATTGAATGGATCATG…	MPIQSSSPTSTLPNPQPHVSPNPPRVTTDPTSTQPQPLPRTHPMGLTRRFKNCSEAIDKVLEIIINEHENDATNKHKSLDRDFVDVILSLKNKFTSTHSQLSSIIDRTDMKAIILDMIIGAVDTLHTSIEWIMSELIRHPTVMKRLHEELNTVMGDDEMVEESHLSKLEYLDKIIKESIRLHPVTPFLLPRESMEDIVIDGYYIPKKSHIIVNNWTLGRDPNVWSENVEEFLPERFIARNINLRGGDFQLIPFGSGRRGCPGVHLALINIKLVVAQMVYCFDWELPFGKSVTELEMDEKFGLTLPRANHLLAIPILRLGRKIPS
AeCYP72A34	Arel.012509	ATGTTGGTTACTGTAAGGAGAGGCGCAGATAGAGCAGATATTTACAGCATGGCTTTCTCTTTAACTGCCCAATGGCTAGCTGTTTCAAGTGATAAGGGAACTGTCCATGTCTTTGGTCTAAAGTTTGATTCAGGGTCTTTGGGAATCGAAAGATCAAGTAGTGGAAAATCAAATATGTCGACTACATCTGCTGTTTCGCATCTTTCATTTTTTAAAGGAAAGAACTCATTTTTATGGCTTGGACCAAAACCAATGGTCCATATTATGGATCCTGATCATATCAAAGAGGTCTTGACCAAGTTTTATCAGTTTCAAAAGCCCAGGGATAATCCTTTAACAAAATTGCTTGCAACTGGAGTAGTAGATGCTGAGGGTGACAGATGGGCCAAACACAGGAAA…	MLVTVRRGADRADIYSMAFSLTAQWLAVSSDKGTVHVFGLKFDSGSLGIERSSSGKSNMSTTSAVSHLSFFKGKNSFLWLGPKPMVHIMDPDHIKEVLTKFYQFQKPRDNPLTKLLATGVVDAEGDRWAKHRKLINPAFHLEKLKNMLSAIYLSSSEIMTKWEKMVSTKGQFELDVWPYLETLTSDAISRTAFSSSYEEGRKIFQLQKEQAELVIQASQAIYLPGMRFLPTKRNKRMKEIAKEVKLALKSIINKRLKAMEAGECSHDDLLGILLESSSKEIKQHGNTNFGLTVDEVIEECKLFFFAGQETTSSLLVWTMILLSQHQDWQKRAKEEVLHVFGNNKPDFDGLNHLKVVNMILLEVLRLYPPVVSLDRTIYEEIKLGKISLPVGVLVQLPLI…
AeCYP71D27	Arel.032704	ATGGAGTTCCAATCCCCCATTTTTATTATCTCCTCTCTCATCTTCCTTTTCTTCTTTCTGTTGTTATTAAAGGAATCCAAAAGATCCAAAACCGGTAACAGAAGTACAAAACTGCCACCAGGGCCATGGAAGCTACCTCTCATAGGAAATTTGCTCCAAGCGGCTGGCACTGTCCCGCATCGCGTTCTCCGAGAGTTGTCAAACAAACATGGACCCCTCATGCATCTTCAACTCGGCGAAATCTCTGCCATCGTCATATCATCACCTAGAGTTGCCAAAGAAGTGCTAAAAACGCACGATATTGCCTTTGCAGACAGGCCATCAGTTTTACTAGGCCAAGTTATTTTGGCCAACTGTAGAGACGTTGTGTTGGCTACTTATGGTGATTATTGGAGACAA…	MEFQSPIFIISSLIFLFFFLLLLKESKRSKTGNRSTKLPPGPWKLPLIGNLLQAAGTVPHRVLRELSNKHGPLMHLQLGEISAIVISSPRVAKEVLKTHDIAFADRPSVLLGQVILANCRDVVLATYGDYWRQMRKVCTLELLSANKVRSFRSIREEESFNLVESIRSSLGSPVNISEKVSELANGITCRATIGKRCKYQDELIKVVEDIAYLGSGFFMADLFPSLKFLPVLSGMKPRLQKVRRKLDRIFDNIMQEHREKLASIKKGTVLDAEEEDLLDVLLRINDSNSLEFPISSNDMQGIILDMFTAGTDTSSAILEWAMSELIKHPSAMEKAQDEVRQALKGKESIYEADIQGLKYLKFVIKETLRLHAPVPLLLPRECRKECEIDGYTIPLKTKV…
AeCYP96A7	Arel.029981	ATGGCTATTTTCAGTATTGGAATTCTCCTTCTCCCTATCTGCTTAATCTTTCTCTACAGTTGGATTCACCGGAGTCGTAAAAGCTCGTTGTTAACTGACTGGCCGGCCGTCCATATGACACCGGGACTCCTTCGGAATGCTCATCGTATACACGAATTCACCACCGATCTTCTAAAAGAAAGCCATGGAACATTTGAGCTCAAAGGTCCTTTGTTAGCAAACTTGGACTTGTTTATCACTGCAGATCCGGCCAATGTCCACTACATCTTGAGCAAGAACTTTTCAAATTACCCGAAAGGCCCCGAATTCAGAAAGATTTTTGATATTCTTGGCGACGGGATTTTTAATGCTGATTTTGGATTATGGGAGCTGCACAGAAGAACCACTATGTCACTCTTC…	MAIFSIGILLLPICLIFLYSWIHRSRKSSLLTDWPAVHMTPGLLRNAHRIHEFTTDLLKESHGTFELKGPLLANLDLFITADPANVHYILSKNFSNYPKGPEFRKIFDILGDGIFNADFGLWELHRRTTMSLFNHAKFLNMLQKNIRNKVEKGLIPVLDFVSRKGIVVDLQEIFQRLTFDGVCSMVLDHDPCSLSIDLPYIPCEKAFTIAEEALLYRHIVPESVWKLQSWIGIGKEKSLSKAWDAFDQFIYRCLTTKHDSNVSELEASESTAAEEELSLLTAYSKAYKEKTGNPKKFLRDTLLNLMIAGRDTTATALTWFFWLLSKNPLVEMKIQEEIKAMLNLKEGENWRFFSIEELRNMVYLHGALCEALRLFPPVALEHKAPVEPDVLPSGHPVDK…
AeCYP71D27	Arel.030190	ATGCTAATCAAGTTTCGAAATAAATCCAAAGCTTCAAATTTACCTCCGGGGCCATGGAAGCTACCTATCATAGGCAGCATTCACCATCTTTCTGGCTCTTTACCCCACCATGCCTTAAGAGAGCTGGCCAAGAAGCATGGGCCTATAATGCACCTCAAACTCGGAGAAGTTTCTACAATAGTAGTTTCTTCACCGGAAATTGCAAAAGATGTGATGAAAACGCATGATATCAACTTCGCTTCAAGGCCTCTAATTCTTGCAACAAAGATTATATCTTATGATTCTACAAGCATTGTTTTCGCTCCATATGGTGACTATTGGAGACAACTGCGAAAAATTTGCACACTCGAGCTTTTAAGCACGAAACGCGTTCAGTCCTTTAGATCTATACGAGAAGAA…	MLIKFRNKSKASNLPPGPWKLPIIGSIHHLSGSLPHHALRELAKKHGPIMHLKLGEVSTIVVSSPEIAKDVMKTHDINFASRPLILATKIISYDSTSIVFAPYGDYWRQLRKICTLELLSTKRVQSFRSIREEEVANLITLIAANAGSPINLTEKIYSAAYSTTSRAAFGKETKDQKRFILIVKELTKAAAGFNLADLYPSIKLFEWISGMRPKLERLQQETDRIVGNIINEHKEGKAKKNCEGEDLVDVLLKFQDGSDEFQLTTDNIKAVLLVSIFICFFKVYSAGSDTSATVVNWAMSEMLKNPSIMKMAQDEVRQVFNSKGNVDEADIHKLQYLKLVIKETLRLHPSAPLLIPRECRQSCEIHGYQIPVKTKVIVNAWAIGRDPKHWTDAECFNPE…
